# Supplementary material for: Development and usability testing of HEARTPA♀N: protocol for a mixed methods strategy to develop an integrated smartphone and web-based intervention for women with cardiac pain
Source: PubMed Central journal article supplement — BMJ Open. 2020 Mar 9;10(3):e033092. doi: 10.1136/bmjopen-2019-033092 (PMC7064127; doi:10.1136/bmjopen-2019-033092), 2020-03-09
Supplement: bmjopen-2019-033092.draft_revisions.pdf [file bmjopen-2019-033092.draft_revisions.pdf]

# BMJ Open

BMJ Open is committed to open peer review. As part of this commitment we make the peer review history of every article we publish publicly available.

When an article is published we post the peer reviewers' comments and the authors' responses online. We also post the versions of the paper that were used during peer review. These are the versions that the peer review comments apply to.

The versions of the paper that follow are the versions that were submitted during the peer review process. They are not the versions of record or the final published versions. They should not be cited or distributed as the published version of this manuscript.

BMJ Open is an open access journal and the full, final, typeset and author-corrected version of record of the manuscript is available on our site with no access controls, subscription charges or pay-per-view fees (<http://bmjopen.bmj.com>).

If you have any questions on BMJ Open's open peer review process please email [info.bmjopen@bmj.com](mailto:info.bmjopen@bmj.com)

# BMJ Open

## Development and Usability Testing of HEARTPAON: Protocol for An Integrated Smartphone and Web-Based Intervention for Women with Cardiac Pain

|                               |                                                                                                                                                                                                                                                                                                                                                                                                                                                                                                                                                                                                                                                                                                                                                                                                                                                                                                                                                                                                                                                                                                                                                                                                                                                                                                                                                                                                                                                                                                                                                                                                                                                                                                                                                                                                                                          |
|-------------------------------|------------------------------------------------------------------------------------------------------------------------------------------------------------------------------------------------------------------------------------------------------------------------------------------------------------------------------------------------------------------------------------------------------------------------------------------------------------------------------------------------------------------------------------------------------------------------------------------------------------------------------------------------------------------------------------------------------------------------------------------------------------------------------------------------------------------------------------------------------------------------------------------------------------------------------------------------------------------------------------------------------------------------------------------------------------------------------------------------------------------------------------------------------------------------------------------------------------------------------------------------------------------------------------------------------------------------------------------------------------------------------------------------------------------------------------------------------------------------------------------------------------------------------------------------------------------------------------------------------------------------------------------------------------------------------------------------------------------------------------------------------------------------------------------------------------------------------------------|
| Journal:                      | <i>BMJ Open</i>                                                                                                                                                                                                                                                                                                                                                                                                                                                                                                                                                                                                                                                                                                                                                                                                                                                                                                                                                                                                                                                                                                                                                                                                                                                                                                                                                                                                                                                                                                                                                                                                                                                                                                                                                                                                                          |
| Manuscript ID                 | bmjopen-2019-033092                                                                                                                                                                                                                                                                                                                                                                                                                                                                                                                                                                                                                                                                                                                                                                                                                                                                                                                                                                                                                                                                                                                                                                                                                                                                                                                                                                                                                                                                                                                                                                                                                                                                                                                                                                                                                      |
| Article Type:                 | Protocol                                                                                                                                                                                                                                                                                                                                                                                                                                                                                                                                                                                                                                                                                                                                                                                                                                                                                                                                                                                                                                                                                                                                                                                                                                                                                                                                                                                                                                                                                                                                                                                                                                                                                                                                                                                                                                 |
| Date Submitted by the Author: | 19-Jul-2019                                                                                                                                                                                                                                                                                                                                                                                                                                                                                                                                                                                                                                                                                                                                                                                                                                                                                                                                                                                                                                                                                                                                                                                                                                                                                                                                                                                                                                                                                                                                                                                                                                                                                                                                                                                                                              |
| Complete List of Authors:     | <p>Parry, Monica; University of Toronto Lawrence S Bloomberg Faculty of Nursing,<br/> Dhukai, Abida; University of Toronto Lawrence S Bloomberg Faculty of Nursing<br/> Clarke, Hance; University Health Network, Pain Research Unit; University of Toronto<br/> Bjørnnes, Ann Kristin; Oslo Metropolitan University, Department of Nursing and Health Promotion<br/> Cafazzo, Joseph A.; University Health Network; University of Toronto<br/> Cooper, Lynn; Patient Advisor<br/> Harvey, Paula; Women's College Hospital; University of Toronto<br/> Katz, Joel; York University,<br/> Laloo, Chitra; The Peter Gilgan Centre for Research and Learning<br/> Leegaard, Marit; Oslo Metropolitan University<br/> Légaré, France; Université Laval, Médecine familiale<br/> Lovas, Mike; University Health Network<br/> McFetridge-Durdle, Judith; Florida State University, College of Nursing<br/> McGillion, Michael; McMaster University, Faculty of Health Sciences<br/> Norris, Colleen; University of Alberta, Faculty of Nursing<br/> Parente, Laura; University Health Network<br/> Patterson, Rose; Anishnawbe Health<br/> Pilote, Louise; McGill University, Medicine<br/> Pink, Leah; Sinai Health System<br/> Price, Jennifer; Women's College Hospital<br/> Stinson, Jennifer; The Peter Gilgan Centre for Research and Learning; University of Toronto, Lawrence S Bloomberg Faculty of Nursing<br/> Uddin, Akib; University Health Network<br/> Victor, J. Charles; University of Toronto<br/> Watt-Watson, Judy; University of Toronto, Lawrence S Bloomberg Faculty of Nursing<br/> Auld, Carol; Patient Advisor<br/> Faubert, Christine; Patient Advisor<br/> Park, Deborah; Patient Advisor<br/> Park, Marianne; Patient Advisor<br/> Rickard, Beatrice; Patient Advisor<br/> DeBonis, Vincenza; Patient Advisor</p> |
| Keywords:                     | Coronary heart disease < CARDIOLOGY, Coronary intervention < CARDIOLOGY, PAIN MANAGEMENT, Women, Self-Management, Patient                                                                                                                                                                                                                                                                                                                                                                                                                                                                                                                                                                                                                                                                                                                                                                                                                                                                                                                                                                                                                                                                                                                                                                                                                                                                                                                                                                                                                                                                                                                                                                                                                                                                                                                |

1  
2  
3  
4  
5  
6  
7  
8  
9  
10  
11  
12  
13  
14  
15  
16  
17  
18  
19  
20  
21  
22  
23  
24  
25  
26  
27  
28  
29  
30  
31  
32  
33  
34  
35  
36  
37  
38  
39  
40  
41  
42  
43  
44  
45  
46  
47  
48  
49  
50  
51  
52  
53  
54  
55  
56  
57  
58  
59  
60

|  |                   |
|--|-------------------|
|  | Reported Outcomes |
|  |                   |

SCHOLARONE™  
Manuscripts

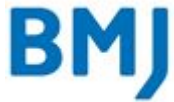

I, the Submitting Author has the right to grant and does grant on behalf of all authors of the Work (as defined in the below author licence), an exclusive licence and/or a non-exclusive licence for contributions from authors who are: i) UK Crown employees; ii) where BMJ has agreed a CC-BY licence shall apply, and/or iii) in accordance with the terms applicable for US Federal Government officers or employees acting as part of their official duties; on a worldwide, perpetual, irrevocable, royalty-free basis to BMJ Publishing Group Ltd ("BMJ") its licensees and where the relevant Journal is co-owned by BMJ to the co-owners of the Journal, to publish the Work in this journal and any other BMJ products and to exploit all rights, as set out in our [licence](#).

The Submitting Author accepts and understands that any supply made under these terms is made by BMJ to the Submitting Author unless you are acting as an employee on behalf of your employer or a postgraduate student of an affiliated institution which is paying any applicable article publishing charge ("APC") for Open Access articles. Where the Submitting Author wishes to make the Work available on an Open Access basis (and intends to pay the relevant APC), the terms of reuse of such Open Access shall be governed by a Creative Commons licence – details of these licences and which [Creative Commons](#) licence will apply to this Work are set out in our licence referred to above.

Other than as permitted in any relevant BMJ Author's Self Archiving Policies, I confirm this Work has not been accepted for publication elsewhere, is not being considered for publication elsewhere and does not duplicate material already published. I confirm all authors consent to publication of this Work and authorise the granting of this licence.

**Title:** Development and Usability Testing of HEARTPA♀N: Protocol for An Integrated Smartphone and Web-Based Intervention for Women with Cardiac Pain

**Authors and Affiliations:** Monica Parry,<sup>1</sup> Abida Dhukai,<sup>1</sup> Hance Clarke,<sup>1,2</sup> Ann Kristin Bjoernnes,<sup>3</sup> Joseph Cafazzo,<sup>1,2</sup> Lynn Cooper,<sup>4</sup> Paula Harvey,<sup>1,5</sup> Joel Katz,<sup>6</sup> Chitra Lalloo,<sup>7</sup> Marit Leegaard,<sup>3</sup> France Légaré,<sup>8</sup> Mike Lovas,<sup>2</sup> Judith McFetridge-Durdle,<sup>9</sup> Michael H. McGillion,<sup>10</sup> Colleen Norris,<sup>11</sup> Laura Parente,<sup>2</sup> Rose Patterson,<sup>12</sup> Louise Pilote,<sup>13</sup> Leah Pink,<sup>14</sup> Jennifer Price,<sup>5</sup> Jennifer Stinson,<sup>7</sup> Akib Uddin,<sup>2</sup> Charles Victor,<sup>1</sup> Judy Watt-Watson,<sup>1</sup> Carol Auld,<sup>4</sup> Christine Faubert,<sup>4</sup> Deborah Park,<sup>4</sup> Marianne Park,<sup>4</sup> Beatrice Rickard,<sup>4</sup> Vincenza Spiteri DeBonis<sup>4</sup>

<sup>1</sup>University of Toronto, Toronto, Ontario, Canada

<sup>2</sup>University Health Network, Toronto, Ontario, Canada

<sup>3</sup>Oslo Metropolitan University, Oslo, Norway

<sup>4</sup>Patient Advisor, Ontario, Canada

<sup>5</sup>Women's College Hospital, Toronto, Ontario, Canada

<sup>6</sup>York University, Toronto, Ontario, Canada

<sup>7</sup>The Peter Gilgan Centre for Research and Learning, Toronto, Ontario, Canada

<sup>8</sup>Université Laval, Laval, Quebec, Canada

<sup>9</sup>Florida State University, Tallahassee, Florida, USA

<sup>10</sup>McMaster University, Hamilton, Ontario, Canada

<sup>11</sup>University of Alberta, Edmonton, Alberta, Canada

<sup>12</sup>Anishnawbe Health, Toronto, Ontario, Canada

<sup>13</sup>Research Institute of the McGill University Health Centre/Institut de recherche du Centre universitaire de santé McGill, Montreal, Quebec, Canada

<sup>14</sup>Sinai Health System, Toronto, Ontario, Canada

1  
2 **Corresponding Author:** Dr. Monica Parry, Lawrence S. Bloomberg Faculty of Nursing

3  
4 155 College Street, Suite 130, Toronto, ON, Canada, M5T 1P8

5  
6 Phone: 416-946-3561, Fax: 416-978-8222, Email: [monica.parry@utoronto.ca](mailto:monica.parry@utoronto.ca)

7  
8  
9 **Word count:** 3,675 (excluding abstract and references)

10  
11 **Protocol version:** 1.0

12  
13 **Keywords:** women, self-management, cardiovascular diseases, pain, smartphone

14  
15  
16  
17  
18  
19  
20  
21  
22  
23  
24  
25  
26  
27  
28  
29  
30  
31  
32  
33  
34  
35  
36  
37  
38  
39  
40  
41  
42  
43  
44  
45  
46  
47  
48  
49  
50  
51  
52  
53  
54  
55  
56  
57  
58  
59  
60

For peer review only

## ABSTRACT

**Introduction** More women experience cardiac pain related to coronary artery disease (CAD) and cardiac procedures compared to men. The overall goal of this program of research is to develop and evaluate an integrated smartphone and web-based intervention (HEARTPA♀N) to help women self-manage cardiac pain.

**Methods and analysis** This protocol outlines the mixed methods strategy used for the development of the HEARTPA♀N architecture (Phase 2A), usability testing (Phase 2B) and evaluation of the pilot randomized controlled trial (RCT) (Phase 3). We are using the individual and family self-management theory, mobile device functionality and pervasive information architecture of mHealth interventions, and following a similar sequential phased approach recommended by the Medical Research Council (MRC) to develop HEARTPA♀N. The Phase 3 pilot RCT will enable us to refine the prototype, inform the methodology, and calculate the sample size for a larger multi-site RCT (Phase 4, future work). Patient partners have been actively involved in setting the HEARTPA♀N research agenda, including defining patient-oriented outcome measures (PROMs) for the pilot RCT: pain and health-related quality of life (HRQoL). As such, the guidelines for Inclusion of Patient-Reported Outcomes in Clinical Trial Protocols (SPIRIT-PRO) are used to report the protocol for the pilot RCT (Phase 3). Quantitative data will be summarized using descriptive statistics (Phases 2AB, 3) and a thematic content analysis will be used to identify themes that emerge from the data (Phase 2AB). A process evaluation will be used to assess the feasibility of implementation of the intervention and a preliminary efficacy evaluation will be undertaken focusing on the outcomes of pain and HRQoL (Phase 3).

**Ethics and dissemination** Ethics approval was obtained from the University of Toronto (36415, November 26<sup>th</sup>, 2018). We will disseminate knowledge of HEARTPA♀N through publication,

1  
2 conference presentation and national public forums (Café Scientifiques), and through fact sheets,  
3  
4 Tweets, and webinars.  
5

6  
7 **Trial Registration Number** NTC03800082, containing all items from the World Health  
8

9 Organization Trial Registration Data Set  
10  
11  
12  
13  
14  
15  
16  
17  
18  
19  
20  
21  
22  
23  
24  
25  
26  
27  
28  
29  
30  
31  
32  
33  
34  
35  
36  
37  
38  
39  
40  
41  
42  
43  
44  
45  
46  
47  
48  
49  
50  
51  
52  
53  
54  
55  
56  
57  
58  
59  
60

For peer review only



## Strengths and limitations of this study

- Patient partners have helped to define the HEARTPA♀N research agenda
- We are using the individual and family self-management theory, mobile device functionality and the pervasive information architecture of mHealth interventions, and following the sequential phased approach recommended by the Medical Research Council (MRC) to develop and evaluate the HEARTPA♀N application
- There is a co-intervention risk, but we will track and report other strategies women use to manage their pain at home

## INTRODUCTION

Coronary artery disease (CAD) differs between women and men in terms of pathophysiology/ risk, clinical presentation, diagnosis and prognosis.<sup>1</sup> The clinical presentation of CAD in women is much more subtle and varied compared to that of men;<sup>1,2</sup> this makes it difficult for women and healthcare providers (HCPs) to interpret and diagnose.<sup>3-6</sup> Women describe cardiac pain as sharp or burning with symptoms of breathlessness, fatigue, and discomfort in the jaw and/or shoulders.<sup>3</sup> Gendered roles and responsibilities for family/children cause delays in diagnosis for women and many women prefer to discuss their symptoms with family and friends before seeking assessment with their HCP or at the emergency department (ED).<sup>7</sup> Compared to men, women have more non-obstructive CAD<sup>5</sup> and a higher prevalence of clinically relevant cardiac pain/cardiac pain symptoms after PCI<sup>8</sup> and cardiac surgery.<sup>9-12</sup> Women who present with persistent and recurrent cardiac pain/cardiac pain symptoms are frequent users of health care services<sup>13</sup> and at risk for impaired function, depression, poor health-related quality of life (HRQoL), and death.<sup>14</sup>

Supporting women to recognize and manage cardiac pain and symptoms associated with CAD is vital to lower risk of major adverse cardiac events.<sup>15</sup> Self-management programs allow people to take an active part in the management of their own conditions<sup>16</sup> and are important predictors of successful behavior change.<sup>17</sup> In addition to reducing pain, self-management programs improve HRQoL.<sup>18-23</sup> A current mixed methods systematic review of self-management programs (HEARTPA♀N, *Phase 1*), which included women greater than 18 years of age with cardiac pain, found self-management interventions for cardiac pain were more effective if they included a greater proportion of women ( $p=0.02$ ), goal setting ( $p=0.03$ ) and collaboration/support from HCPs ( $p=0.01$ ).<sup>24</sup> Mobile health (mHealth) technologies have been developed to help women self-manage weight,<sup>25-29</sup> increase physical activity,<sup>30</sup> monitor for perinatal depression, and assist with postpartum smoking cessation.<sup>31</sup> Many women view mobile health technologies as

1  
2 novel and supportive,<sup>25</sup> and indicate these technologies motivate healthy behaviors, reduce  
3  
4 symptoms,<sup>32</sup> and improve HRQoL.<sup>32</sup> Health app usage is on the rise,<sup>33</sup> yet there is little objective  
5  
6 rigorous research evaluating outcomes of smartphone-based interventions.<sup>34,35</sup> The benefits of  
7  
8 mHealth interventions in healthcare are compelling; smartphones are portable, they offer  
9  
10 connectivity, and they provide access to women who are difficult to reach, yet no smartphone or  
11  
12 web-based self-management program has been developed and tested with women who have  
13  
14 cardiac pain.  
15

## 16 17 18 **OBJECTIVES**

19  
20 The overall goal of this program of research is to develop and systematically evaluate an  
21  
22 integrated smartphone and web-based intervention (HEARTPA♀N) to provide evidence-  
23  
24 informed symptom triage and self-management support to reduce pain and increase HRQoL in  
25  
26 women with cardiac pain and cardiac pain symptoms. Specific objectives for each phase of  
27  
28 development/evaluation include: 1) develop the HEARTPA♀N architecture (*Phase 2A*), 2)  
29  
30 conduct usability testing (*Phase 2B*), and 3) assess feasibility in terms of implementation (accrual  
31  
32 rates, acceptability and level of engagement) and determine an initial estimation of effectiveness  
33  
34 outcomes (estimates of magnitude of effect) in a pilot RCT (*Phase 3*). The Phase 3 pilot study  
35  
36 will enable us to refine the prototype, inform the methodology, and calculate the sample size for a  
37  
38 larger multi-site RCT (*Phase 4*, future work).  
39  
40  
41  
42

## 43 **METHODS AND ANALYSIS**

### 44 45 **Phases 2A and 2B**

46  
47 We are using the individual and family self-management theory,<sup>36,37</sup> mobile device functionality  
48  
49 and the pervasive information architecture of mHealth interventions,<sup>38</sup> and following the  
50  
51 sequential phased approach recommended by the Medical Research Council (MRC)<sup>39-41</sup> and used  
52  
53 by Stinson and others<sup>41,42</sup> to develop HEARTPA♀N. We will develop the HEARTPA♀N  
54  
55  
56  
57  
58  
59  
60

1  
2 architecture and conduct usability testing (*Phases 2A* and *2B*) to ensure it is easy to use, efficient  
3  
4 and satisfying to operate.  
5

### 6 ***Study design***

7  
8 Focus group interviews in *Phase 2A* will assist to: 1) learn about the experiences and health care  
9  
10 needs of women with cardiac pain from the perspectives of women and their HCPs, and 2) design  
11  
12 content and the core architecture of HEARTPA♀N. This core architecture will include evidence-  
13  
14 informed symptom triage algorithms to help women recognize their cardiac pain and cardiac pain  
15  
16 symptoms and seek appropriate care. Additional functionalities will also include symptom  
17  
18 tracking, SMART goal-setting, interactive coping skills toolbox of self-management strategies,  
19  
20 and social support that is peer-based and/or provided by a health coach. The usability testing in  
21  
22 *Phase 2B* will focus on user performance (ease of use, efficiency, ease of learning, and errors)  
23  
24 and satisfaction with program content and functionality (reports, goal setting)<sup>43</sup>. HEARTPA♀N  
25  
26 will be developed using key input from women with cardiac pain and cardiac pain symptoms.  
27  
28  
29  
30  
31

### 32 ***Eligibility criteria for Phases 2A and 2B***

33  
34 Women greater than 18 years of age with obstructive/non-obstructive CAD pain and/or  
35  
36 pain/symptoms post PCI/cardiac surgery lasting greater than 3 months are eligible to participate.  
37  
38 All women will be required to speak and read English and will be excluded if they have severe  
39  
40 cognitive impairment assessed using the Six-Item Screener administered by telephone or in face-  
41  
42 to-face interview,<sup>44,45</sup> or major comorbid medical or psychiatric illness that could preclude their  
43  
44 ability to participate in an interview. HCPs such as physicians and nurses who have worked in  
45  
46 cardiology, cardiac surgery and adult multidisciplinary chronic pain clinics for at least one year  
47  
48 will be excluded, as well as trainees, whose presence in the clinical setting is often transient.  
49  
50  
51

### 52 ***Study setting***

1  
2 *Phase 2A* one-hour focus group interviews will be scheduled at a mutually convenient time for  
3  
4 participants, and conducted by telephone, using ZOOM online video conferencing, or face-to-  
5  
6 face in a location suitable to participants and free from distractions.<sup>46</sup> *Phase 2B* participants will  
7  
8 complete a one-on-one observation for 60-90 minutes in a quiet room within the labs at  
9  
10  
11 Healthcare Human Factors in Toronto, Ontario, Canada.

### 12 13 ***Procedures***

14  
15 *Phase 2A.* Following ethics approval, a purposive sample of 30 women with obstructive  
16  
17 (n=10)/non-obstructive (n=10)] CAD pain and post PCI/cardiac surgery pain (n=10) will be  
18  
19 recruited for focus group interviews through cardiology, cardiac surgery and pain clinics, social  
20  
21 media platforms (e.g., Twitter, Facebook), and through database mailouts. HCPs (n=10) will also  
22  
23 be recruited for a separate focus group interview via letters and emails. Interested participants  
24  
25 will contact the project coordinator, who will screen all participants as per the eligibility criteria  
26  
27 and when eligibility is confirmed, informed consent will be obtained either via mail or using a  
28  
29 secure link to the online consent form available from the secure Hosted in Canada Surveys server  
30  
31 (Appendix). We will use a semi-structured interview guide to explore the views, experiences and  
32  
33 beliefs/motivations<sup>46</sup> of women with cardiac pain/cardiac pain symptoms and their HCPs.  
34  
35 Interviews will be conducted by two team members experienced in conducting interviews and  
36  
37 techniques will be used to minimize power differentials, such as establishing rapport, active  
38  
39 listening, and relaxed body language.<sup>47</sup>

40  
41  
42  
43  
44  
45 *Phase 2B.* A purposive sample of 15 women will be recruited through cardiology, cardiac surgery  
46  
47 and pain clinics, social media platforms (e.g., Twitter, Facebook), and through database mailouts.  
48  
49 Interested participants will contact the project coordinator, who will screen all participants as per  
50  
51 the eligibility criteria and when eligibility is confirmed, informed consent will be obtained either via  
52  
53 mail or using a secure link to the online consent available from the Hosted in Canada Surveys  
54  
55  
56  
57  
58  
59  
60

server (Appendix). Based on previous experience<sup>48-50</sup> and recommendations that usability testing by 3 - 5 users finds approximately 85% of interface usability problems,<sup>51,52,74</sup> each usability cycle will include 5 end-users (per pain type – obstructive [n=5]/non-obstructive [n=5] CAD, and pain post PCI/cardiac surgery [n=5]). Women will be provided with a brief explanation of the HEARTPA♀N intervention and then asked to move through standardized scenarios and list of features including the about you, diary, goal setting features, graphics, audio and video clips, and interactive components (reporting, symptom triage algorithms, self-management skills). We will employ a ‘think aloud’ approach<sup>53</sup> to gather insight into the way users solve problems as they move through the application and the website in a systematic way. Comments will be recorded, and the project coordinator will make field notes about any problems encountered on the Usability Testing Error and Efficiency Documentation Form. At the end of the session, participants will be asked to complete the System Usability Scale (SUS).<sup>54</sup> The SUS has been used across a wide range of user interfaces, including Web pages and Web applications.<sup>55</sup> The ten 5-point Likert questions can be scored to provide a point estimate of usability with a reported reliability of 0.85.<sup>55</sup> In addition, four semi-structured questions will be asked to determine users’ overall impression of HEARTPA♀N, what they liked and why, what could be improved, and if anything was missing.<sup>50</sup> Observations will be conducted in iterative cycles. After the first cycle, changes will be made to the interface based on comments from the content analysis of the audiotapes and field notes. The revised user interface will then be evaluated in a subsequent cycle. These iterations usually require 2-3 testing cycles with each end-user group until no further comments are identified.<sup>50,51,56</sup>

### ***Outcomes***

We will use the information obtained from our integrated mixed methods systematic review (*Phase 1*, previously published)<sup>24,57,58</sup> and the results from focus group interviews (*Phase 2A*) to

1 discuss HEARTPA♀N design concepts with HCPs and women who have cardiac pain in four 3-4  
2 hour consensus conference workshops with our Human Factors Designers. HEARTPA♀N will  
3  
4 be designed for a consistent experience for women, and developed on a web-based platform, with  
5  
6 easy access on any device with a web-browser, including smartphones and tablets.<sup>59,60</sup>  
7  
8 HEARTPA♀N's web-based approach will allow for faster maintenance, easier updates to  
9  
10 content, as well as improved accessibility for users.<sup>61</sup> All HEARTPA♀N content will be written  
11  
12 at a grade 5 to 6 reading level.<sup>62</sup> Women with cardiac pain/cardiac pain symptoms will participate  
13  
14 in realistic scenarios in a simulated environment (*Phase 2B*) in order to assess the appropriateness  
15  
16 and ease of use of HEARTPA♀N prior to the *Phase 3* pilot RCT.  
17  
18  
19  
20  
21

### 22 **Phase 3**

23 The HEARTPA♀N intervention is the first of its kind; there are no previous trials of the efficacy  
24  
25 of such an intervention to decrease pain and improve HRQoL in women with cardiac pain. We  
26  
27 will undertake a process and preliminary effect evaluation of the HEARTPA♀N intervention for  
28  
29 women with cardiac pain, as guided by the MRC framework.<sup>39-41</sup> The guidelines for Inclusion of  
30  
31 Patient-Reported Outcomes in Clinical Trial Protocols (SPIRIT-PRO)<sup>63</sup> are used to report the  
32  
33 protocol for this pilot RCT; trial registration number NTC03800082, containing all items from  
34  
35 the World Health Organization Trial Registration Data Set (Appendix).<sup>64</sup>  
36  
37  
38  
39  
40

### 41 ***Study design***

42 A two group parallel single blind pilot RCT.

### 43 ***Eligibility criteria***

44 Inclusion/ exclusion criteria have been previously described (*Phases 2A and 2B*). Additional  
45  
46 exclusion criteria will include women who participated in Phase 2A or 2B studies.  
47  
48  
49  
50  
51

### 52 ***Study setting***

1  
2 Participants will attend one in-person session to learn about the trial, obtain informed written  
3  
4 consent, and complete demographic, clinical and baseline measures (T1). Participants allocated to  
5  
6 the intervention group will also learn how to use the HEARTPA♀N intervention. The  
7  
8 intervention will be delivered on restricted password-protected applications.  
9

### 10 11 ***Procedures***

12  
13 Following ethics approval, a single coordinating center (University of Toronto) will recruit  
14  
15 women using methods described previously (*Phases 2A and 2B*). Interested participants will  
16  
17 contact the project coordinator by telephone or email. Eligibility criteria will be confirmed,  
18  
19 mailed or online consent (using a secure link sent to Hosted in Canada surveys server) obtained  
20  
21 (Appendix), and an appointment for an initial study visit will be made. The project coordinator  
22  
23 will track the number of eligible participants approached and reasons for refusal using a study  
24  
25 log. We will use multiple methods to promote recruitment and retention, such as reimbursing  
26  
27 participants for travel costs related to the initial study visit and reimbursing for use of their  
28  
29 smartphone and data plan (\$85) for the duration of the study. The project coordinator will send  
30  
31 email and postcard reminders and at 3 months, participants will be telephoned (standardized  
32  
33 script) to complete post-test measures online at home. Gift cards will be provided at study  
34  
35 completion (\$25). We anticipate minimal loss to follow-up as reported in previous pilot studies.<sup>65</sup>  
36  
37 However, daily reporting for 3 months may be burdensome for women, which we will assess in  
38  
39 our process evaluation. The project coordinator will also be available to address questions, issues,  
40  
41 and concerns without delay and all T2 assessments will be completed online, eliminating the  
42  
43 need for participants to return to the study center.  
44  
45  
46  
47  
48  
49

50 ***Randomization.*** Following completion of baseline measures, participants will be  
51  
52 randomized to the control or intervention group at a 1:1 ratio in blocks of four stratified by type  
53  
54 of cardiac pain<sup>66,67</sup> (obstructive CAD, non-obstructive CAD, and post PCI/cardiac surgery).  
55  
56  
57  
58  
59



1  
2 Randomization will be managed centrally using a web-based randomization service  
3  
4 ([www.randomize.net/](http://www.randomize.net/)).  
5

6 **Allocation.** Participants allocated to the control group will receive the usual care and  
7 supports provided to women with cardiac pain, including usual clinic appointments and follow-  
8 up. With detailed informed consent procedures, it is expected that women will accept their group  
9 allocation following randomization. Participants randomized to the intervention group will  
10 consist of daily use of the HEARTPA♀N intervention, in addition to usual care, for a period of 3  
11 months. The HEARTPA♀N intervention will be delivered on restricted password-protected  
12 applications that will permit tracking of adherence (number of logins to app and website using  
13 Google Analytics). Participants will be encouraged to log-in to the pain diary app daily (via  
14 automated alerts) over the 3-month period to complete pain diary entries and develop and track  
15 their goals related to their pain, activities, sleep, emotions and medications. Participants will be  
16 directed to the project coordinator for technical problems.  
17  
18  
19  
20  
21  
22  
23  
24  
25  
26  
27  
28  
29  
30  
31

32 **Blinding.** It is not possible to blind the participants to group allocation due to the specific  
33 nature of the HEARTPA♀N intervention; however, a data analyst at the University of Toronto's  
34 Faculty of Nursing who is blinded to treatment allocation will conduct the analysis ensuring  
35 neutrality of the outcome assessment.  
36  
37  
38  
39  
40

#### 41 **Outcomes**

42 A process evaluation will be used to assess the feasibility of the implementation of the  
43 intervention. Recruitment and retention will be determined through the use of the study log,  
44 which will document each potential participant contacted, whether or not they chose to  
45 participate in the trial, reasons for non-participation, whether or not they completed follow-up  
46 assessments and reasons for dropout. Issues and/or difficulties encountered during trial  
47 implementation will be tracked. Adverse events will be recorded on an Adverse Event Form and  
48  
49  
50  
51  
52  
53  
54  
55  
56  
57  
58  
59  
60

1 engagement will be assessed using Google Analytics. We will assess acceptability and  
2 satisfaction at the end of the 3-month period in all participants in the intervention group using a  
3 modified Acceptability e-Scale (AES)<sup>68</sup>. A preliminary efficacy evaluation will also be  
4 undertaken focusing on the outcomes of pain and HRQoL. Pain will be measured using the Brief  
5 Pain Inventory-Short Form (BPI-SF), which rates pain severity and the degree to which pain  
6 interferes with mood, sleep, and other physical activities such as work, social activity and  
7 relations with others. It has good construct validity,<sup>69,70</sup> reliability is reported at 0.86 to 0.91,<sup>69</sup>  
8 and it has detected clinically important differences.<sup>9,65,71</sup> HRQoL will be measured using the SF-  
9 36v2<sup>TM</sup>, which contains 36 items and yields a score for each of the 8 domains of health: physical  
10 functioning, role limitations due to physical health (role-physical), bodily pain, general health  
11 perceptions, vitality, social functioning, role limitations due to emotional problems (role  
12 emotional), and mental health.<sup>72</sup> It has an internal consistency of 0.76 to 0.94<sup>73,74</sup> with construct,  
13 criterion and predictive validity.<sup>74</sup> A participant flow diagram is included in Figure 1.

31  
32 -Insert Figure 1-  
33

### 34 ***Sample size***

35  
36 As this is a pilot trial focused on feasibility and primary evaluation of efficacy, we are not testing  
37 for statistical significance.<sup>75</sup> To decide on a sample size, we used the confidence interval  
38 approach based on the feasibility outcomes of recruitment and retention. For a one-sided 95%  
39 confidence interval for the proportion of women recruited and a margin of error of 0.05 (the  
40 lower bound) we would need at least 81 participants to estimate an overall recruitment rate of  
41 0.70. A sample of n=49 would be needed to estimate an overall retention rate of 85%; however,  
42 to estimate retention separately in the intervention and control groups, we will need a total  
43 sample size of 98 (49\*2). As attrition is one of our measured feasibility outcomes, we have not  
44 accounted for it in the sample size calculations.  
45  
46  
47  
48  
49  
50  
51  
52  
53  
54  
55  
56  
57  
58  
59  
60

## ***Data management***

Data will be collected using surveys and the HEARTPA♀N application, and stored on password-protected servers. The trial steering committee includes all research and Patient Advisory Committee (PAC) team members. As this is a pilot trial, there is not a separate data monitoring and safety committee.

## ***Statistical methods***

***Process Evaluation.*** Prevalence of refusal, retention, engagement with the intervention and technical difficulties reported will be calculated, along with their 95% confidence intervals. Mean acceptability and satisfaction will be calculated from the total score of the Acceptability e-Scale, along with its standard deviation. We will record symptom descriptions and use of the symptom triage algorithms, what women did as a result of this recommendation (e.g., self-management, contact with primary HCP, ED visit). Qualitative process data collected will be analyzed using methods appropriate to the data obtained.

***Primary Effect Evaluation.*** We will investigate the variability and sensitivity to change for outcomes of pain and HRQoL (T2-T1). We will calculate the number of participants who report clinically meaningful decreases in pain, which has been defined for the BPI-SF as a two-point difference in worst pain.<sup>76</sup> Variability will be estimated using the mean/median scores and standard deviation, in each group separately, at pre and post-test. Similarly, sensitivity to change will be assessed by determining the number of participants who had a clinically meaningful increase in HRQoL scores over time. Although the study will not be powered to detect significant differences, we will use multiple regression to estimate the effect of group allocation on each outcome (separately) at post-test, adjusting for baseline scores. This will help determine the magnitude and direction of effect and provide a signal of the intervention's effectiveness. The

1  
2 analysis will be conducted using an intent-to-treat approach. As this is a pilot trial, no interim  
3  
4 analyses are planned.  
5

## 6 **PATIENT AND PUBLIC INVOLVEMENT**

7  
8 Seven women (LC, CA, CF, DP, MP, BR, VSD) with cardiac pain form the HEARTPA♀N  
9 Patient Advisory Committee (PAC). They were actively involved in *Phase 1* of this research  
10 program (e.g., defining search terms for our systematic review) and continue to be actively  
11 involved in setting the HEARTPA♀N research agenda for *Phases 2A, 2B and 3*. This includes  
12 assisting to define the scope of the project (e.g., defining patient-reported outcome measures  
13 [PROMs] for the pilot RCT), active involvement in recruitment activities, assisting to write  
14 project quarterly newsletters, and participation in all team meetings. They will be invited to be  
15 co-presenters at scientific conference meetings and public forums (Café Scientifiques) and will  
16 assist to write lay summaries and fact sheets for each phase of our project.  
17  
18  
19  
20  
21  
22  
23  
24  
25  
26  
27  
28

## 29 **ETHICS AND DISSEMINATION**

30  
31 Ethics approval was obtained from the University of Toronto (36415, November 26<sup>th</sup>, 2018). Any  
32 protocol modifications will be submitted as an amendment to the University of Toronto research  
33 ethics board and to the NIH clinical trials registry NTC03800082. This is a 3-year study, Phase  
34 2A recruitment began in March 2019. Informed consent will be obtained from all participants. To  
35 ensure privacy during the pilot RCT, all personally identifying information will be stored on a  
36 separate database from health data on the HEARTPA♀N application. Information that is sent to  
37 the smartphone or used by the reporting system will be independent of participants' personal  
38 information. No personal information will be transmitted after the initial set-up. For security  
39 issues, information that is transmitted will be sent securely via encrypted HTTPS connection,  
40 preventing interception by a third party. All electronic entries will be backed up on a central  
41 server and communication with the central database server will occur through secure Internet  
42  
43  
44  
45  
46  
47  
48  
49  
50  
51  
52  
53  
54  
55  
56  
57  
58  
59  
60

1 connections. Only the principal investigator and project coordinator will have access to the data.

2  
3  
4 We will disseminate knowledge of HEARTPA♀N through publication, conference presentation  
5  
6 and educational national public forums (Café Scientifiques), and through fact sheets, Tweets, and  
7  
8 webinars posted in the Women's Xchange Knowledge Translation and Exchange Centre as well  
9  
10 as to key stakeholders and programs.  
11  
12  
13  
14  
15  
16  
17  
18  
19  
20  
21  
22  
23  
24  
25  
26  
27  
28  
29  
30  
31  
32  
33  
34  
35  
36  
37  
38  
39  
40  
41  
42  
43  
44  
45  
46  
47  
48  
49  
50  
51  
52  
53  
54  
55  
56  
57  
58  
59  
60

1  
2 **Acknowledgements** We would like to thank the PAC (Cooper, Auld, Faubert, Park, Park,  
3  
4 Rickard, DeBonis) for their active involvement in setting the HEARTPA♀N research agenda,  
5  
6 including providing letters of support and defining patient-oriented outcome measures (PROMs)  
7  
8 for the pilot RCT. We would also like to thank the Human Factors Designers (Lovas, Parente,  
9  
10 Uddin) from the Centre for Global eHealth Innovation who are actively involved in this project,  
11  
12 as well as the Heart and Stroke Foundation for supporting HEARTPA♀N and working together  
13  
14 to share the findings and the products generated from our work. The Women's Xchange will  
15  
16 provide ongoing sex and gender consultative support throughout the project, opportunities for  
17  
18 trainees to learn more about sex and gender integration in health research, and also assist with  
19  
20 knowledge translation and exchange.  
21  
22  
23  
24  
25

26 **Author Contributions** The PI (Parry) and Co-PI (Clarke) will provide day-to-day oversight of  
27  
28 the trial. The remaining co-applicants will assist as follows: REB submissions (Dhukai,  
29  
30 Patterson, Price), recruitment (Dhukai, Cooper, Harvey, Norris, Patterson, PAC members), data  
31  
32 collection (Bjoernnes, Dhukai, Pink, Patterson, Price), data analyses (Bjoernnes, Leegaard, Parry,  
33  
34 Victor), and KTE (publication – trial steering committee; conference and public presentations -  
35  
36 Parry, Bjoernnes, Clarke, Dhukai, PAC Members; website [Women's Xchange - Harvey, Price];  
37  
38 Tweets/Fact Sheets/Webinars – project coordinator, HSFC). The project coordinator (Leyden)  
39  
40 will provide day-to-day management throughout all phases of this program of research.  
41  
42  
43

44 Authorship will be determined by substantive contribution to the design, conduct, interpretation  
45  
46 across all phases of this program of research as per the International Committee of Medical  
47  
48 Journal Editors.<sup>77</sup> There is no plan to utilize a professional writer.  
49  
50  
51

52 **Funding** This work was supported by a Canadian Institutes of Health Research (CIHR) Project  
53  
54 Grant Fall 2017 competition (389044), Ottawa, Ontario, Canada.  
55  
56  
57  
58  
59  
60

1  
2 **Competing interests** None declared.  
3

4 **Supplemental material** Consents for Phases 2A, 2B and 3.  
5

6 **Data sharing statement** The trial protocol and full study report will be made publicly available  
7  
8 through open access publication.  
9  
10  
11  
12  
13  
14  
15  
16  
17  
18  
19  
20  
21  
22  
23  
24  
25  
26  
27  
28  
29  
30  
31  
32  
33  
34  
35  
36  
37  
38  
39  
40  
41  
42  
43  
44  
45  
46  
47  
48  
49  
50  
51  
52  
53  
54  
55  
56  
57  
58  
59  
60

For peer review only

## REFERENCES

1. Baart S, Dam V, Scheres L, et al. Cardiovascular risk prediction models for women in the general population: A systematic review. *PLoS ONE*. 2019;14(1).
2. Bairey Merz C, Shaw L, Reis S, et al. Insights from the NHLBI-sponsored Women's Ischemia Syndrome Evaluation (WISE) study: part II: gender differences in presentation, diagnosis, and outcome with regard to gender-based pathophysiology of atherosclerosis and macrovascular and microvascular coronary disease. *J Am Coll Cardiol*. 2006;47:S21-S29.
3. Canto J, Canto E, Goldberg R. Time to standardize and broaden the criteria of acute coronary symptoms presentations in women. *Canadian Journal of Cardiology*. 2014;30:721-728.
4. Kirchberger I, Heier M, Wende R, von Scheidt W, Meisinger C. The patient's interpretation of myocardial infarction symptoms and its role in the decision process to seek treatment: the MONICA/KORA Myocardial Infarction Registry. *Clin Res Cardiol*. 2012;101:909-916.
5. Pepine C, Ferdinand K, Shaw L, et al. Emergence of Nonobstructive Coronary Artery Disease: A Woman's Problem and Need for Change in Definition on Angiography. *Journal of the American College of Cardiology*. 2015;66(17):1918-1933.
6. von Eisenhart Rothe A, Albarqouni L, Gartner C, Walz L, Smenes K, Ladwig K. Sex specific impact of prodromal chest pain on pre-hospital delay time during an acute myocardial infarction: Findings from the multicenter MEDEA Study with 619 STEMI patients. *International Journal of Cardiology*. 2015;201:581-586.



- 1  
2 7. Sjostrom-Strand A, Fridlund B. Women's descriptions of symptoms and delay reasons in  
3 seeking medical care at the time of a first myocardial infarction: A qualitative study.  
4  
5  
6  
7 *International Journal of Nursing Studies*. 2008;45:1003-1010.
- 8  
9 8. Kok M, van der Heijden L, Sen H, et al. Sex differences in chest pain after implantation  
10 of newer generation coronary drug-eluting stents: A patient-level pooled analysis from the  
11 TWENTE and DUTCH PEERS trials. *JACC Cardiovascular Interventions*.  
12  
13  
14  
15  
16 2016;9(6):553-561.
- 17  
18 9. Parry M, Watt-Watson J, Hodnett E, Tranmer J, Dennis C, Brooks D. Pain Experiences of  
19 Men and Women after Coronary Artery Bypass Graft Surgery. *Journal of Cardiovascular*  
20  
21  
22  
23  
24 *Nursing*. 2010;25(3):E9-15.
- 25  
26 10. King KM, Parry M, Southern D, Faris P, Tsuyuki RT. Women's Recovery from  
27 Sternotomy-Extension (WREST-E) study: examining long-term pain and discomfort  
28 following sternotomy and their predictors. *Heart*. 2008;94(4):493-497.
- 29  
30  
31  
32 11. Bjørnnes A, Parry M, Lie I, et al. Pain experiences of men and women after cardiac  
33 surgery. *Journal of Clinical Nursing*. 2016.
- 34  
35  
36  
37 12. Choiniere M, Watt-Watson J, Victor J, et al. Prevalence of and risk factors for persistent  
38 postoperative nonanginal pain after cardiac surgery: a 2-year prospective multicentre  
39 study. *CMAJ*. 2014;186(7):e213-e223.
- 40  
41  
42  
43 13. Arthur H, Campbell P, Harvey P, et al. Women, Cardiac Syndrome X, and Microvascular  
44 Heart Disease. *Canadian Journal of Cardiology*. 2012;28:S42-S49.
- 45  
46  
47  
48 14. Altintas E, Yigit F, Taskintuna N. The impact of psychiatric disorders with cardiac  
49 syndrome X on quality of life: 3 months prospective study. *International Journal of*  
50  
51  
52  
53  
54  
55  
56  
57  
58  
59  
60 *Clinical and Experimental Medicine*. 2014;7(10):3520-3527.

15. Hindieh W, Pilote L, Cheema A, et al. Association Between Family History, a Genetic Risk Score, and Severity of Coronary Artery Disease in Patients with Premature Acute Coronary Syndromes. *Thromb Vasc Biol.* 2016;36:1286-1292.
16. Lorig K, Holman H. Self-management education: history, definition, outcomes, and mechanisms. *Annals of Behavioral Medicine.* 2003;26(1):1-7.
17. Bandura A. Self-efficacy: Toward a unifying theory of behavioral change. *Psychological Review.* 1977;84(2):191-215.
18. Johnston L, Foster M, Shennan J, Starkey N, Johnson A. The effectiveness of an acceptance and commitment therapy self-help intervention for chronic pain. *Clinical Journal of Pain.* 2010;26(5):393-402.
19. Mcgillion M, Arthur H, Victor J, Watt-Watson J, Cosman T. Effectiveness of psychoeducational interventions for improving symptoms, health-related quality of life, and psychological well being in patients with stable angina. *Current Cardiology Reviews.* 2008;4:1-11.
20. Perry K, Nicholas M, Middleton J. Multidisciplinary cognitive behavioural pain management programmes for people with a spinal cord injury: design and implementation. *Disability Rehabilitation Journal.* 2011;33(13):1272-1280.
21. Naylor M, Keefe F, Brigidi B, Naud S, Helzer J. Therapeutic interactive voice response for chronic pain reduction and relapse prevention. *Pain.* 2008;134(3):335-345.
22. Dysvik E, Kvaley J, Stokkeland R, Natvig G. The effectiveness of a multidisciplinary pain management programme managing chronic pain on pain perceptions, health-related quality of life and stages of change - a non-randomized controlled study. *International Journal of Nursing Studies.* 2010;47(7):826-835.

- 1  
2 23. Glombiewski J, Hartwich-Tersek J, Rief W. Two psychological interventions are effective  
3  
4 in severely disabled, chronic back pain patients: a randomized controlled trial.  
5  
6 *International Journal of Behavioral Medicine*. 2010;17(2):97-107.  
7  
8  
9 24. Parry M, Bjornnes A, Victor J, et al. Self-management interventions for women with  
10  
11 cardiac pain: A systematic review and meta-analysis. *Canadian Journal of Cardiology*.  
12  
13 2018;34:458-467.  
14  
15  
16 25. Knight-Agarwal C, Davis D, Williams L, Davey R, Cox R, Clark A. Development and  
17  
18 pilot testing of the eating4two mobile phone app to monitor gestational weight gain. *JMIR*  
19  
20 *Mhealth Uhealth*. 2015;3(2):e44.  
21  
22  
23 26. Willcox J, Campbell K, McCarthy E, et al. Testing the feasibility of a mobile technology  
24  
25 intervention promoting healthy gestational weight gain in pregnant women (txt4two)-  
26  
27 study protocol for a randomised controlled trial. *Trials*. 2015;16:1-8.  
28  
29  
30 27. Waring M, Moore Simas T, Xiao R, et al. Pregnant women's interest in a website or  
31  
32 mobile application for healthy gestational weight gain. *Sexual & Reproductive*  
33  
34 *HealthCare*. 2014;5(4):182-184.  
35  
36  
37 28. Fukuoka Y, Komatsu J, Suarez L, et al. The mPED randomized controlled clinical trial:  
38  
39 applying mobile persuasive technologies to increase physical activity in sedentary women  
40  
41 protocol. *BMC Public Health*. 2011;11:1-8.  
42  
43  
44 29. Thomas J, Wing R. Health-e-call, a smartphone-assisted behavioral obesity treatment:  
45  
46 pilot study. *JMIR Mhealth Uhealth*. 2013;1(1):e3.  
47  
48  
49 30. Llanos A, Krok J, Peng J, et al. Effects of a walking intervention using mobile technology  
50  
51 and interactive voice response on serum adipokines among postmenopausal women at  
52  
53 increased breast cancer risk. *Hormones and Cancer*. 2014;5(2):98-103.  
54  
55  
56  
57  
58  
59

- 1  
2 31. Wen K, Miller S, Kilby L, et al. Preventing postpartum smoking relapse among inner city  
3 women: development of a theory-based and evidence-guided text messaging intervention.  
4  
5  
6 *JMIR Research Protocols*. 2014;3(2):e20.  
7  
8  
9 32. Licskai C, Sands T, Ferrone M. Development and pilot testing of a mobile health solution  
10 for asthma self-management: asthma action plan smartphone application pilot study.  
11  
12 *Canadian Respiratory Journal*. 2013;20(4):301-306.  
13  
14  
15 33. CATALYST. Smartphone behaviour in Canada and the implications for marketers in  
16 2016. <http://catalyst.ca/2016-canadian-smartphone-behaviour/>. Published 2016. Accessed.  
17  
18  
19  
20 34. Silow-Carroll S, Smith B. Clinical management apps: Creating partnerships between  
21 providers and patients. 2013;30:1-10.  
22  
23  
24 35. McKay F, Cheng C, Wright A, Shill J, Stephens H, Uccellini M. Evaluating mobile phone  
25 applications for health behaviour change: A systematic review. *Journal of Telemedicine*  
26 and *Telecare*. 2018;24(1):22-30.  
27  
28  
29  
30  
31 36. Fawcett J, Watson J, Neuman B, Walker PH, Fitzpatrick JJ. On Nursing Theories and  
32 Evidence *Journal of Nursing Scholarship*. 2001;33(2):115-119.  
33  
34  
35  
36 37. Ryan P, Sawin KJ. The Individual and Family Self-Management Theory: Background and  
37 Perspectives on Context, Process, and Outcomes. *Nurs Outlook*. 2009;57(4):217-225.  
38  
39  
40  
41 38. Danaher B, Brendryen H, Seeley J, Tyler M, Woolley T. From black box to toolbox:  
42 Outlining device functionality, engagement activities, and the pervasive information  
43 architecture of mHealth interventions. *Internet Interventions*. 2014;2:91-101.  
44  
45  
46  
47 39. Craig P, Dieppe P, Macintyre S, Michie S, Nazareth I, Petticrew M. Developing and  
48 evaluation complex interventions: the new Medical Research Council guidance. *BMJ*.  
49 2008;337:1-6.  
50  
51  
52  
53  
54  
55  
56  
57  
58  
59  
60

- 1
  - 2
  - 3
  - 4
  - 5
  - 6
  - 7
  - 8
  - 9
  - 10
  - 11
  - 12
  - 13
  - 14
  - 15
  - 16
  - 17
  - 18
  - 19
  - 20
  - 21
  - 22
  - 23
  - 24
  - 25
  - 26
  - 27
  - 28
  - 29
  - 30
  - 31
  - 32
  - 33
  - 34
  - 35
  - 36
  - 37
  - 38
  - 39
  - 40
  - 41
  - 42
  - 43
  - 44
  - 45
  - 46
  - 47
  - 48
  - 49
  - 50
  - 51
  - 52
  - 53
  - 54
  - 55
  - 56
  - 57
  - 58
  - 59
  - 60
40. MRC. *A Framework for Development and Evaluation of RCTs fro Complex Interventions to Improve Health*. 2000.
41. Campbell MK, Fitzpatrick R, Haines A, et al. Framework for design and evaluation of complex interventions to improve health. *British Medical Journal*. 2000;321:694-696.
42. Danaher B, Seeley J. Methodological issues in research on Web-based behavioral interventions. *Annals of Behavioral Medicine*. 2009;38:28-39.
43. Holzinger A. Usability engineering methods for software developers. *Communications of the ACM*. 2005;48(1):71-74.
44. Callahan C, Unverzagt F, Hui S, Perkins A, Hendrie H. Six-Item Screener to Identify Cognitive Impairment Among Potential Subjects for Clinical Research. *Medical Care*. 2002;40(9):771-781.
45. Carpenter C, DesPain B, Keeling T, Shah M, Rothenberger M. The Six-Item Screener and SD8 for the Detection of Cognitive Impairment in Geriatric Emergency Department Patients. *Ann Emerg Med*. 2011;57(6):653-661.
46. Kvale S, Brinkmann S. *Interviews: Learning the craft of qualitative interviewing*. Los Angeles: Sage; 2015.
47. DiCicco-Bloom B, Crabtree B. The Qualitative Research Interview. *Medical Education*. 2006;40:314-321.
48. Jibb L, Stevens B, Nathan P, Cafazzo J, Stinson J. A smartphone-based pain management app for adolescents with cancer: Establishing system requirements and a pain care algorithm based on literature review, interviews, and consensus. *JMIR Research Protocols*. 2014;3(1):e15.

- 1  
2 49. Stinson J, Gupta A, Dupuis F, et al. Usability testing of an online self-management  
3  
4 program for adolescents with cancer. *Journal of Pediatric Oncology Nursing*.  
5  
6 2014;32(2):70-82.  
7  
8  
9 50. Breakey V, Warias A, Ignas D, White M, Blanchette V, Stinson J. The value of usability  
10  
11 testing for Internet-based adolescent self-management interventions: "Managing  
12  
13 Hemophilia Online". *BMC Medical Informatics and Decision Making*. 2013;13:113.  
14  
15  
16 51. Macefield R. How to specify the participant group size for usability studies: A  
17  
18 practitioner's guide. *Journal of Usability Studies*. 2009;5:34-45.  
19  
20  
21 52. Nielsen J, Landauer T. A Mathematical Model of the Finding of Usability Problems.  
22  
23 Paper presented at: Proceedings of ACM INTERCHI'93 Conference; 24-29 April 1993,  
24  
25 1993; Amsterdam, The Netherlands.  
26  
27  
28 53. Jaspers M. A comparison of usability methods for testing interactive health technologies:  
29  
30 Methodological aspects and empirical evidence. *Int J Med Inf*. 2009;78(5):340-353.  
31  
32  
33 54. Brooke J. A "quick and dirty" usability scale. In: Jordan P, Thomas B, Weerdmeester B,  
34  
35 McClelland I, eds. *Usability evaluation in industry*. London: Taylor & Francis; 1996.  
36  
37  
38 55. Bangor A, Kortum PT, Miller JT. An Empirical Evaluation of the System Usability Scale.  
39  
40 *International Journal of Human-Computer Interaction*. 2008;24(6):574-594.  
41  
42  
43 56. Kushniruk A. Evaluation in the design of health information systems: application of  
44  
45 approaches emerging from usability engineering. *Computers in Biology and Medicine*.  
46  
47 2002;32:141-149.  
48  
49  
50 57. Bjornnes A, Parry M, Leegaard M, et al. Self-management of cardiac pain in women: A  
51  
52 meta-summary of the qualitative literature. *Qualitative Health Research*. 2018:1-19.  
53  
54  
55 58. Parry M, Bjornnes A, Clarke H, et al. Self-management of cardiac pain in women: an  
56  
57 evidence map. *BMJ Open*. 2017;7.

- 1  
2 59. Biørn-Hansen A, Majchrzak T, Grønli T. Progressive Web Apps: The possible web-native  
3  
4 unifier for mobile development. Paper presented at: Proceedings of the 13th International  
5  
6 Conference on Web Information Systems and Technologies (WEBIST 2017)2017.  
7  
8  
9 60. Majchrzak T, Biørn-Hansen A, Grønli T. Progressive Web Apps: the Definite Approach  
10  
11 to Cross-Platform Development. Paper presented at: Proceedings of the 51st Hawaii  
12  
13 International Conference on System Sciences2018.  
14  
15  
16 61. Malavolta I. Beyond native apps: Web technologies to the rescue! . Paper presented at:  
17  
18 Mobile! '162016; Amsterdam, Netherlands.  
19  
20  
21 62. Cotugna N, Vickery C, Carpentier-Haefele K. Evaluation of literacy level of patient  
22  
23 education pages in health-related journals. *Journal of Community Health*.  
24  
25 2005;30(3):213-219.  
26  
27  
28 63. Calvert M, Kyte D, Mercieca-Bebber R, Slade A, Chan A, King M. Guidelines for  
29  
30 inclusion of patient-reported outcomes in clinical trial protocols: The SPIRIT-PRO  
31  
32 Extension. *JAMA*. 2018;319(5):483-494.  
33  
34  
35 64. WHO. WHO Data Set. World Health Organization.  
36  
37 <https://www.who.int/ictrp/network/trds/en/>. Published 2019. Accessed July 17, 2019.  
38  
39  
40 65. Parry M, Watt-Watson J, Hodnett E, Tranmer J, Dennis C-L, Brooks D. Cardiac Home  
41  
42 Education and Support Trial (CHEST): A pilot study. *Canadian Journal of Cardiology*.  
43  
44 2009;25(12):e393-e398.  
45  
46  
47 66. Suresh K. An overview of randomization techniques: An unbiased assessment of outcome  
48  
49 in clinical research. *J Hum Reprod*. 2011;4(1):8-11.  
50  
51  
52 67. Kernan W, Viscoli C, Makuch R, Brass L, Horwitz R. Stratified Randomization for  
53  
54 Clinical Trials. *Journal of Clinical Epidemiology*. 1999;52(1):19-26.  
55  
56  
57  
58  
59  
60

- 1  
2 68. Tariman J, Berry D, Halpenny B, Wolpin S, Schepp K. Validation and testing of the  
3  
4 Acceptability E-scale for web-based patient-reported outcomes in cancer care. *Applied*  
5  
6 *Nursing Research*. 2011;24(1):53-58.  
7  
8  
9 69. McDowell I, Newell C. *Measuring health: A guide to rating scales and questionnaires*.  
10  
11 Vol 2nd ed. New York: Oxford University Press; 1996.  
12  
13 70. Watt-Watson J, Stevens B, Katz J, Costello J, Reid G, David T. Impact of preoperative  
14  
15 education on pain outcomes after coronary artery bypass graft surgery. *Pain*.  
16  
17 2004;109:73-85.  
18  
19  
20 71. Watt-Watson J, Stevens B, Costello J, Katz J, Reid G. Impact of preoperative education  
21  
22 on pain management outcomes after coronary artery bypass graft surgery. *Canadian*  
23  
24 *Journal of Nursing Research*. 2000;31:41-56.  
25  
26  
27 72. Ware J, Kosinski M, Dewey J. How to score Version 2 of the SF-36 Health Survey: A  
28  
29 User's Manual. In. Boston: The Health Institute, New England Medical Center; 2002.  
30  
31  
32 73. Irvine D, O'Brien-Pallas L, Murray M, et al. The reliability and validity of two health  
33  
34 status measures for evaluation outcomes of home care nursing. *Research in Nursing &*  
35  
36 *Health*. 2000;23:43-54.  
37  
38  
39 74. Ware J. SF-36 Health Survey: Manual and Interpretation Guide. In. Boston: New  
40  
41 England Medical Center, The Health Institute; 1993.  
42  
43  
44 75. Thabane L, Ma J, Chu R, et al. A tutorial on pilot studies: the what, why and how. *BMC*  
45  
46 *Medical Research Methodology*. 2010;10.  
47  
48  
49 76. Mathias S, Crosby R, Qian Y, Jiang QW, Dansey R, Chung K. Estimating minimally  
50  
51 important differences for the worst pain rating of the Brief Pain Inventory-Short Form. *J*  
52  
53 *Support Oncol*. 2011;9(2):72-78.  
54  
55  
56  
57  
58  
59  
60



1  
2  
3  
4  
5  
6  
7  
8  
9  
10  
11  
12  
13  
14  
15  
16  
17  
18  
19  
20  
21  
22  
23  
24  
25  
26  
27  
28  
29  
30  
31  
32  
33  
34  
35  
36  
37  
38  
39  
40  
41  
42  
43  
44  
45  
46  
47  
48  
49  
50  
51  
52  
53  
54  
55  
56  
57  
58  
59  
60

77. ICMJE. International Committee of Medical Journal Editors. ICMJE.  
<http://www.icmje.org/>. Published 2019. Accessed July 18, 2019.

For peer review only

1  
2  
3 *Figure 1.* Anticipated participant flow through in pilot RCT.  
4  
5  
6  
7  
8  
9  
10  
11  
12  
13  
14  
15  
16  
17  
18  
19  
20  
21  
22  
23  
24  
25  
26  
27  
28  
29  
30  
31  
32  
33  
34  
35  
36  
37  
38  
39  
40  
41  
42  
43  
44  
45  
46  
47  
48  
49  
50  
51  
52  
53  
54  
55  
56  
57  
58  
59  
60

For peer review only

1  
2  
3  
4  
5  
6  
7  
8  
9  
10  
11  
12  
13  
14  
15  
16  
17  
18  
19  
20  
21  
22  
23  
24  
25  
26  
27  
28  
29  
30  
31  
32  
33  
34  
35  
36  
37  
38  
39  
40  
41  
42  
43  
44  
45  
46  
47  
48  
49  
50  
51  
52  
53  
54  
55  
56  
57  
58  
59  
60

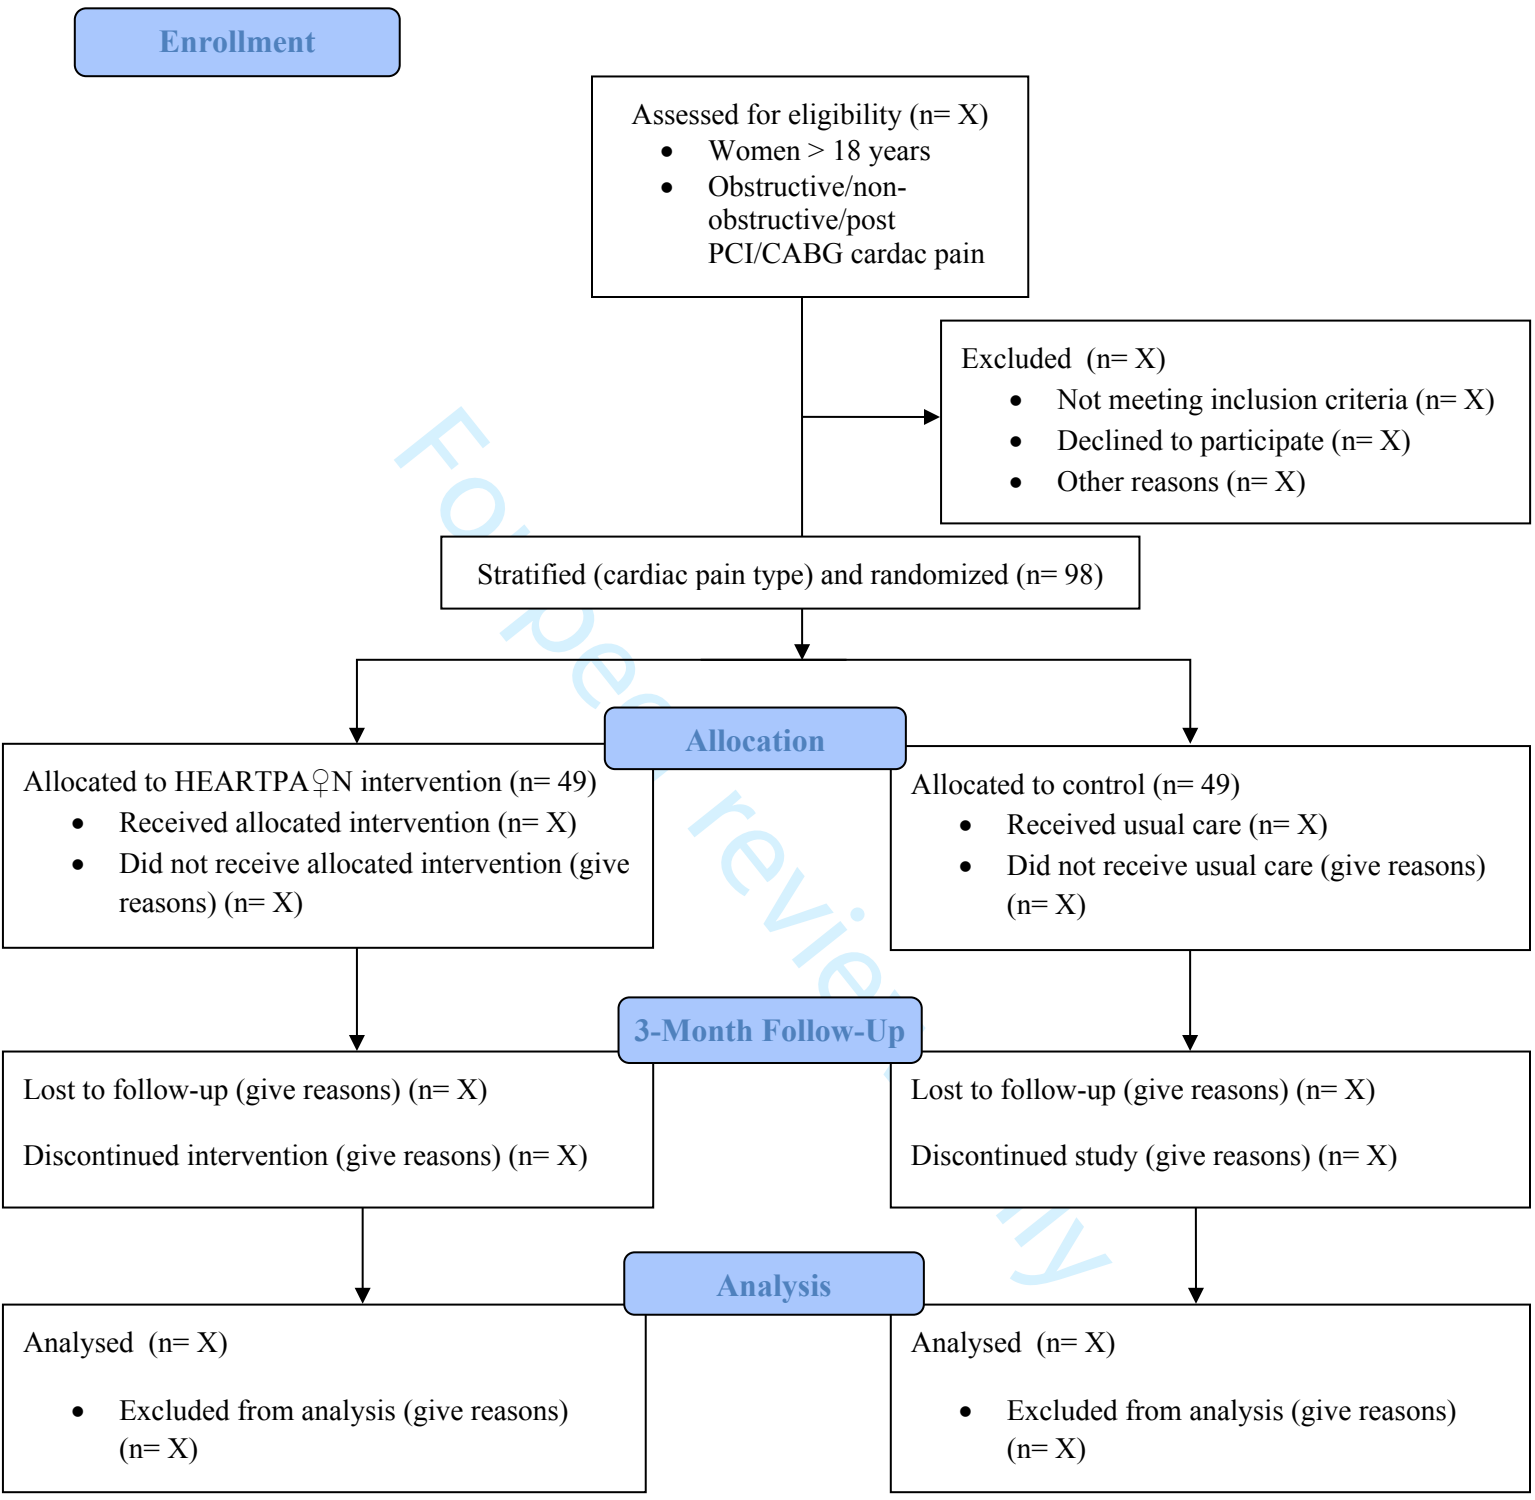

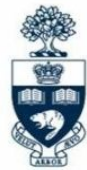

**BLOOMBERG**  
LAWRENCE S. BLOOMBERG  
FACULTY OF NURSING  
UNIVERSITY OF TORONTO

**Participant Information and Consent Form  
Study 1**

---

**Principal Investigator:**

**Dr. Monica Parry, Lawrence S. Bloomberg Faculty of Nursing, University of Toronto**

**Phone: (416) 946 – 3561**

**Email: [women.heartpain@utoronto.ca](mailto:women.heartpain@utoronto.ca)**

---

**Co-Investigators:**

Dr. Hance Clarke - University Health Network  
Dr. Ann Kristin Bjørnnes – Oslo Metropolitan University  
Dr. Joseph Cafazzo – University Health Network  
Ms. Abida Dhukai – University of Toronto  
Dr. Paula Harvey – Women’s College Hospital  
Dr. Joel Katz – York University  
Dr. Chitra Lalloo – Hospital for Sick Children  
Dr. Marit Leegaard – Oslo Metropolitan University  
Dr. France Légaré - Université Laval  
Dr. Judith McFetridge-Durdle – Florida State University  
Dr. Michael McGillion – McMaster University  
Dr. Colleen Norris – University of Alberta  
Ms. Rose Patterson – Anishnawbe Health Toronto  
Dr. Louise Pilote – Research Institute of the McGill University Health Centre  
Ms. Leah Pink – Sinai Health System  
Dr. Jennifer Price – Women’s College Hospital  
Dr. Jennifer Stinson – Hospital for Sick Children  
Mr. J. Charles Victor – University of Toronto  
Dr. Judy Watt-Watson – Lawrence S. Bloomberg Faculty of Nursing  
Ms. Carol Auld – Patient Advisor  
Ms. Lynn Cooper – Patient Advisor  
Ms. Christine Faubert – Patient Advisor  
Ms. Deborah Park – Patient Advisor  
Ms. Marianne Park – Patient Advisor  
Ms. Beatrice Rickard – Patient Advisor  
Ms. Vincenza Spiteri DeBonis – Patient Advisor

**Title of Project:** Development and Usability Testing of HEARTPAIN: An Integrated Smartphone and Web-Based Intervention for Women with Cardiac Pain

**Purpose and Background**

More women die of coronary artery disease (CAD) than cancer, chronic lower respiratory disease, Alzheimer’s disease, and accidents combined. Coronary artery disease is also the leading cause of death of women across all ages, and recent data show an increase in CAD incidence and deaths in

women younger than 55 years of age. Women with CAD have cardiac pain that differs from that of men. The overall goal of this program of research is to develop and assess a HEARTPAIN app and website that will help women self-manage cardiac pain. Feedback from women is a necessary step to designing HEARTPAIN.

### **Procedures**

If I agree to participate in this study, I understand that the following things will happen:

1. I will be asked to complete a baseline demographic form describing my age, education, employment, type and duration of cardiac pain etc. To protect my privacy and confidentiality, I will have a study ID number instead of my name on the form.
2. I will participate in a discussion group session (face-to-face or by free video/web conferencing) for approximately one hour that may involve 4 to 9 other women who have cardiac pain. Their cardiac pain may be similar or different from the cardiac pain that I experience. The session will be audiotaped and to protect my privacy and anonymity, my last name will not be used. All audio and transcribed files will be kept on the secure server at Bloomberg Nursing and only the PI (Parry) and Project Coordinator (Leyden) will have access to the password-protected server. Study data will be kept for seven years and then destroyed.
3. I understand that I can volunteer to participate in the 2-day consensus conference.
4. I understand that I can volunteer to participate in future studies as HEARTPAIN is developed/tested.

### **Potential Benefits**

I understand that by participating in this study that there may be no direct benefits. However, I understand that by participating in this study I may have a better understanding of my cardiac pain. I may also become more aware of cardiac pain in other women.

I understand that I can get a plain language summary of the study results by checking the box below:

- I would like a copy of a plain language summary of the study results sent to me in an email link.

### **Potential Risks**

I understand that there are no known risks to participating in this study. If I find that the discussion group upsets me, I can discuss this with the researchers who are conducting this study. I can have the option of a one-to-one telephone interview.

If you experience medical distress during a discussion group session, we ask that you let the facilitator know about your distress and medical attention will be sought.

### **Cost**

I understand that there is no charge for participating in this study. I may incur transportation and/or parking costs and these will be reimbursed as outlined in the financial compensation section.

### **Financial Compensation**

I understand that if I need to travel within the GTA to participate in a discussion group my transportation costs will be reimbursed (e.g., TTC tokens, parking), in accordance with University of

1  
2 Toronto's reimbursement to participant guidelines. I also understand if I attend the 2-day consensus  
3 conference that my transportation costs will be covered (e.g., TTC tokens, parking, economy travel), in  
4 accordance with University of Toronto's reimbursement to participant guidelines. [Participant  
5 guidelines for study reimbursements: [http://www.research.utoronto.ca/policies-and-  
6 procedures/compensation-and-reimbursement-of-research-participants/](http://www.research.utoronto.ca/policies-and-procedures/compensation-and-reimbursement-of-research-participants/)]. Original receipts and/or paid  
7 invoices will be required before payment is provided.  
8  
9

### 10 **Confidentiality**

11 I understand that information about specific individuals in this study will be kept strictly confidential  
12 and will not be available to anyone except the Principal Investigator (PI) and members of the  
13 investigative team. Only an identification number will appear on the demographic questionnaires, and  
14 therefore my responses will remain anonymous. One copy of my name and my study identification  
15 number will be kept in a locked drawer in the researcher's office. No one but Dr. Parry and the Project  
16 Coordinator will have access to the file. All information obtained in this study will be used for research  
17 purposes only. I will be able to access the results of the study from the PI when it is complete.  
18 I understand that if I participate in a discussion group, my anonymity will be preserved through the use  
19 of my first name only.  
20  
21

22 I understand that if I participate in a discussion group, my anonymity will be preserved through the use  
23 of my first name only.  
24  
25

26 I understand that I must respect the privacy and confidentiality of other study participants. The names  
27 of others involved in this study, and any personal information discussed during the group session are to  
28 be kept strictly confidential.  
29

30 The research study with which you are participating may be reviewed for quality assurance to ensure  
31 that required laws and guidelines are followed. If chosen, representatives of the Human Research  
32 Ethics Program (HREP), may access study related data and/or consent materials as part of their review.  
33 All information accessed by the HREP will be upheld to the same standard of confidentiality that has  
34 been stated by the research team.  
35  
36

### 37 **Right to Refuse or Withdraw**

38 I understand that my participation in this study is entirely voluntary and I am free to refuse to take part  
39 in the discussion group or to withdraw at any time prior to the discussion group without penalty.  
40 During the discussion group, I also understand that I can choose not to answer any given question  
41 without penalty. I understand if I withdraw from the study that my data will only be withdrawn if I  
42 explicitly request this to be done. I also understand that during and after the discussion groups, it will  
43 not be possible for me to withdraw my data from the study.  
44  
45

### 46 **Contact**

47 **I understand that if I have any questions about the study, I can contact Dr. Monica Parry at 416-  
48 946-3561 (Principal Investigator).** I understand that if I have questions about my rights as a research  
49 participant, I can contact the University of Toronto, Office of Research Ethics at  
50 ethics.review@utoronto.ca or 416-946-3273. I may keep this copy of the information and consent letter  
51 for my own reference.  
52  
53

### 54 **SUBJECT STATEMENT AND SIGNATURE SECTION**

55 I have read and understand the consent form for this study. I have had the purposes, procedures and  
56  
57

1  
2 technical language of this study explained to me. I have been given enough time to consider the above  
3 information and to seek advice if I chose to do so. I have had the opportunity to ask questions which  
4 have been answered to my satisfaction. I am voluntarily signing this form.  
5

6  
7 \_\_\_\_\_  
8 (Signature of participant)

\_\_\_\_\_ (Date)

9  
10 **STATEMENT OF INVESTIGATOR AND SIGNATURE SECTION**

11 I, or one of my colleagues, have carefully explained to the subject the nature of the above research  
12 study. I certify that, to the best of my knowledge, the subject understands clearly the nature of the study  
13 and demands, benefits, and risks involved to subjects in this study.  
14

15  
16 \_\_\_\_\_  
17 (Signature of study personnel)

\_\_\_\_\_ (Date)

18  
19  
20  
21  
22  
23  
24  
25  
26  
27  
28  
29  
30  
31  
32  
33  
34  
35  
36  
37  
38  
39  
40  
41  
42  
43  
44  
45  
46  
47  
48  
49  
50  
51  
52  
53  
54  
55  
56  
57

For peer review only

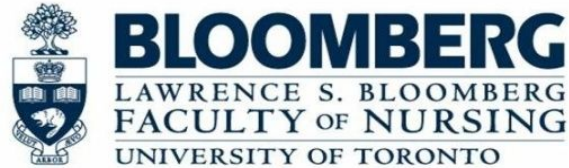

**Health Care Provider Information and Consent Form  
Study 1**

**Principal Investigator:**

**Dr. Monica Parry, Lawrence S. Bloomberg Faculty of Nursing, University of Toronto**

**Phone: (416) 946 – 3561**

**Email: [women.heartpain@utoronto.ca](mailto:women.heartpain@utoronto.ca)**

**Co-Investigators:**

Dr. Hance Clarke - University Health Network  
Dr. Ann Kristin Bjørnnes – Oslo Metropolitan University  
Dr. Joseph Cafazzo – University Health Network  
Ms. Abida Dhukai – University of Toronto  
Dr. Paula Harvey – Women’s College Hospital  
Dr. Joel Katz – York University  
Dr. Chitra Lalloo – Hospital for Sick Children  
Dr. Marit Leegaard – Oslo Metropolitan University  
Dr. France Légaré - Université Laval  
Dr. Judith McFetridge-Durdle – Florida State University  
Dr. Michael McGillion – McMaster University  
Dr. Colleen Norris – University of Alberta  
Ms. Rose Patterson – Anishnawbe Health Toronto  
Dr. Louise Pilote – Research Institute of the McGill University Health Centre  
Ms. Leah Pink – Sinai Health System  
Dr. Jennifer Price – Women’s College Hospital  
Dr. Jennifer Stinson – Hospital for Sick Children  
Mr. J. Charles Victor – University of Toronto  
Dr. Judy Watt-Watson – Lawrence S. Bloomberg Faculty of Nursing  
Ms. Carol Auld – Patient Advisor  
Ms. Lynn Cooper – Patient Advisor  
Ms. Christine Faubert – Patient Advisor  
Ms. Deborah Park – Patient Advisor  
Ms. Marianne Park – Patient Advisor  
Ms. Beatrice Rickard – Patient Advisor  
Ms. Vincenza Spiteri DeBonis – Patient Advisor

**Title of Project:** Development and Usability Testing of HEARTPAIN: An Integrated Smartphone and Web-Based Intervention for Women with Cardiac Pain

**Purpose and Background**

More women die of coronary artery disease (CAD) than cancer, chronic lower respiratory disease, Alzheimer’s disease, and accidents combined. Coronary artery disease is also the leading cause of



1  
2 death of women across all ages, and recent data show an increase in CAD incidence and deaths in  
3 women younger than 55 years of age. Women with CAD have cardiac pain that differs from that of  
4 men. The overall goal of this program of research is to develop and assess a HEARTPAIN app and  
5 website that will help women self-manage cardiac pain. Feedback from health care providers is a  
6 necessary step to designing HEARTPAIN.  
7

## 8 **Procedures**

9 If I agree to participate in this study, I understand that the following things will happen:

- 10 1. I will be asked to complete a baseline demographic form describing my age, education, and  
11 employment etc. To protect my privacy and confidentiality, I will have a study ID number instead of  
12 my name on the form.
- 13 2. I will participate in an interview session for approximately one hour, which may involve other health  
14 care providers who manage women who have cardiac pain. In this session I will be asked to describe  
15 the women I see with cardiac pain symptoms, and how I assess, manage and make decisions about their  
16 symptoms. The session will be audiotaped and to protect my privacy and anonymity, my last name will  
17 not be used.
- 18 3. I understand that I can volunteer to participate in the 2-day consensus conference.
- 19 4. I understand that I can volunteer to participate in future studies as HEARTPAIN is developed/tested.  
20  
21  
22  
23  
24  
25  
26  
27

## 28 **Potential Benefits**

29 I understand that by participating in this study I may have a better understanding of how others assess,  
30 manage and make decisions about cardiac pain in women. I may also become more aware of cardiac  
31 pain and cardiac pain symptoms in women.  
32  
33

34 I understand that by participating in this study that there may be no direct benefits. However, I may  
35 have a better understanding of how others assess, manage, and make decisions about cardiac pain in  
36 women. I may also become more aware of cardiac pain and cardiac pain symptoms in women.  
37  
38

39 I understand that I can get a plain language summary of the study results by checking the box  
40 below:  
41

- 42  I would like a copy of a plain language summary of the study results sent to me in an email link.  
43  
44

## 45 **Potential Risks**

46 I understand that there are no known risks to participating in this study. However, there may be  
47 unforeseeable risks. If I find that the focus group is difficult for me to attend, I can discuss this with the  
48 researchers who are conducting this study. I can have the option of a one-to-one telephone interview.  
49  
50

## 51 **Cost**

52 I understand that there is no charge for participating in this study.  
53  
54

## 55 **Financial Compensation**

56 I understand there is no financial compensation provided for participation in this study.  
57

### Confidentiality

I understand that information about specific individuals in this study will be kept strictly confidential and will not be available to anyone except the Principal Investigator (PI) and members of the investigative team. Only an identification number will appear on the demographic questionnaires, and therefore my responses will remain anonymous. One copy of my name and my study identification number will be kept in a locked drawer in the researcher's office. No one but Dr. Parry and the Project Coordinator will have access to the file. All information obtained in this study will be used for research purposes only. I will be able to access the results of the study from the PI when it is complete.

I understand that if I participate in a discussion group, my anonymity will be preserved through the use of my first name only.

I understand that I must respect the privacy and confidentiality of other study participants. The names of others involved in this study, and any personal information discussed during the group session are to be kept strictly confidential.

The research study with which you are participating may be reviewed for quality assurance to ensure that required laws and guidelines are followed. If chosen, representatives of the Human Research Ethics Program (HREP), may access study related data and/or consent materials as part of their review. All information accessed by the HREP will be upheld to the same standard of confidentiality that has been stated by the research team.

### Right to Refuse or Withdraw

I understand that my participation in this study is entirely voluntary and I am free to refuse to take part in the discussion group or to withdraw at any time prior to the discussion group without penalty. During the discussion group, I also understand that I can choose not to answer any given question without penalty. I understand if I withdraw from the study that my data will only be withdrawn if I explicitly request this to be done. I also understand that during and after the discussion groups, it will not be possible for me to withdraw my data from the study.

### Contact

**I understand that if I have any questions about the study, I can contact Dr. Monica Parry at 416-946-3561 (Principal Investigator).** I understand that if I have question about my rights as a research participant, I can contact the University of Toronto, Office of Research Ethics at [ethics.review@utoronto.ca](mailto:ethics.review@utoronto.ca) or 416-946-3273. I may keep this copy of the information and consent letter for my own reference.

### SUBJECT STATEMENT AND SIGNATURE SECTION

I have read and understand the consent form for this study. I have had the purposes, procedures and technical language of this study explained to me. I have been given enough time to consider the above information and to seek advice if I chose to do so. I have had the opportunity to ask questions which have been answered to my satisfaction. I am voluntarily signing this form.

\_\_\_\_\_  
(Signature of participant)

\_\_\_\_\_  
(Date)

### STATEMENT OF INVESTIGATOR AND SIGNATURE SECTION

1  
2  
3  
4  
5  
6  
7  
8  
9  
10  
11  
12  
13  
14  
15  
16  
17  
18  
19  
20  
21  
22  
23  
24  
25  
26  
27  
28  
29  
30  
31  
32  
33  
34  
35  
36  
37  
38  
39  
40  
41  
42  
43  
44  
45  
46  
47  
48  
49  
50  
51  
52  
53  
54  
55  
56  
57  
58  
59  
60

I, or one of my colleagues, have carefully explained to the subject the nature of the above research study. I certify that, to the best of my knowledge, the subject understands clearly the nature of the study and demands, benefits, and risks involved to subjects in this study.

\_\_\_\_\_  
(Signature of study personnel)

\_\_\_\_\_  
(Date)

For peer review only

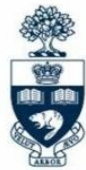

**BLOOMBERG**  
LAWRENCE S. BLOOMBERG  
FACULTY OF NURSING  
UNIVERSITY OF TORONTO

**Participant Information and Consent Form  
Study 2**

---

**Principal Investigator:**  
**Dr. Monica Parry, Lawrence S. Bloomberg Faculty of Nursing, University of Toronto**  
**Phone: (416) 946 – 3561**  
**Email: women.heartpain@utoronto.ca**

---

**Co-Investigators:**

Dr. Hance Clarke - University Health Network  
Dr. Ann Kristin Bjørnnes – Oslo Metropolitan University  
Dr. Joseph Cafazzo – University Health Network  
Ms. Abida Dhukai – University of Toronto  
Dr. Paula Harvey – Women’s College Hospital  
Dr. Joel Katz – York University  
Dr. Chitra Lalloo – Hospital for Sick Children  
Dr. Marit Leegaard – Oslo Metropolitan University  
Dr. France Légaré - Université Laval  
Dr. Judith McFetridge-Durdle – Florida State University  
Dr. Michael McGillion – McMaster University  
Dr. Colleen Norris – University of Alberta  
Ms. Rose Patterson – Anishnawbe Health Toronto  
Dr. Louise Pilote – Research Institute of the McGill University Health Centre  
Ms. Leah Pink – Sinai Health System  
Dr. Jennifer Price – Women’s College Hospital  
Dr. Jennifer Stinson – Hospital for Sick Children  
Mr. J. Charles Victor – University of Toronto  
Dr. Judy Watt-Watson – Lawrence S. Bloomberg Faculty of Nursing  
Ms. Carol Auld – Patient Advisor  
Ms. Lynn Cooper – Patient Advisor  
Ms. Christine Faubert – Patient Advisor  
Ms. Deborah Park – Patient Advisor  
Ms. Marianne Park – Patient Advisor  
Ms. Beatrice Rickard – Patient Advisor  
Ms. Vincenza Spiteri DeBonis – Patient Advisor

**Title of Project:** Development and Usability Testing of HEARTPAIN: An Integrated Smartphone and Web-Based Intervention for Women with Cardiac Pain

**Purpose and Background**

More women die of coronary artery disease (CAD) than cancer, chronic lower respiratory disease, Alzheimer’s disease, and accidents combined. Coronary artery disease is also the leading cause of

1  
2 death of women across all ages, and recent data show an increase in CAD incidence and deaths in  
3 women younger than 55 years of age. Women with CAD have cardiac pain that differs from that of  
4 men. The overall goal of this program of research is to develop and assess a HEARTPAIN app and  
5 website that will help women self-manage cardiac pain. Feedback from women is a necessary step to  
6 designing HEARTPAIN.  
7

## 8 **Procedures**

9 If I agree to participate in this study, I understand that the following things will happen:

10  
11  
12 1. I will be asked to complete a baseline demographic form describing my age, education, employment,  
13 type and duration of cardiac pain etc. To protect my privacy and confidentiality, I will have a study ID  
14 number instead of my name on the form.  
15

16  
17 2. I will be asked to use the HEARTPAIN app and website as I work through cardiac pain scenarios  
18 and describe my experiences with HEARTPAIN. I will be observed during the session that will last for  
19 1-1.5 hours and take place in a quiet room at the Centre for Global eHealth Innovation. At the end of  
20 the session I will be asked four short questions and asked to complete a short questionnaire. The  
21 session will be video and audio-recorded and to protect my privacy and anonymity, my last name will  
22 not be used. All video/audio and transcribed files will be kept on the secure server at Bloomberg  
23 Nursing and only the PI (Parry) and Project Coordinator (Leyden) will have access to the password-  
24 protected server. Study data will be kept for seven years and then destroyed.  
25

26  
27 3. I understand that I can volunteer to participate in future studies as HEARTPAIN is developed/tested.  
28

## 29 **Potential Benefits**

30 Although there is no guarantee of direct benefits, I do understand that by participating in this study that  
31 I may have a better understanding of my cardiac pain.  
32  
33

34 I understand that I can get a plain language summary of the study results by checking the box below:

- 35  
36  I would like a copy of a plain language summary of the study results sent to me in an email link.  
37  
38

## 39 **Potential Risks**

40 I understand that there are no known risks to participating in this study. However, there may be  
41 unforeseeable risks. If I find that a cardiac pain scenario upsets me, I can discuss this with the  
42 researchers who are conducting this study. A mutually agreeable alternative scenario will be given to  
43 me.  
44

45  
46 If you experience medical distress during a scenario session, we ask that you let the facilitator know  
47 about your distress and medical attention will be sought.  
48

## 49 **Cost**

50 I understand that there is no charge for participating in this study. I may incur transportation, parking  
51 and/or out-of-pocket costs and these will be reimbursed as outlined in the financial compensation  
52 section.  
53

## 54 **Financial Compensation**

1  
2 I understand that my transportation and out-of-pocket expenses will be reimbursed, in accordance with  
3 University of Toronto's reimbursement to participant guidelines. Out-of-pocket expenses include, but  
4 are not limited to: ground transportation to/from session, accommodation if necessary, meals as  
5 required. [Participant guidelines for study reimbursements: [http://www.research.utoronto.ca/policies-  
6 and-procedures/compensation-and-reimbursement-of-research-participants/](http://www.research.utoronto.ca/policies-and-procedures/compensation-and-reimbursement-of-research-participants/)]. Original receipts and/or  
7 paid invoices will be required before payment is provided.  
8  
9

10 If the study results in the commercialization of this intervention, I understand that I will not be entitled  
11 to any financial benefits resulting from it.  
12

### 13 **Confidentiality**

14 I understand that information about specific individuals in this study will be kept strictly confidential  
15 and will not be available to anyone except the Principal Investigator (PI) and members of the  
16 investigative team. Only an identification number will appear on the demographic questionnaires, and  
17 therefore my responses will remain anonymous. One copy of my name and my study identification  
18 number will be kept in a locked drawer in the researcher's office. No one but Dr. Parry and the Project  
19 Coordinator will have access to the file. All information obtained in this study will be used for research  
20 purposes only. I will be able to access the results of the study from the PI when it is complete.  
21  
22

23  
24 The research study with which you are participating may be reviewed for quality assurance to ensure  
25 that required laws and guidelines are followed. If chosen, representatives of the Human Research  
26 Ethics Program (HREP), may access study related data and/or consent materials as part of their review.  
27 All information accessed by the HREP will be upheld to the same standard of confidentiality that has  
28 been stated by the research team.  
29

### 30 **Right to Refuse or Withdraw**

31 I understand that my participation in this study is entirely voluntary and I am free to refuse to take part  
32 in the usability testing or to withdraw at any time prior to the usability testing without penalty. During  
33 the usability testing, I also understand that I can choose not to answer any given question without  
34 penalty. I understand if I withdraw from the study that my data will only be withdrawn if I explicitly  
35 request this to be done. I also understand that during and after the usability testing, it will not be  
36 possible for me to withdraw my data from the study.  
37  
38

### 39 **Contact**

40 I understand that if I have any questions about the study, I can contact Dr. Monica Parry at 416-  
41 946-3561 (Principal Investigator). I understand that if I have question about my rights as a research  
42 participant, I can contact the University of Toronto, Office of Research Ethics at  
43 ethics.review@utoronto.ca or 416-946-3273. I may keep this copy of the information and consent letter  
44 for my own reference.  
45  
46

### 47 **SUBJECT STATEMENT AND SIGNATURE SECTION**

48 I have read and understand the consent form for this study. I have had the purposes, procedures and  
49 technical language of this study explained to me. I have been given enough time to consider the above  
50 information and to seek advice if I chose to do so. I have had the opportunity to ask questions which  
51 have been answered to my satisfaction. I am voluntarily signing this form.  
52  
53

54  
55  
56 \_\_\_\_\_  
(Signature of participant)

56 \_\_\_\_\_  
(Date)

1  
2  
3  
4  
5  
6  
7  
8  
9  
10  
11  
12  
13  
14  
15  
16  
17  
18  
19  
20  
21  
22  
23  
24  
25  
26  
27  
28  
29  
30  
31  
32  
33  
34  
35  
36  
37  
38  
39  
40  
41  
42  
43  
44  
45  
46  
47  
48  
49  
50  
51  
52  
53  
54  
55  
56  
57  
58  
59  
60

**STATEMENT OF INVESTIGATOR AND SIGNATURE SECTION**

I, or one of my colleagues, have carefully explained to the subject the nature of the above research study. I certify that, to the best of my knowledge, the subject understands clearly the nature of the study and demands, benefits, and risks involved to subjects in this study.

\_\_\_\_\_  
(Signature of study personnel)

\_\_\_\_\_  
(Date)

For peer review only

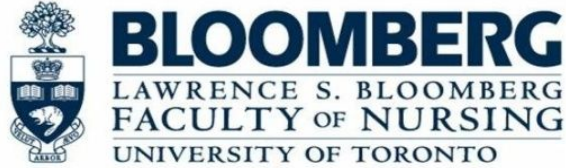

**Participant Information and Consent Form**  
**Study 3**

---

**Principal Investigator:**

**Dr. Monica Parry, Lawrence S. Bloomberg Faculty of Nursing, University of Toronto**

**Phone: (416) 946 – 3561**

**Email: [women.heartpain@utoronto.ca](mailto:women.heartpain@utoronto.ca)**

---

**Co-Investigators:**

Dr. Hance Clarke - University Health Network  
Dr. Ann Kristin Bjørnnes – Oslo Metropolitan University  
Dr. Joseph Cafazzo – University Health Network  
Ms. Abida Dhukai – University of Toronto  
Dr. Paula Harvey – Women’s College Hospital  
Dr. Joel Katz – York University  
Dr. Chitra Laloo – Hospital for Sick Children  
Dr. Marit Leegaard – Oslo Metropolitan University  
Dr. France Légaré - Université Laval  
Dr. Judith McFetridge-Durdle – Florida State University  
Dr. Michael McGillion – McMaster University  
Dr. Colleen Norris – University of Alberta  
Ms. Rose Patterson – Anishnawbe Health Toronto  
Dr. Louise Pilote – Research Institute of the McGill University Health Centre  
Ms. Leah Pink – Sinai Health System  
Dr. Jennifer Price – Women’s College Hospital  
Dr. Jennifer Stinson – Hospital for Sick Children  
Mr. J. Charles Victor – University of Toronto  
Dr. Judy Watt-Watson – Lawrence S. Bloomberg Faculty of Nursing  
Ms. Carol Auld – Patient Advisor  
Ms. Lynn Cooper – Patient Advisor  
Ms. Christine Faubert – Patient Advisor  
Ms. Deborah Park – Patient Advisor  
Ms. Marianne Park – Patient Advisor  
Ms. Beatrice Rickard – Patient Advisor  
Ms. Vincenza Spiteri DeBonis – Patient Advisor

**Title of Project:** Development and Usability Testing of HEARTPAIN: An Integrated Smartphone and Web-Based Intervention for Women with Cardiac Pain

**Purpose and Background**

More women die of coronary artery disease (CAD) than cancer, chronic lower respiratory disease, Alzheimer’s disease, and accidents combined. Coronary artery disease is also the leading cause of



1  
2 death of women across all ages, and recent data show an increase in CAD incidence and deaths in  
3 women younger than 55 years of age. Women with CAD have cardiac pain that differs from that of  
4 men. The overall goal of this program of research is to develop and assess a HEARTPAIN app and  
5 website that will help women self-manage cardiac pain. Feedback from women is a necessary step to  
6 designing HEARTPAIN.  
7

## 8 **Procedures**

9 If I agree to participate in this study, I understand that the following things will happen:

10  
11  
12 1. I will be asked to attend one in-person session to learn about the study, provide consent, and  
13 complete a baseline demographic form describing my age, education, employment, type and duration  
14 of cardiac pain etc. To protect my privacy and confidentiality, I will have a study ID number instead of  
15 my name on the form.  
16

17  
18 2. I will be asked to complete two questionnaires that relate to my pain and health-related quality of  
19 life. In addition, I will be asked to fill out these same questionnaires at the end of the 3-month study. To  
20 protect my privacy and confidentiality, I will have a study ID number instead of my name on the  
21 questionnaires.  
22

23  
24 3. I understand that there will be two groups of participants in this study: HEARTPAIN group and a  
25 control group. I will be randomly assigned (e.g., like flipping a coin) to one of these two groups. I  
26 understand that if I am assigned to the control group, I will receive the usual care and supports given to  
27 women with cardiac pain, including usual clinic appointments and follow-up. If I am assigned to the  
28 HEARTPAIN group, I will also receive the usual care and supports given to women with cardiac pain,  
29 including usual clinic appointments and follow-up. In addition, I will log-in to the pain diary app daily  
30 for 3 months to complete pain diary entries and develop and track my goals. I can also use the  
31 HEARTPAIN website to learn more about cardiac pain.  
32

33  
34 4. To ensure privacy, all my personal information (e.g., name, address, phone number) will be stored  
35 separately from the health data (e.g., risk factors, pain descriptors) that I enter on the HEARTPAIN  
36 app/website. Information that is entered in the smartphone app/website or used by the reporting system  
37 will be separate from my personal information (e.g., name, address, phone number). No personal  
38 information (e.g., name, address, phone number) will be transmitted. For security issues, I will access  
39 the app/website using a study number and all health information that is transmitted will be sent securely  
40 through an encrypted HTTPS connection that prevents interception by a third party.  
41  
42

43  
44 5. I understand that my attendance in the HEARTPAIN study is not meant to replace my regular  
45 ongoing health care. I should not change any aspect of my regular treatment without first talking to my  
46 doctor.  
47

48 6. I understand that I can volunteer to participate in future studies as HEARTPAIN is developed/tested.  
49

## 50 **Potential Benefits**

51 I understand that by participating in this study I may have a better understanding of my cardiac pain.

52  
53 I understand that I can get a plain language summary of the study results by checking the box below:

54  
55  
56  I would like a copy of a plain language summary of the study results sent to me in an email link.  
57

### Potential Risks

I understand that there are no known risks to participating in this study. However, there may be unforeseeable risks. If I find that it is difficult for me to attend the in-person session, I can discuss this with the researchers who are conducting this study.

If you experience medical distress during the three-month app trial phase, please contact your local family doctor. If your medical distress is urgent, please call 911.

### Cost

I understand that there is no charge for participating in this study. I may incur transportation, parking and/or out-of-pocket costs and these will be reimbursed as outlined in the financial compensation section.

### Financial Compensation

I understand that if I need to travel to attend the in-person session my transportation costs will be reimbursed, in accordance with University of Toronto's reimbursement to participant guidelines. I also understand that a gift card will be provided at study completion (\$25). [Participant guidelines for study reimbursements: <http://www.research.utoronto.ca/policies-and-procedures/compensation-and-reimbursement-of-research-participants/>]. Original receipts and/or paid invoices will be required before payment is provided. If I am assigned to the HEARTPAIN group I will log-in to the pain diary app daily for 3 months to complete pain diary entries and develop and track my goals. This will be done using a Smartphone. If I need a Smartphone to participate in the study, one will be provided for the duration of the study. The study will also pay for data on the phone (\$85 each month). If the Smartphone gets lost/stolen/broken during the 3-month study, it will be replaced at no charge.

If the study results in the commercialization of this intervention, I understand that I will not be entitled to any financial benefits resulting from it.

### Confidentiality

I understand that information about specific individuals in this study will be kept strictly confidential and will not be available to anyone except the Principal Investigator (PI) and members of the investigative team. Only an identification number will appear on the demographic questionnaires, and therefore my responses will remain anonymous. One copy of my name and my study identification number will be kept in a locked drawer in the researcher's office. No one but Dr. Parry and the Project Coordinator will have access to the file. All information obtained in this study will be used for research purposes only. I will be able to access the results of the study from the PI when it is complete.

The research study with which you are participating may be reviewed for quality assurance to ensure that required laws and guidelines are followed. If chosen, representatives of the Human Research Ethics Program (HREP), may access study related data and/or consent materials as part of their review. All information accessed by the HREP will be upheld to the same standard of confidentiality that has been stated by the research team.

### Right to Refuse or Withdraw

I understand that my participation in this study is entirely voluntary and I am free to withdraw at any time without penalty. I also understand that I can choose not to answer any given question without penalty. I understand if I withdraw from the study that my data will only be withdrawn if I explicitly

1  
2 request this to be done. I also understand that after I receive my group assignment, it will not be  
3 possible for me to withdraw my data from the study.  
4

5 **Contact**

6 **I understand that if I have any questions about the study, I can contact Dr. Monica Parry at 416-**  
7 **946-3561 (Principal Investigator).** I understand that if I have question about my rights as a research  
8 participant, I can contact the University of Toronto, Office of Research Ethics at  
9 ethics.review@utoronto.ca or 416-946-3273. I may keep this copy of the information and consent letter  
10 for my own reference.  
11  
12  
13  
14  
15  
16  
17  
18  
19  
20  
21  
22  
23  
24  
25  
26  
27  
28  
29  
30  
31  
32  
33  
34  
35  
36  
37  
38  
39  
40  
41  
42  
43  
44  
45  
46  
47  
48  
49  
50  
51  
52  
53  
54  
55  
56  
57

For peer review only

**SUBJECT STATEMENT AND SIGNATURE SECTION**

I have read and understand the consent form for this study. I have had the purposes, procedures and technical language of this study explained to me. I have been given enough time to consider the above information and to seek advice if I chose to do so. I have had the opportunity to ask questions which have been answered to my satisfaction. I am voluntarily signing this form.

---

(Signature of participant)

---

(Date)

**STATEMENT OF INVESTIGATOR AND SIGNATURE SECTION**

I, or one of my colleagues, have carefully explained to the subject the nature of the above research study. I certify that, to the best of my knowledge, the subject understands clearly the nature of the study and demands, benefits, and risks involved to subjects in this study.

---

(Signature of study personnel)

---

(Date)

DC0190GP

**Canadian Institutes of Health Research / Instituts de recherche en santé du Canada****Notice of Decision / Avis de décision**

Application Number/Numéro de la demande: 389044

Committee Code/Code du comité: KTR

Applicants/Candidats: Dr. Monica J.E. Parry

Dr. Hance Alex Clarke

With/Avec: Dr. A. Bjoernnes

Dr. J. Cafazzo

Ms. L. Cooper

Ms. A. Dhukai

Dr. P. Harvey

Dr. J. Katz

Dr. C. Lalloo

Mrs. M. Leegaard

Docteur F. Légaré

Dr. J. Mcfetridge-Durdle

Dr. M. Mcgillion

Dr. C. Norris

Ms. R. Patterson

Dr. L. Pilote

Ms. L. Pink

Dr. J. Price

Dr. J. Stinson

Mr. J. Victor

Dr. J. Watt-Watson

Institution paid/  
Établissement payé: University of Toronto

Title/Titre: Development and Usability Testing of HEARTPAIN: An Integrated Smartphone and Web-Based Intervention for Women with Cardiac Pain

Primary Inst./  
Inst. principal: Gender and Health / Santé des femmes et des hommesOther Related Inst./  
Autres inst. connexes: Circulatory and Respiratory Health / Santé circulatoire et respiratoire**Competition Outcome/Résultats du concours:** Project Grant / Subvention Projet

September/Septembre 15, 2017

**Number in competition/Nbre de demandes dans le concours:** 3415**Number approved/Nbre de demandes approuvées:** 512**Decision on your application/  
Décision sur votre demande:** Approved / Approuvée**Total Funding Amount:/  
Montant total du financement:** \$566,099**Term/Durée:** 3 yrs/ans 0 months/mois**Peer Review Committee Recommendation, for your information and use/  
Recommandation du comité d'examen par les pairs, pour fins d'information et d'utilisation:****Committee/Comité:** Knowledge Translation Research / Recherche sur l'application des connaissances**Number reviewed/  
Nbre de demandes examinées:** 50**Number approved in that committee/  
Nbre de demandes approuvées dans ce comité:** 7**Application rank within the committee/  
Rang de la demande dans ce comité:** 5**Percent Rank Within the Committee/  
Rang en pourcentage au sein du comité:** 91.84%**Rating/  
Cote:** 4.38

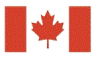

160 Elgin Street, 9th Floor  
Address Locator 4809A  
Ottawa, Ontario K1A 0W9

160, rue Elgin, 9<sup>e</sup> étage  
Indice de l'adresse 4809A  
Ottawa (Ontario) K1A 0W9

January 22, 2018

Dr. Monica J.E. Parry  
Lawrence S. Bloomberg Faculty of Nursing  
University of Toronto  
155 College Street, Suite 130  
Toronto, Ontario M5T 1P8

Dear Dr. Parry,

On behalf of the Canadian Institutes of Health Research (CIHR), I am pleased to inform you that your application entitled "Development and Usability Testing of HEARTPAIN: An Integrated Smartphone and Web-Based Intervention for Women with Cardiac Pain", submitted to the Project Grant – Fall 2017 competition, has been approved for funding.

Your application reviews and competition results can be accessed through ResearchNet. If you are unable to view these documents, please contact us at support@cihr-irsc.gc.ca. Your Authorization for Funding will follow in the mail.

As CIHR does not notify co-applicants of the decision, we ask that you inform those individuals involved, along with their research institutions (if different from your own) of the outcome of this application.

Should you have any questions, please do not hesitate to communicate with a Processing Officer in the Contact Centre at 613-954-1968 or by e-mail: support@cihr-irsc.gc.ca.

Congratulations on your success in this competition.

Sincerely,

Martine Lafrance, Ph.D.  
Manager, Project Grant Program  
Program Design and Delivery Branch

466593-201709PJT-KTR-389044-102113-DLPJT

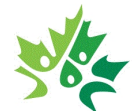

CIHR IRSC

Discoveries for life / Découvertes pour la vie

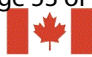

160 Elgin Street, 9th Floor  
Address Locator 4809A  
Ottawa, Ontario K1A 0W9

160, rue Elgin, 9<sup>e</sup> étage  
Indice de l'adresse 4809A  
Ottawa (Ontario) K1A 0W9

January 22, 2018

Dr. Monica J.E. Parry  
Lawrence S. Bloomberg Faculty of Nursing  
University of Toronto  
155 College Street, Suite 130  
Toronto, Ontario M5T 1P8

Dear Dr. Parry,

Congratulations on your success in the recent Canadian Institutes of Health Research (CIHR) Project Grant - Fall 2017 competition.

Your application was reviewed by your peers and considered to be of exceptionally high quality. You should take great pride in this achievement, particularly given the highly competitive nature of CIHR funding. As you know, peer review is the cornerstone of our research funding system. This process is made possible because of the volunteerism of individuals who generously gave their time to review your application. We are continuously recruiting and retaining the most accomplished innovative and creative scientists to review health research proposals. As a CIHR-funded researcher, you are encouraged to participate should you be invited to serve in the peer review process for future competitions.

To highlight your achievements and to communicate the value of health research to Canadians, we encourage you to work with your institution to promote your research. To support you in this activity, CIHR has developed guidelines on public communication available at: [www.cihr-irsc.gc.ca/e/30789.html](http://www.cihr-irsc.gc.ca/e/30789.html).

Once again, I offer you my congratulations and best wishes for success in your research.

Yours sincerely,

Roderick R. McInnes, CM, OOnt, MD, PhD  
Acting President

466667-201709PJT-KTR-389044-102113-CLPJT

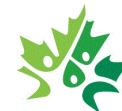

CIHR IRSC

Discoveries for life / Découvertes pour la vie

# SPIRIT and SPIRIT-PRO reporting checklist for protocol of a clinical trial.

|                                                         | Reporting Item                                                                                                                                                                                                                                                                                               | Page Number |
|---------------------------------------------------------|--------------------------------------------------------------------------------------------------------------------------------------------------------------------------------------------------------------------------------------------------------------------------------------------------------------|-------------|
| <b>Administrative information</b>                       |                                                                                                                                                                                                                                                                                                              |             |
| Title                                                   | <a href="#">#1</a> Descriptive title identifying the study design, population, interventions, and, if applicable, trial acronym                                                                                                                                                                              | 1           |
| Trial registration                                      | <a href="#">#2a</a> Trial identifier and registry name. If not yet registered, name of intended registry                                                                                                                                                                                                     | 4           |
| Trial registration: data set                            | <a href="#">#2b</a> All items from the World Health Organization Trial Registration Data Set                                                                                                                                                                                                                 | 11          |
| Protocol version                                        | <a href="#">#3</a> Date and version identifier                                                                                                                                                                                                                                                               | 2           |
| Funding                                                 | <a href="#">#4</a> Sources and types of financial, material, and other support                                                                                                                                                                                                                               | 18          |
| Roles and responsibilities: contributorship             | <a href="#">#5a</a> Names, affiliations, and roles of protocol contributors. <b>SPIRIT-PRO Elaboration/Extension:</b> Specify individual(s) responsible for the PRO content of the trial protocol                                                                                                            | 18          |
| Roles and responsibilities: sponsor contact information | <a href="#">#5b</a> Name and contact information for the trial sponsor                                                                                                                                                                                                                                       | 1, 17       |
| Roles and responsibilities: sponsor and funder          | <a href="#">#5c</a> Role of study sponsor and funders, if any, in study design; collection, management, analysis, and interpretation of data; writing of the report; and the decision to submit the report for publication, including whether they will have ultimate authority over any of these activities | 18          |
| Roles and responsibilities: committees                  | <a href="#">#5d</a> Composition, roles, and responsibilities of the coordinating centre, steering committee, endpoint adjudication committee, data management team, and other individuals or groups overseeing the trial, if applicable (see Item 21a for data monitoring committee)                         | 15, 18      |



## 1 Introduction

|    |                           |                      |                                                                    |
|----|---------------------------|----------------------|--------------------------------------------------------------------|
| 2  |                           |                      |                                                                    |
| 3  | Background and            | <a href="#">#6a</a>  | Description of research question and justification for undertaking |
| 4  | rationale                 |                      | the trial, including summary of relevant studies (published and    |
| 5  |                           |                      | unpublished) examining benefits and harms for each intervention.   |
| 6  |                           |                      | <b>SPIRIT-PRO Elaboration/Extension:</b> Describe the PRO-specific |
| 7  |                           |                      | research question and rationale for PRO assessment and             |
| 8  |                           |                      | summarize PRO findings in relevant studies                         |
| 9  |                           |                      |                                                                    |
| 10 |                           |                      |                                                                    |
| 11 |                           |                      |                                                                    |
| 12 |                           |                      |                                                                    |
| 13 | Background and            | <a href="#">#6b</a>  | Explanation for choice of comparators                              |
| 14 | rationale: choice of      |                      |                                                                    |
| 15 | comparators               |                      |                                                                    |
| 16 |                           |                      |                                                                    |
| 17 |                           |                      |                                                                    |
| 18 | Objectives                | <a href="#">#7</a>   | Specific objectives or hypotheses. <b>SPIRIT-PRO</b>               |
| 19 |                           |                      | <b>Elaboration/Extension:</b> State specific PRO objectives or     |
| 20 |                           |                      | hypotheses (including relevant PRO concepts/domains)               |
| 21 |                           |                      |                                                                    |
| 22 |                           |                      |                                                                    |
| 23 |                           |                      |                                                                    |
| 24 | Trial design              | <a href="#">#8</a>   | Description of trial design including type of trial (eg, parallel  |
| 25 |                           |                      | group, crossover, factorial, single group), allocation ratio, and  |
| 26 |                           |                      | framework (eg, superiority, equivalence, non-inferiority,          |
| 27 |                           |                      | exploratory)                                                       |
| 28 |                           |                      |                                                                    |
| 29 |                           |                      |                                                                    |
| 30 |                           |                      |                                                                    |
| 31 | <b>Methods:</b>           |                      |                                                                    |
| 32 | <b>Participants,</b>      |                      |                                                                    |
| 33 | <b>interventions, and</b> |                      |                                                                    |
| 34 | <b>outcomes</b>           |                      |                                                                    |
| 35 |                           |                      |                                                                    |
| 36 |                           |                      |                                                                    |
| 37 | Study setting             | <a href="#">#9</a>   | Description of study settings (eg, community clinic, academic      |
| 38 |                           |                      | hospital) and list of countries where data will be collected.      |
| 39 |                           |                      | Reference to where list of study sites can be obtained             |
| 40 |                           |                      |                                                                    |
| 41 |                           |                      |                                                                    |
| 42 |                           |                      |                                                                    |
| 43 | Eligibility criteria      | <a href="#">#10</a>  | Inclusion and exclusion criteria for participants. If applicable,  |
| 44 |                           |                      | eligibility criteria for study centres and individuals who will    |
| 45 |                           |                      | perform the interventions (eg, surgeons, psychotherapists).        |
| 46 |                           |                      | <b>SPIRIT-PRO Elaboration/Extension:</b> Specify any PRO-specific  |
| 47 |                           |                      | eligibility criteria (e.g., language/reading requirements or       |
| 48 |                           |                      | prerandomization completion of PRO). If PROs will not be           |
| 49 |                           |                      | collected from the entire study sample, provide a rationale and    |
| 50 |                           |                      | describe the method for obtaining the PRO subsample                |
| 51 |                           |                      |                                                                    |
| 52 |                           |                      |                                                                    |
| 53 |                           |                      |                                                                    |
| 54 |                           |                      |                                                                    |
| 55 | Interventions:            | <a href="#">#11a</a> | Interventions for each group with sufficient detail to allow       |
| 56 | description               |                      | replication, including how and when they will be administered      |
| 57 |                           |                      |                                                                    |
| 58 |                           |                      |                                                                    |
| 59 |                           |                      |                                                                    |
| 60 |                           |                      |                                                                    |

|    |                      |                      |                                                                          |          |
|----|----------------------|----------------------|--------------------------------------------------------------------------|----------|
| 1  | Interventions:       | <a href="#">#11b</a> | Criteria for discontinuing or modifying allocated interventions for      | 13, 14   |
| 2  | modifications        |                      | a given trial participant (eg, drug dose change in response to           |          |
| 3  |                      |                      | harms, participant request, or improving / worsening disease)            |          |
| 4  |                      |                      |                                                                          |          |
| 5  |                      |                      |                                                                          |          |
| 6  | Interventions:       | <a href="#">#11c</a> | Strategies to improve adherence to intervention protocols, and any       | 14       |
| 7  | adherence            |                      | procedures for monitoring adherence (eg, drug tablet return;             |          |
| 8  |                      |                      | laboratory tests)                                                        |          |
| 9  |                      |                      |                                                                          |          |
| 10 |                      |                      |                                                                          |          |
| 11 | Interventions:       | <a href="#">#11d</a> | Relevant concomitant care and interventions that are permitted or        | 13       |
| 12 | concomitant care     |                      | prohibited during the trial                                              |          |
| 13 |                      |                      |                                                                          |          |
| 14 |                      |                      |                                                                          |          |
| 15 | Outcomes             | <a href="#">#12</a>  | Primary, secondary, and other outcomes, including the specific           | 13, 14   |
| 16 |                      |                      | measurement variable (eg, systolic blood pressure), analysis metric      |          |
| 17 |                      |                      | (eg, change from baseline, final value, time to event), method of        |          |
| 18 |                      |                      | aggregation (eg, median, proportion), and time point for each            |          |
| 19 |                      |                      | outcome. Explanation of the clinical relevance of chosen efficacy        |          |
| 20 |                      |                      | and harm outcomes is strongly recommended. <b>SPIRIT-PRO</b>             |          |
| 21 |                      |                      | <b>Elaboration/Extension:</b> Specify the PRO concepts/domains used      |          |
| 22 |                      |                      | to evaluate the intervention (e.g., overall health-related quality of    |          |
| 23 |                      |                      | life, specific domain, specific symptom) and, for each one, the          |          |
| 24 |                      |                      | analysis metric (e.g., change from baseline, final value, time to        |          |
| 25 |                      |                      | event) and the principal time point or period of interest                |          |
| 26 |                      |                      |                                                                          |          |
| 27 |                      |                      |                                                                          |          |
| 28 |                      |                      |                                                                          |          |
| 29 |                      |                      |                                                                          |          |
| 30 |                      |                      |                                                                          |          |
| 31 |                      |                      |                                                                          |          |
| 32 |                      |                      |                                                                          |          |
| 33 | Participant timeline | <a href="#">#13</a>  | Time schedule of enrolment, interventions (including any run-ins         | 13, 14   |
| 34 |                      |                      | and washouts), assessments, and visits for participants. A               |          |
| 35 |                      |                      | schematic diagram is highly recommended. <b>SPIRIT-PRO</b>               | Figure 1 |
| 36 |                      |                      | <b>Elaboration/Extension:</b> Include a schedule of PRO assessments,     |          |
| 37 |                      |                      | providing a rationale for the time points, and justifying if the initial |          |
| 38 |                      |                      | assessment is not prerandomization. Specify time windows,                |          |
| 39 |                      |                      | whether PRO collection is prior to clinical assessments, and, if         |          |
| 40 |                      |                      | using multiple questionnaires, whether order of administration will      |          |
| 41 |                      |                      | be standardized                                                          |          |
| 42 |                      |                      |                                                                          |          |
| 43 |                      |                      |                                                                          |          |
| 44 |                      |                      |                                                                          |          |
| 45 |                      |                      |                                                                          |          |
| 46 |                      |                      |                                                                          |          |
| 47 | Sample size          | <a href="#">#14</a>  | Estimated number of participants needed to achieve study                 | 14       |
| 48 |                      |                      | objectives and how it was determined, including clinical and             |          |
| 49 |                      |                      | statistical assumptions supporting any sample size calculations.         |          |
| 50 |                      |                      | <b>SPIRIT-PRO Elaboration/Extension:</b> When a PRO is the               |          |
| 51 |                      |                      | primary endpoint, state the required sample size (and how it was         |          |
| 52 |                      |                      | determined) and recruitment target (accounting for expected loss to      |          |
| 53 |                      |                      | follow-up). If sample is not established based on the PRO                |          |
| 54 |                      |                      | endpoint, then discuss the power of the principal PRO analyses           |          |
| 55 |                      |                      |                                                                          |          |
| 56 |                      |                      |                                                                          |          |
| 57 |                      |                      |                                                                          |          |
| 58 |                      |                      |                                                                          |          |
| 59 |                      |                      |                                                                          |          |
| 60 |                      |                      |                                                                          |          |

|    |                           |                      |                                                                                                                                                                                                                                                                                                                                                                                                               |        |
|----|---------------------------|----------------------|---------------------------------------------------------------------------------------------------------------------------------------------------------------------------------------------------------------------------------------------------------------------------------------------------------------------------------------------------------------------------------------------------------------|--------|
| 1  | Recruitment               | <a href="#">#15</a>  | Strategies for achieving adequate participant enrolment to reach target sample size                                                                                                                                                                                                                                                                                                                           | 9, 11  |
| 2  |                           |                      |                                                                                                                                                                                                                                                                                                                                                                                                               |        |
| 3  |                           |                      |                                                                                                                                                                                                                                                                                                                                                                                                               |        |
| 4  |                           |                      |                                                                                                                                                                                                                                                                                                                                                                                                               |        |
| 5  | <b>Methods:</b>           |                      |                                                                                                                                                                                                                                                                                                                                                                                                               |        |
| 6  | <b>Assignment of</b>      |                      |                                                                                                                                                                                                                                                                                                                                                                                                               |        |
| 7  | <b>interventions (for</b> |                      |                                                                                                                                                                                                                                                                                                                                                                                                               |        |
| 8  | <b>controlled trials)</b> |                      |                                                                                                                                                                                                                                                                                                                                                                                                               |        |
| 9  |                           |                      |                                                                                                                                                                                                                                                                                                                                                                                                               |        |
| 10 |                           |                      |                                                                                                                                                                                                                                                                                                                                                                                                               |        |
| 11 | Allocation: sequence      | <a href="#">#16a</a> | Method of generating the allocation sequence (eg, computer-generated random numbers), and list of any factors for stratification. To reduce predictability of a random sequence, details of any planned restriction (eg, blocking) should be provided in a separate document that is unavailable to those who enrol participants or assign interventions                                                      | 12, 13 |
| 12 | generation                |                      |                                                                                                                                                                                                                                                                                                                                                                                                               |        |
| 13 |                           |                      |                                                                                                                                                                                                                                                                                                                                                                                                               |        |
| 14 |                           |                      |                                                                                                                                                                                                                                                                                                                                                                                                               |        |
| 15 |                           |                      |                                                                                                                                                                                                                                                                                                                                                                                                               |        |
| 16 |                           |                      |                                                                                                                                                                                                                                                                                                                                                                                                               |        |
| 17 |                           |                      |                                                                                                                                                                                                                                                                                                                                                                                                               |        |
| 18 |                           |                      |                                                                                                                                                                                                                                                                                                                                                                                                               |        |
| 19 |                           |                      |                                                                                                                                                                                                                                                                                                                                                                                                               |        |
| 20 |                           |                      |                                                                                                                                                                                                                                                                                                                                                                                                               |        |
| 21 | Allocation                | <a href="#">#16b</a> | Mechanism of implementing the allocation sequence (eg, central telephone; sequentially numbered, opaque, sealed envelopes), describing any steps to conceal the sequence until interventions are assigned                                                                                                                                                                                                     | 12, 13 |
| 22 | concealment               |                      |                                                                                                                                                                                                                                                                                                                                                                                                               |        |
| 23 | mechanism                 |                      |                                                                                                                                                                                                                                                                                                                                                                                                               |        |
| 24 |                           |                      |                                                                                                                                                                                                                                                                                                                                                                                                               |        |
| 25 |                           |                      |                                                                                                                                                                                                                                                                                                                                                                                                               |        |
| 26 |                           |                      |                                                                                                                                                                                                                                                                                                                                                                                                               |        |
| 27 |                           |                      |                                                                                                                                                                                                                                                                                                                                                                                                               |        |
| 28 | Allocation:               | <a href="#">#16c</a> | Who will generate the allocation sequence, who will enrol participants, and who will assign participants to interventions                                                                                                                                                                                                                                                                                     | 12, 13 |
| 29 | implementation            |                      |                                                                                                                                                                                                                                                                                                                                                                                                               |        |
| 30 |                           |                      |                                                                                                                                                                                                                                                                                                                                                                                                               |        |
| 31 |                           |                      |                                                                                                                                                                                                                                                                                                                                                                                                               |        |
| 32 | Blinding (masking)        | <a href="#">#17a</a> | Who will be blinded after assignment to interventions (eg, trial participants, care providers, outcome assessors, data analysts), and how                                                                                                                                                                                                                                                                     | 13     |
| 33 |                           |                      |                                                                                                                                                                                                                                                                                                                                                                                                               |        |
| 34 |                           |                      |                                                                                                                                                                                                                                                                                                                                                                                                               |        |
| 35 |                           |                      |                                                                                                                                                                                                                                                                                                                                                                                                               |        |
| 36 |                           |                      |                                                                                                                                                                                                                                                                                                                                                                                                               |        |
| 37 | Blinding (masking):       | <a href="#">#17b</a> | If blinded, circumstances under which unblinding is permissible, and procedure for revealing a participant's allocated intervention during the trial                                                                                                                                                                                                                                                          | N/A    |
| 38 | emergency unblinding      |                      |                                                                                                                                                                                                                                                                                                                                                                                                               |        |
| 39 |                           |                      |                                                                                                                                                                                                                                                                                                                                                                                                               |        |
| 40 |                           |                      |                                                                                                                                                                                                                                                                                                                                                                                                               |        |
| 41 |                           |                      |                                                                                                                                                                                                                                                                                                                                                                                                               |        |
| 42 |                           |                      |                                                                                                                                                                                                                                                                                                                                                                                                               |        |
| 43 | <b>Methods: Data</b>      |                      |                                                                                                                                                                                                                                                                                                                                                                                                               |        |
| 44 | <b>collection,</b>        |                      |                                                                                                                                                                                                                                                                                                                                                                                                               |        |
| 45 | <b>management, and</b>    |                      |                                                                                                                                                                                                                                                                                                                                                                                                               |        |
| 46 | <b>analysis</b>           |                      |                                                                                                                                                                                                                                                                                                                                                                                                               |        |
| 47 |                           |                      |                                                                                                                                                                                                                                                                                                                                                                                                               |        |
| 48 |                           |                      |                                                                                                                                                                                                                                                                                                                                                                                                               |        |
| 49 | Data collection plan      | <a href="#">#18a</a> | Plans for assessment and collection of outcome, baseline, and other trial data, including any related processes to promote data quality (eg, duplicate measurements, training of assessors) and a description of study instruments (eg, questionnaires, laboratory tests) along with their reliability and validity, if known. Reference to where data collection forms can be found, if not in the protocol. | 13, 14 |
| 50 |                           |                      |                                                                                                                                                                                                                                                                                                                                                                                                               |        |
| 51 |                           |                      |                                                                                                                                                                                                                                                                                                                                                                                                               |        |
| 52 |                           |                      |                                                                                                                                                                                                                                                                                                                                                                                                               |        |
| 53 |                           |                      |                                                                                                                                                                                                                                                                                                                                                                                                               |        |
| 54 |                           |                      |                                                                                                                                                                                                                                                                                                                                                                                                               |        |
| 55 |                           |                      |                                                                                                                                                                                                                                                                                                                                                                                                               |        |
| 56 |                           |                      |                                                                                                                                                                                                                                                                                                                                                                                                               |        |
| 57 |                           |                      |                                                                                                                                                                                                                                                                                                                                                                                                               |        |
| 58 |                           |                      |                                                                                                                                                                                                                                                                                                                                                                                                               |        |
| 59 |                           |                      |                                                                                                                                                                                                                                                                                                                                                                                                               |        |
| 60 |                           |                      |                                                                                                                                                                                                                                                                                                                                                                                                               |        |

**SPIRIT-PRO Elaboration/Extension:** Justify the PRO

instrument to be used and describe domains, number of items, recall period, and instrument scaling and scoring (e.g., range and direction of scores indicating a good or poor outcome). Evidence of PRO instrument measurement properties, interpretation guidelines, and patient acceptability and burden should be provided or cited if available, ideally in the population of interest. State whether the measure will be used in accordance with any user manual and specify and justify deviations if planned. Include a data collection plan outlining the permitted mode(s) of administration (e.g., paper, telephone, electronic, other) and setting (e.g., clinic, home, other). Specify if more than one language version will be used and state whether translated versions have been developed using currently recommended methods. When the trial context requires someone other than a trial participant to answer on his or her behalf (a proxy-reported outcome), state and justify the use of a proxy respondent. Provide or cite evidence of the validity of proxy assessment if available

|                                                                                                                                                                                                                   |                                     |                                                                                                                                                                                                                                                                                                                                                                                                                                                                                  |        |
|-------------------------------------------------------------------------------------------------------------------------------------------------------------------------------------------------------------------|-------------------------------------|----------------------------------------------------------------------------------------------------------------------------------------------------------------------------------------------------------------------------------------------------------------------------------------------------------------------------------------------------------------------------------------------------------------------------------------------------------------------------------|--------|
| 1<br>2<br>3<br>4<br>5<br>6<br>7<br>8<br>9<br>10<br>11<br>12<br>13<br>14<br>15<br>16<br>17<br>18<br>19<br>20<br>21<br>22<br>23<br>24<br>25<br>26<br>27<br>28<br>29<br>30<br>31<br>32<br>33<br>34<br>35<br>36<br>37 | Data collection plan:<br>retention  | <a href="#">#18b</a> Plans to promote participant retention and complete follow-up, including list of any outcome data to be collected for participants who discontinue or deviate from intervention protocols. <b>SPIRIT-PRO Elaboration/Extension:</b> Specify PRO data collection and management strategies for minimizing avoidable missing data. Describe the process of PRO assessment for participants who discontinue or deviate from the assigned intervention protocol | 12     |
| 38<br>39<br>40<br>41<br>42<br>43                                                                                                                                                                                  | Data management                     | <a href="#">#19</a> Plans for data entry, coding, security, and storage, including any related processes to promote data quality (eg, double data entry; range checks for data values). Reference to where details of data management procedures can be found, if not in the protocol                                                                                                                                                                                            | 15     |
| 44<br>45<br>46<br>47<br>48<br>49<br>50<br>51<br>52                                                                                                                                                                | Statistics: outcomes                | <a href="#">#20a</a> Statistical methods for analysing primary and secondary outcomes. Reference to where other details of the statistical analysis plan can be found, if not in the protocol. <b>SPIRIT-PRO Elaboration/Extension:</b> State PRO analysis methods, including any plans for addressing multiplicity/type I ( $\alpha$ ) error                                                                                                                                    | 15, 16 |
| 53<br>54<br>55<br>56                                                                                                                                                                                              | Statistics: additional analyses     | <a href="#">#20b</a> Methods for any additional analyses (eg, subgroup and adjusted analyses)                                                                                                                                                                                                                                                                                                                                                                                    | N/A    |
| 57<br>58<br>59<br>60                                                                                                                                                                                              | Statistics: analysis population and | <a href="#">#20c</a> Definition of analysis population relating to protocol non-adherence (eg, as randomised analysis), and any statistical methods                                                                                                                                                                                                                                                                                                                              |        |

|    |                      |                      |                                                                        |        |
|----|----------------------|----------------------|------------------------------------------------------------------------|--------|
| 1  | missing data         |                      | to handle missing data (eg, multiple imputation). <b>SPIRIT-PRO</b>    |        |
| 2  |                      |                      | <b>Elaboration/Extension:</b> State how missing data will be described |        |
| 3  |                      |                      | and outline the methods for handling missing items or entire           |        |
| 4  |                      |                      | assessments (e.g., approach to imputation and sensitivity analyses)    |        |
| 5  |                      |                      |                                                                        |        |
| 6  |                      |                      |                                                                        |        |
| 7  | <b>Methods:</b>      |                      |                                                                        |        |
| 8  | <b>Monitoring</b>    |                      |                                                                        |        |
| 9  |                      |                      |                                                                        |        |
| 10 | Data monitoring:     | <a href="#">#21a</a> | Composition of data monitoring committee (DMC); summary of             | 15     |
| 11 | formal committee     |                      | its role and reporting structure; statement of whether it is           |        |
| 12 |                      |                      | independent from the sponsor and competing interests; and              |        |
| 13 |                      |                      | reference to where further details about its charter can be found, if  |        |
| 14 |                      |                      | not in the protocol. Alternatively, an explanation of why a DMC is     |        |
| 15 |                      |                      | not needed                                                             |        |
| 16 |                      |                      |                                                                        |        |
| 17 |                      |                      |                                                                        |        |
| 18 |                      |                      |                                                                        |        |
| 19 |                      |                      |                                                                        |        |
| 20 | Data monitoring:     | <a href="#">#21b</a> | Description of any interim analyses and stopping guidelines,           | 15, 16 |
| 21 | interim analysis     |                      | including who will have access to these interim results and make       |        |
| 22 |                      |                      | the final decision to terminate the trial                              |        |
| 23 |                      |                      |                                                                        |        |
| 24 |                      |                      |                                                                        |        |
| 25 |                      |                      |                                                                        |        |
| 26 | Harms                | <a href="#">#22</a>  | Plans for collecting, assessing, reporting, and managing solicited     | 13, 14 |
| 27 |                      |                      | and spontaneously reported adverse events and other unintended         |        |
| 28 |                      |                      | effects of trial interventions or trial conduct. <b>SPIRIT-PRO</b>     |        |
| 29 |                      |                      | <b>Elaboration/Extension:</b> State whether or not PRO data will be    |        |
| 30 |                      |                      | monitored during the study to inform the clinical care of individual   |        |
| 31 |                      |                      | trial participants and, if so, how this will be managed in a           |        |
| 32 |                      |                      | standardized way. Describe how this process will be explained to       |        |
| 33 |                      |                      | participants; e.g., in the participant information sheet and consent   |        |
| 34 |                      |                      | form                                                                   |        |
| 35 |                      |                      |                                                                        |        |
| 36 |                      |                      |                                                                        |        |
| 37 |                      |                      |                                                                        |        |
| 38 |                      |                      |                                                                        |        |
| 39 |                      |                      |                                                                        |        |
| 40 | Auditing             | <a href="#">#23</a>  | Frequency and procedures for auditing trial conduct, if any, and       | N/A    |
| 41 |                      |                      | whether the process will be independent from investigators and the     |        |
| 42 |                      |                      | sponsor                                                                |        |
| 43 |                      |                      |                                                                        |        |
| 44 |                      |                      |                                                                        |        |
| 45 | <b>Ethics and</b>    |                      |                                                                        |        |
| 46 | <b>dissemination</b> |                      |                                                                        |        |
| 47 |                      |                      |                                                                        |        |
| 48 |                      |                      |                                                                        |        |
| 49 | Research ethics      | <a href="#">#24</a>  | Plans for seeking research ethics committee / institutional review     | 16     |
| 50 | approval             |                      | board (REC / IRB) approval                                             |        |
| 51 |                      |                      |                                                                        |        |
| 52 |                      |                      |                                                                        |        |
| 53 | Protocol amendments  | <a href="#">#25</a>  | Plans for communicating important protocol modifications (eg,          | 16     |
| 54 |                      |                      | changes to eligibility criteria, outcomes, analyses) to relevant       |        |
| 55 |                      |                      | parties (eg, investigators, REC / IRBs, trial participants, trial      |        |
| 56 |                      |                      | registries, journals, regulators)                                      |        |
| 57 |                      |                      |                                                                        |        |
| 58 |                      |                      |                                                                        |        |
| 59 |                      |                      |                                                                        |        |
| 60 |                      |                      |                                                                        |        |

|    |                                             |                      |                                                                                                                                                                                                                                                                                     |                |
|----|---------------------------------------------|----------------------|-------------------------------------------------------------------------------------------------------------------------------------------------------------------------------------------------------------------------------------------------------------------------------------|----------------|
| 1  | Consent or assent                           | <a href="#">#26a</a> | Who will obtain informed consent or assent from potential trial participants or authorised surrogates, and how (see Item 32)                                                                                                                                                        | 9, 10, 12      |
| 2  |                                             |                      |                                                                                                                                                                                                                                                                                     |                |
| 3  |                                             |                      |                                                                                                                                                                                                                                                                                     |                |
| 4  |                                             |                      |                                                                                                                                                                                                                                                                                     |                |
| 5  | Consent or assent: ancillary studies        | <a href="#">#26b</a> | Additional consent provisions for collection and use of participant data and biological specimens in ancillary studies, if applicable                                                                                                                                               | Appendix       |
| 6  |                                             |                      |                                                                                                                                                                                                                                                                                     |                |
| 7  |                                             |                      |                                                                                                                                                                                                                                                                                     |                |
| 8  |                                             |                      |                                                                                                                                                                                                                                                                                     |                |
| 9  | Confidentiality                             | <a href="#">#27</a>  | How personal information about potential and enrolled participants will be collected, shared, and maintained in order to protect confidentiality before, during, and after the trial                                                                                                | 15, 16, 17     |
| 10 |                                             |                      |                                                                                                                                                                                                                                                                                     |                |
| 11 |                                             |                      |                                                                                                                                                                                                                                                                                     |                |
| 12 |                                             |                      |                                                                                                                                                                                                                                                                                     |                |
| 13 |                                             |                      |                                                                                                                                                                                                                                                                                     |                |
| 14 | Declaration of interests                    | <a href="#">#28</a>  | Financial and other competing interests for principal investigators for the overall trial and each study site                                                                                                                                                                       | 19             |
| 15 |                                             |                      |                                                                                                                                                                                                                                                                                     |                |
| 16 |                                             |                      |                                                                                                                                                                                                                                                                                     |                |
| 17 |                                             |                      |                                                                                                                                                                                                                                                                                     |                |
| 18 | Data access                                 | <a href="#">#29</a>  | Statement of who will have access to the final trial dataset, and disclosure of contractual agreements that limit such access for investigators                                                                                                                                     | 17             |
| 19 |                                             |                      |                                                                                                                                                                                                                                                                                     |                |
| 20 |                                             |                      |                                                                                                                                                                                                                                                                                     |                |
| 21 |                                             |                      |                                                                                                                                                                                                                                                                                     |                |
| 22 |                                             |                      |                                                                                                                                                                                                                                                                                     |                |
| 23 | Ancillary and post trial care               | <a href="#">#30</a>  | Provisions, if any, for ancillary and post-trial care, and for compensation to those who suffer harm from trial participation                                                                                                                                                       | Appendix       |
| 24 |                                             |                      |                                                                                                                                                                                                                                                                                     |                |
| 25 |                                             |                      |                                                                                                                                                                                                                                                                                     |                |
| 26 |                                             |                      |                                                                                                                                                                                                                                                                                     |                |
| 27 | Dissemination policy: trial results         | <a href="#">#31a</a> | Plans for investigators and sponsor to communicate trial results to participants, healthcare professionals, the public, and other relevant groups (eg, via publication, reporting in results databases, or other data sharing arrangements), including any publication restrictions | Appendix<br>17 |
| 28 |                                             |                      |                                                                                                                                                                                                                                                                                     |                |
| 29 |                                             |                      |                                                                                                                                                                                                                                                                                     |                |
| 30 |                                             |                      |                                                                                                                                                                                                                                                                                     |                |
| 31 |                                             |                      |                                                                                                                                                                                                                                                                                     |                |
| 32 |                                             |                      |                                                                                                                                                                                                                                                                                     |                |
| 33 |                                             |                      |                                                                                                                                                                                                                                                                                     |                |
| 34 | Dissemination policy: authorship            | <a href="#">#31b</a> | Authorship eligibility guidelines and any intended use of professional writers                                                                                                                                                                                                      | 18             |
| 35 |                                             |                      |                                                                                                                                                                                                                                                                                     |                |
| 36 |                                             |                      |                                                                                                                                                                                                                                                                                     |                |
| 37 |                                             |                      |                                                                                                                                                                                                                                                                                     |                |
| 38 | Dissemination policy: reproducible research | <a href="#">#31c</a> | Plans, if any, for granting public access to the full protocol, participant-level dataset, and statistical code                                                                                                                                                                     | 19             |
| 39 |                                             |                      |                                                                                                                                                                                                                                                                                     |                |
| 40 |                                             |                      |                                                                                                                                                                                                                                                                                     |                |
| 41 | <b>Appendices</b>                           |                      |                                                                                                                                                                                                                                                                                     |                |
| 42 |                                             |                      |                                                                                                                                                                                                                                                                                     |                |
| 43 |                                             |                      |                                                                                                                                                                                                                                                                                     |                |
| 44 | Informed consent materials                  | <a href="#">#32</a>  | Model consent form and other related documentation given to participants and authorised surrogates                                                                                                                                                                                  | Appendix       |
| 45 |                                             |                      |                                                                                                                                                                                                                                                                                     |                |
| 46 |                                             |                      |                                                                                                                                                                                                                                                                                     |                |
| 47 |                                             |                      |                                                                                                                                                                                                                                                                                     |                |
| 48 | Biological specimens                        | <a href="#">#33</a>  | Plans for collection, laboratory evaluation, and storage of biological specimens for genetic or molecular analysis in the current trial and for future use in ancillary studies, if applicable                                                                                      | N/A            |
| 49 |                                             |                      |                                                                                                                                                                                                                                                                                     |                |
| 50 |                                             |                      |                                                                                                                                                                                                                                                                                     |                |
| 51 |                                             |                      |                                                                                                                                                                                                                                                                                     |                |
| 52 |                                             |                      |                                                                                                                                                                                                                                                                                     |                |

Chan A-W, Tetzlaff JM, Altman DG, Laupacis A, Gøtzsche PC, Krleža-Jerić K, Hróbjartsson A, Mann H, Dickersin K, Berlin J, Doré C, Parulekar W, Summerskill W, Groves T, Schulz K, Sox H, Rockhold FW, Rennie D, Moher D. SPIRIT 2013 Statement: Defining standard protocol items for clinical trials. *Ann Intern Med.* 2013;158(3):200-207

1 Calvert M, Kyle D, Mercieca-Bebber R, Slade A, Chan AW, King MT, and the SPIRIT-PRO Group. Guidelines  
2 for the Inclusion of Patient-Reported Outcomes in Clinical Trial Protocols, The SPIRIT-PRO Extension.  
3 JAMA. 2018; 319(5):483-494.  
4  
5  
6  
7  
8  
9  
10  
11  
12  
13  
14  
15  
16  
17  
18  
19  
20  
21  
22  
23  
24  
25  
26  
27  
28  
29  
30  
31  
32  
33  
34  
35  
36  
37  
38  
39  
40  
41  
42  
43  
44  
45  
46  
47  
48  
49  
50  
51  
52  
53  
54  
55  
56  
57  
58  
59  
60

For peer review only

# BMJ Open

## Development and Usability Testing of HEARTPA♀N: Protocol for a Mixed Methods Strategy to Develop an Integrated Smartphone and Web-Based Intervention for Women with Cardiac Pain

|                               |                                                                                                                                                                                                                                                                                                                                                                                                                                                                                                                                                                                                                                                                                                                                                                                                                                                                                                                                                                                                                                                                                                                                                                                                                                                                                                                                                                                                                                                                                                                                                                                                                                                                                                                                                                                                                                          |
|-------------------------------|------------------------------------------------------------------------------------------------------------------------------------------------------------------------------------------------------------------------------------------------------------------------------------------------------------------------------------------------------------------------------------------------------------------------------------------------------------------------------------------------------------------------------------------------------------------------------------------------------------------------------------------------------------------------------------------------------------------------------------------------------------------------------------------------------------------------------------------------------------------------------------------------------------------------------------------------------------------------------------------------------------------------------------------------------------------------------------------------------------------------------------------------------------------------------------------------------------------------------------------------------------------------------------------------------------------------------------------------------------------------------------------------------------------------------------------------------------------------------------------------------------------------------------------------------------------------------------------------------------------------------------------------------------------------------------------------------------------------------------------------------------------------------------------------------------------------------------------|
| Journal:                      | <i>BMJ Open</i>                                                                                                                                                                                                                                                                                                                                                                                                                                                                                                                                                                                                                                                                                                                                                                                                                                                                                                                                                                                                                                                                                                                                                                                                                                                                                                                                                                                                                                                                                                                                                                                                                                                                                                                                                                                                                          |
| Manuscript ID                 | bmjopen-2019-033092.R1                                                                                                                                                                                                                                                                                                                                                                                                                                                                                                                                                                                                                                                                                                                                                                                                                                                                                                                                                                                                                                                                                                                                                                                                                                                                                                                                                                                                                                                                                                                                                                                                                                                                                                                                                                                                                   |
| Article Type:                 | Protocol                                                                                                                                                                                                                                                                                                                                                                                                                                                                                                                                                                                                                                                                                                                                                                                                                                                                                                                                                                                                                                                                                                                                                                                                                                                                                                                                                                                                                                                                                                                                                                                                                                                                                                                                                                                                                                 |
| Date Submitted by the Author: | 30-Dec-2019                                                                                                                                                                                                                                                                                                                                                                                                                                                                                                                                                                                                                                                                                                                                                                                                                                                                                                                                                                                                                                                                                                                                                                                                                                                                                                                                                                                                                                                                                                                                                                                                                                                                                                                                                                                                                              |
| Complete List of Authors:     | <p>Parry, Monica; University of Toronto Lawrence S Bloomberg Faculty of Nursing,<br/> Dhukai, Abida; University of Toronto Lawrence S Bloomberg Faculty of Nursing<br/> Clarke, Hance; University Health Network, Pain Research Unit; University of Toronto<br/> Bjørnnes, Ann Kristin; Oslo Metropolitan University, Department of Nursing and Health Promotion<br/> Cafazzo, Joseph A.; University Health Network; University of Toronto<br/> Cooper, Lynn; Patient Advisor<br/> Harvey, Paula; Women's College Hospital; University of Toronto<br/> Katz, Joel; York University,<br/> Laloo, Chitra; The Peter Gilgan Centre for Research and Learning<br/> Leegaard, Marit; Oslo Metropolitan University<br/> Légaré, France; Université Laval, Médecine familiale<br/> Lovas, Mike; University Health Network<br/> McFetridge-Durdle, Judith; Florida State University, College of Nursing<br/> McGillion, Michael; McMaster University, Faculty of Health Sciences<br/> Norris, Colleen; University of Alberta, Faculty of Nursing<br/> Parente, Laura; University Health Network<br/> Patterson, Rose; Anishnawbe Health<br/> Pilote, Louise; McGill University, Medicine<br/> Pink, Leah; Sinai Health System<br/> Price, Jennifer; Women's College Hospital<br/> Stinson, Jennifer; The Peter Gilgan Centre for Research and Learning; University of Toronto, Lawrence S Bloomberg Faculty of Nursing<br/> Uddin, Akib; University Health Network<br/> Victor, J. Charles; University of Toronto<br/> Watt-Watson, Judy; University of Toronto, Lawrence S Bloomberg Faculty of Nursing<br/> Auld, Carol; Patient Advisor<br/> Faubert, Christine; Patient Advisor<br/> Park, Deborah; Patient Advisor<br/> Park, Marianne; Patient Advisor<br/> Rickard, Beatrice; Patient Advisor<br/> DeBonis, Vincenza; Patient Advisor</p> |
| <b>Primary Subject            | Cardiovascular medicine                                                                                                                                                                                                                                                                                                                                                                                                                                                                                                                                                                                                                                                                                                                                                                                                                                                                                                                                                                                                                                                                                                                                                                                                                                                                                                                                                                                                                                                                                                                                                                                                                                                                                                                                                                                                                  |



1  
2  
3  
4  
5  
6  
7  
8  
9  
10  
11  
12  
13  
14  
15  
16  
17  
18  
19  
20  
21  
22  
23  
24  
25  
26  
27  
28  
29  
30  
31  
32  
33  
34  
35  
36  
37  
38  
39  
40  
41  
42  
43  
44  
45  
46  
47  
48  
49  
50  
51  
52  
53  
54  
55  
56  
57  
58  
59  
60

|                            |                                                                                                                                             |
|----------------------------|---------------------------------------------------------------------------------------------------------------------------------------------|
| Heading                    |                                                                                                                                             |
| Secondary Subject Heading: | Health services research, Communication, Patient-centred medicine                                                                           |
| Keywords:                  | Coronary heart disease < CARDIOLOGY, Coronary intervention < CARDIOLOGY, PAIN MANAGEMENT, Women, Self-Management, Patient Reported Outcomes |
|                            |                                                                                                                                             |

SCHOLARONE™  
Manuscripts

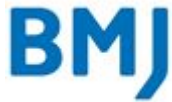

I, the Submitting Author has the right to grant and does grant on behalf of all authors of the Work (as defined in the below author licence), an exclusive licence and/or a non-exclusive licence for contributions from authors who are: i) UK Crown employees; ii) where BMJ has agreed a CC-BY licence shall apply, and/or iii) in accordance with the terms applicable for US Federal Government officers or employees acting as part of their official duties; on a worldwide, perpetual, irrevocable, royalty-free basis to BMJ Publishing Group Ltd ("BMJ") its licensees and where the relevant Journal is co-owned by BMJ to the co-owners of the Journal, to publish the Work in this journal and any other BMJ products and to exploit all rights, as set out in our [licence](#).

The Submitting Author accepts and understands that any supply made under these terms is made by BMJ to the Submitting Author unless you are acting as an employee on behalf of your employer or a postgraduate student of an affiliated institution which is paying any applicable article publishing charge ("APC") for Open Access articles. Where the Submitting Author wishes to make the Work available on an Open Access basis (and intends to pay the relevant APC), the terms of reuse of such Open Access shall be governed by a Creative Commons licence – details of these licences and which [Creative Commons](#) licence will apply to this Work are set out in our licence referred to above.

Other than as permitted in any relevant BMJ Author's Self Archiving Policies, I confirm this Work has not been accepted for publication elsewhere, is not being considered for publication elsewhere and does not duplicate material already published. I confirm all authors consent to publication of this Work and authorise the granting of this licence.

1  
2 **Title:** Development and Usability Testing of HEARTPA♀N: Protocol for a Mixed Methods  
3  
4 Strategy to Develop an Integrated Smartphone and Web-Based Intervention for Women with  
5  
6 Cardiac Pain  
7

8  
9  
10 **Authors and Affiliations:** Monica Parry,<sup>1</sup> Abida Dhukai,<sup>1</sup> Hance Clarke,<sup>1,2</sup> Ann Kristin  
11  
12 Bjørnnes,<sup>3</sup> Joseph Cafazzo,<sup>1,2</sup> Lynn Cooper,<sup>4</sup> Paula Harvey,<sup>5</sup> Joel Katz,<sup>6</sup> Chitra Lalloo,<sup>7</sup> Marit  
13  
14 Leegaard,<sup>3</sup> France Légaré,<sup>8</sup> Mike Lovas<sup>2</sup>, Judith McFetridge-Durdle,<sup>9</sup> Michael H. McGillion,<sup>10</sup>  
15  
16 Colleen Norris,<sup>11</sup> Laura Parente<sup>2</sup>, Rose Patterson,<sup>12</sup> Louise Pilote,<sup>13</sup> Leah Pink,<sup>14</sup> Jennifer Price,<sup>5</sup>  
17  
18 Jennifer Stinson,<sup>7</sup> Akib Uddin<sup>2</sup>, Charles Victor,<sup>1</sup> Judy Watt-Watson,<sup>1</sup> Carol Auld,<sup>4</sup> Christine  
19  
20 Faubert,<sup>4</sup> Deborah Park,<sup>4</sup> Marianne Park,<sup>4</sup> Beatrice Rickard,<sup>4</sup> Vincenza Spiteri DeBonis<sup>4</sup>  
21  
22

23  
24 <sup>1</sup>University of Toronto, Toronto, Ontario, Canada

25  
26 <sup>2</sup>University Health Network, Toronto, Ontario, Canada

27  
28 <sup>3</sup>Oslo Metropolitan University, Oslo, Norway

29  
30 <sup>4</sup>Patient Advisor, Ontario, Canada

31  
32 <sup>5</sup>Women's College Hospital, Toronto, Ontario, Canada

33  
34 <sup>6</sup>York University, Toronto, Ontario, Canada

35  
36 <sup>7</sup>The Peter Gilgan Centre for Research and Learning, Toronto, Ontario, Canada

37  
38 <sup>8</sup>Université Laval, Laval, Quebec, Canada

39  
40 <sup>9</sup>Florida State University, Tallahassee, Florida, USA

41  
42 <sup>10</sup>McMaster University, Hamilton, Ontario, Canada

43  
44 <sup>11</sup>University of Alberta, Edmonton, Alberta, Canada

45  
46 <sup>12</sup>Anishnawbe Health, Toronto, Ontario, Canada

47  
48 <sup>13</sup>Research Institute of the McGill University Health Centre/Institut de recherche du Centre  
49  
50 universitaire de santé McGill, Montreal, Quebec, Canada

51  
52 <sup>14</sup>Sinai Health System, Toronto, Ontario, Canada  
53  
54  
55

1  
2 **Corresponding Author:** Dr. Monica Parry, Lawrence S. Bloomberg Faculty of Nursing  
3 155 College Street, Suite 130, Toronto, ON, Canada, M5T 1P8  
4

5 Phone: 416-946-3561, Fax: 416-978-8222, Email: [monica.parry@utoronto.ca](mailto:monica.parry@utoronto.ca)  
6  
7

8 **Word count:** 3,716  
9

10  
11 **Protocol version** 2.0, December 21/2019  
12  
13  
14  
15  
16  
17  
18  
19  
20  
21  
22  
23  
24  
25  
26  
27  
28  
29  
30  
31  
32  
33  
34  
35  
36  
37  
38  
39  
40  
41  
42  
43  
44  
45  
46  
47  
48  
49  
50  
51  
52  
53  
54  
55  
56  
57  
58  
59  
60

## ABSTRACT

**Introduction** More women experience cardiac pain related to coronary artery disease (CAD) and cardiac procedures compared to men. The overall goal of this program of research is to develop an integrated smartphone and web-based intervention (HEARTPA♀N) to help women recognize and self-manage cardiac pain.

**Methods and analysis** This protocol outlines the mixed methods strategy used for the development of the HEARTPA♀N content/core feature-set (Phase 2A), usability testing (Phase 2B) and evaluation with a pilot randomized controlled trial (RCT) (Phase 3). We are using the individual and family self-management theory, mobile device functionality and pervasive information architecture of mHealth interventions, and following a sequential phased approach recommended by the Medical Research Council (MRC) to develop HEARTPA♀N. The Phase 3 pilot RCT will enable us to refine the prototype, inform the methodology, and calculate the sample size for a larger multisite RCT (Phase 4, future work). Patient partners have been actively involved in setting the HEARTPA♀N research agenda, including defining patient-oriented outcome measures (PROMs) for the pilot RCT: pain and health-related quality of life (HRQoL). As such, the guidelines for Inclusion of Patient-Reported Outcomes in Clinical Trial Protocols (SPIRIT-PRO) are used to report the protocol for the pilot RCT (Phase 3). Quantitative data (e.g., demographic and clinical information) will be summarized using descriptive statistics (Phases 2AB, 3) and a content analysis will be used to identify themes (Phase 2AB). A process evaluation will be used to assess the feasibility of the implementation of the intervention and a preliminary efficacy evaluation will be undertaken focusing on the outcomes of pain and HRQoL (Phase 3).

**Ethics and dissemination** Ethics approval was obtained from the University of Toronto (36415, November 26<sup>th</sup>, 2018). We will disseminate knowledge of HEARTPA♀N through publication, conference presentation and national public forums (Café Scientifiques), and through fact sheets,

1  
2 Tweets, and webinars.  
3

4 **Trial Registration Number** NCT03800082 (Date of Registration January 11, 2019)  
5  
6  
7  
8  
9  
10  
11  
12  
13  
14  
15  
16  
17  
18  
19  
20  
21  
22  
23  
24  
25  
26  
27  
28  
29  
30  
31  
32  
33  
34  
35  
36  
37  
38  
39  
40  
41  
42  
43  
44  
45  
46  
47  
48  
49  
50  
51  
52  
53  
54  
55  
56  
57  
58  
59  
60

## Strengths and limitations of this study

- Robust methods guided by the individual and family self-management theory, mobile device functionality, and the sequential phased approach recommended by the Medical Research Council (MRC)
- Sustainable HEARTPA♀N design and development based on the real needs of women with oversight by a Patient partner Advisory Committee (PAC)
- Extensive recruitment and solid retention strategies using gender and culturally sensitive research methods
- Larger pilot RCT focused on feasibility and primary evaluation of efficacy will increase precision of estimates and provide robust data to inform the design of a future full-scale RCT

## INTRODUCTION

Cardiac pain is a key symptom of coronary artery disease (CAD) and acute coronary syndrome (ACS). Women have a varied pattern and distribution of cardiac pain and/or cardiac pain symptoms associated with both obstructive (macrovascular) and non-obstructive (microvascular) CAD. Women with obstructive CAD are usually 7 to 10 years older than men<sup>1</sup> and present with coronary atherosclerosis and risk of atherosclerotic plaque rupture and/or erosion<sup>2</sup>. Compared to men, women with obstructive CAD who undergo a percutaneous coronary intervention (PCI)<sup>3</sup> and/or cardiac surgery<sup>4-6</sup> have more persistent pain of moderate to severe intensity<sup>7</sup>. The origin of this pain is complex, and thought to be pathophysiologic (e.g., scar tissue, damage to intercostal nerves) and/or psychological (e.g., anxiety) in origin<sup>8</sup>. Non-obstructive CAD is cardiac pain without evidence of coronary artery obstruction<sup>9</sup>, defined as less than a 50% epicardial coronary lesion on angiography<sup>10</sup>. Coronary microvascular dysfunction/coronary spasm and coronary micro embolism also contribute to ischemia in non-obstructive CAD<sup>11</sup>. Recent evidence suggests that up to 67% of women who present with cardiac pain and/or cardiac pain symptoms have ischemia related to non-obstructive CAD<sup>12</sup>. Non-obstructive CAD is more prevalent in younger, middle-aged women and evidence suggests that more extensive, non-obstructive CAD is associated with major adverse events (MACE) similar to those with obstructive CAD<sup>13</sup>. Obstructive/non-obstructive CAD is the leading cause of death of women across all ages, and recent data show an increase in CAD incidence and deaths among women 45 to 54 years of age<sup>14</sup>.

Many women describe typical obstructive and non-obstructive cardiac pain as tight, heavy and dull with additional symptoms that include nausea and palpitations<sup>15</sup>, and/or dyspnea, weakness and unusual fatigue<sup>16</sup>. Women also report that their cardiac pain is more likely to radiate to their left arm, back and/or jaw and neck<sup>15</sup>. Women describe persistent post-sternotomy pain as aching, tender and exhausting<sup>17</sup>. This varied pattern and distribution of symptoms make it



1  
2 difficult for women to interpret as cardiac-related (i.e., obstructive/non-obstructive or post  
3  
4 PCI/cardiac surgery)<sup>13,18,19</sup>. Women also minimize symptoms, prefer to consult with family and  
5  
6 friends, have caring responsibilities and concerns for their family<sup>20</sup>. As a result, women delay  
7  
8 seeking appropriate care for their cardiac pain<sup>21</sup>. The time from symptom onset to emergency  
9  
10 department (ED) arrival for women is 85 to 320 minutes, this has not changed in the last  
11  
12 decade<sup>22</sup>.

15  
16 Women with cardiac pain due to obstructive/non-obstructive CAD and/or post  
17  
18 PCI/cardiac surgery pain are frequent users of health care services<sup>23</sup> and at risk for impaired  
19  
20 function, depression, poor health-related quality of life (HRQoL), and death<sup>24</sup>. Women have been  
21  
22 historically underrepresented in cardiovascular clinical trials<sup>25,26</sup>, with much of the current  
23  
24 evidence comparing cardiac pain and/or cardiac pain symptoms in women to men. There is little  
25  
26 evidence focused on interventions to assist women to recognize and manage cardiac pain and/or  
27  
28 cardiac pain symptoms<sup>27</sup>. Self-management interventions allow people to take an active part in  
29  
30 the management of their own conditions<sup>28</sup> and are important predictors of successful behavior  
31  
32 change<sup>29</sup>. In addition to reducing pain, self-management interventions improve HRQoL<sup>30-35</sup>. A  
33  
34 current mixed methods systematic review of self-management programs (HEARTPA♀N, *Phase*  
35  
36 *I*), which included women greater than 18 years of age with cardiac pain, found self-management  
37  
38 interventions for cardiac pain were more effective if they included a greater proportion of women  
39  
40 (p=0.02), goal setting (p=0.03) and collaboration/support from health care providers (HCPs)  
41  
42 (p=0.01)<sup>36</sup>. Mobile health (mHealth) technologies have been developed to help women self-  
43  
44 manage weight<sup>37-41</sup>, increase physical activity<sup>42</sup>, monitor for perinatal depression, and assist with  
45  
46 postpartum smoking cessation<sup>43</sup>. Many women view mobile health technologies as novel and  
47  
48 supportive<sup>37</sup>, and indicate these technologies motivate healthy behaviors, reduce symptoms<sup>44</sup>, and  
49  
50 improve HRQoL<sup>44</sup>. Health app usage across all ages is on the rise<sup>45,46</sup>, yet there is little objective  
51  
52  
53  
54  
55  
56  
57  
58  
59  
60

1  
2 rigorous research evaluating outcomes of smartphone-based interventions<sup>47</sup>. The benefits of  
3  
4 mHealth interventions in healthcare are compelling; smartphones are portable, they offer  
5  
6 connectivity, and they provide access to women who are difficult to reach, yet no smartphone or  
7  
8 web-based self-management program has been developed and tested with women who have  
9  
10 cardiac pain and/or cardiac pain symptoms.  
11

## 12 13 **OBJECTIVES**

14  
15 The overall goal of this program of research is to develop and systematically evaluate an  
16  
17 integrated smartphone and web-based intervention (HEARTPA♀N) to provide evidence-  
18  
19 informed symptom triage and self-management support to reduce pain and increase HRQoL in  
20  
21 women with cardiac pain and/or cardiac pain symptoms. Specific objectives for each phase of  
22  
23 development/evaluation include: 1) develop the HEARTPA♀N content and core feature-set  
24  
25 (*Phase 2A*), 2) conduct usability testing (*Phase 2B*), and 3) assess feasibility in terms of  
26  
27 implementation (accrual rates, acceptability and level of engagement) and determine an initial  
28  
29 estimation of effectiveness outcomes (estimates of magnitude of effect) in a pilot RCT (*Phase 3*).  
30  
31

32  
33 The Phase 3 pilot study will enable us to refine the prototype, inform the methodology, and  
34  
35 calculate the sample size for a larger multisite RCT (*Phase 4*, future work).  
36  
37

## 38 39 **METHODS AND ANALYSIS**

### 40 41 **Phases 2A and 2B**

42  
43 We are using the individual and family self-management theory<sup>48,49</sup>, mobile device functionality  
44  
45 and the pervasive information architecture of mHealth interventions<sup>50</sup>, and following the  
46  
47 sequential phased approach recommended by the Medical Research Council (MRC)<sup>51-53</sup> and used  
48  
49 by Stinson and others<sup>53,54</sup> to develop HEARTPA♀N. We will develop the HEARTPA♀N  
50  
51 content/core feature-set and conduct usability testing (*Phases 2A and 2B*) to ensure it is easy to  
52  
53 use, efficient and satisfying to operate.  
54  
55  
56  
57  
58  
59  
60

## Study design

Focus group interviews in *Phase 2A* will assist to: 1) learn about the experiences and health care needs of women with cardiac pain/cardiac pain symptoms from the perspectives of women, 2) design content and the core feature-set of HEARTPA♀N, and 3) validate the HEARTPA♀N triage algorithms with health care providers (HCPs). This feature-set will include evidence-informed symptom triage algorithms to help women recognize their cardiac pain/cardiac pain symptoms and seek appropriate care. The usability testing in *Phase 2B* will focus on user performance (ease of use, efficiency, ease of learning, and errors) and satisfaction with program content and functionality (reports, goal setting)<sup>55</sup>.

## Eligibility criteria

Women living in Canada greater than 18 years of age with obstructive/non-obstructive CAD pain and/or pain post PCI/cardiac surgery lasting greater than 3 months. All women will be required to speak and read English and will be excluded if they have severe cognitive impairment assessed using the Six-Item Screener administered by telephone or in face-to-face interview<sup>56,57</sup>, or major comorbid medical or psychiatric illness that could preclude their ability to participate in an interview. HCPs will include physicians and nurses/nurse practitioners who have worked in cardiology, family medicine, or in an emergency department (ED) for at least one year; trainees, whose presence in the clinical setting is often transient will be excluded.

## Study setting

*Phase 2A* one-hour focus group interviews will be scheduled at a mutually convenient time for participants, and conducted by telephone, using ZOOM online video conferencing technology, or face-to-face in a location suitable to participants and free from distractions<sup>58</sup>. *Phase 2B* participants will complete a one-on-one observation for 60-90 minutes in a quiet room within the labs at Healthcare Human Factors in Toronto, Ontario, Canada.

## Procedures

*Phase 2A.* Following ethics approval, a purposive sample of women with obstructive (n=10)/non-obstructive (n=10) CAD pain and post PCI/cardiac surgery pain (n=10) will be recruited for focus group interviews through cardiology, cardiac surgery and pain clinics, and using social media platforms (e.g., Twitter, Facebook). HCPs (n=10) will also be recruited for a separate focus group interview via letters and emails. We will use a semi-structured interview guide to explore the views, experiences and beliefs/motivations<sup>58</sup> of women with cardiac pain. We will also use a semi-structured interview guide to validate the triage algorithms with HCPs. Interviews will be conducted by two team members experienced in conducting interviews and techniques will be used to minimize power differentials, such as establishing rapport, active listening, and relaxed body language<sup>59</sup>.

*Phase 2B.* Based on previous experience<sup>60-62</sup> and recommendations that usability testing by 3 - 5 users finds approximately 85% of interface usability problems<sup>63,64</sup>, each usability cycle will include 5 end-users (per pain type – obstructive [n=5]/non-obstructive [n=5] CAD, and pain post PCI/cardiac surgery [n=5]). Women will be provided with a brief explanation of the HEARTPA♀N intervention and then asked to move through standardized scenarios and list of features including the about you, event profile, goal setting features, graphics, audio and video clips, and interactive components (reporting, symptom triage algorithms, self-management skills). We will employ a ‘think aloud’ approach<sup>65</sup> to gather insight into the way users solve problems as they move through the application in a systematic way. Comments will be recorded, and the project coordinator will make field notes about any problems encountered on the Usability Testing Error and Efficiency Documentation Form. At the end of the session, participants will be asked to complete the System Usability Scale (SUS)<sup>66</sup>. The SUS has been used across a wide range of user interfaces, including Web pages and Web applications<sup>67</sup>. The ten

1  
2 5-point Likert questions can be scored to provide a point estimate of usability with a reported  
3  
4 reliability of 0.85<sup>67</sup>. In addition, four semi-structured questions will be asked to determine users'  
5  
6 overall impression of HEARTPA♀N, what they liked and why, what could be improved, and if  
7  
8 anything was missing<sup>62</sup>. Observations will be conducted in iterative cycles. After the first cycle,  
9  
10 changes will be made to the interface based on comments from the content analysis of the  
11  
12 audiotapes and field notes. The revised user interface will then be evaluated in a subsequent  
13  
14 cycle. These iterations usually require 2-3 testing cycles with each end-user group until no further  
15  
16 comments are identified<sup>62,63,68</sup>.  
17  
18

### 19 Outcomes

20  
21 We will use the summary matrix from our integrated mixed methods systematic review (*Phase*  
22  
23 *1*)<sup>36</sup> and the results from focus group interviews (*Phase 2A*) to discuss HEARTPA♀N designs  
24  
25 with women who have cardiac pain in a consensus workshop with our Human Factors Designers.  
26  
27 HEARTPA♀N will be designed for a consistent experience for women, and developed on a web-  
28  
29 based platform, with easy access on any device with a web-browser, including smartphones and  
30  
31 tablets<sup>69,70</sup>. HEARTPA♀N's web-based approach will allow for faster maintenance, easier  
32  
33 updates to content, as well as improved accessibility for users<sup>71</sup>. All HEARTPA♀N content will  
34  
35 be written at a grade 5 to 6 reading level<sup>72</sup>, and communication with a central database server will  
36  
37 occur through secure Internet connections. Women with cardiac pain will be able to participate in  
38  
39 realistic scenarios in a simulated environment (*Phase 2B*) in order to assess the appropriateness  
40  
41 and ease of use of HEARTPA♀N prior to the *Phase 3* pilot RCT.  
42  
43  
44  
45  
46

### 47 **Phase 3**

48  
49 The HEARTPA♀N intervention is the first of its kind; there are no previous trials of the efficacy  
50  
51 of such an intervention to decrease pain and improve HRQoL in women with cardiac pain/cardiac  
52  
53 pain symptoms. We will undertake a process and preliminary effect evaluation of the  
54  
55  
56  
57  
58  
59

1 HEARTPA♀N intervention for women with cardiac pain, as guided by the MRC framework<sup>51-53</sup>.

2  
3  
4 The guidelines for Inclusion of Patient-Reported Outcomes in Clinical Trial Protocols (SPIRIT-  
5  
6  
7 PRO) are used to report the protocol for this pilot RCT.

#### 8 9 Study design

10  
11 A two group parallel single blind pilot RCT.

#### 12 13 Eligibility criteria

14  
15 Inclusion/ exclusion criteria have been previously described (*Phases 2A and 2B*). Additional  
16  
17 exclusion criteria will include women who participated in Phase 2A or 2B studies.

#### 18 19 Study setting

20  
21 Participants will attend one in-person session to learn about the trial, obtain informed written  
22  
23 consent, and complete demographic, clinical and baseline measures (T1). Participants allocated to  
24  
25 the intervention group will also learn how to use the HEARTPA♀N intervention. The  
26  
27 intervention will be delivered on restricted password-protected applications.

#### 28 29 Procedures

30  
31 Following ethics approval, a single coordinating center (University of Toronto) will recruit  
32  
33 women using methods described previously (*Phases 2A and 2B*). Interested participants will  
34  
35 contact the project coordinator by telephone or express their interest using the HEARTPA♀N  
36  
37 website. Eligibility criteria will be confirmed, verbal consent obtained, and an appointment for an  
38  
39 initial study visit will be made. The project coordinator will track the number of eligible  
40  
41 participants approached and reasons for refusal using a study log. We will use multiple methods  
42  
43 to promote recruitment and retention, such as reimbursing participants for travel costs related to  
44  
45 the initial study visit and reimbursement for use of their smartphone and data plan (\$85) for the  
46  
47 duration of the study. The project coordinator will send email and postcard reminders and at 3  
48  
49 months, participants will be telephoned (standardized script) to complete post-test measures  
50  
51  
52  
53  
54  
55  
56  
57  
58  
59  
60

1  
2 online at home. Gift cards will be provided at study completion (\$25). We anticipate minimal  
3  
4 loss to follow-up as reported in previous pilot studies<sup>73</sup>. However, logins every one to two days  
5  
6 for 3 months may be burdensome for women, which we will assess in our process evaluation.  
7  
8 The project coordinator will also be available to address questions, issues, and concerns without  
9  
10 delay and all T2 assessments will be completed online, eliminating the need for participants to  
11  
12 return to the study center.  
13  
14

15  
16 *Randomization.* Following completion of baseline measures, participants will be  
17  
18 randomized to the control or intervention group at a 1:1 ratio in blocks of four stratified by type  
19  
20 of cardiac pain<sup>74,75</sup> (obstructive CAD, non-obstructive CAD, and post PCI/cardiac surgery).  
21  
22 Randomization will be managed centrally using a web-based randomization service  
23  
24 ([www.randomize.net/](http://www.randomize.net/)).  
25  
26

27  
28 *Allocation.* Participants allocated to the control group will receive the usual care and  
29  
30 supports provided to women with cardiac pain/cardiac pain symptoms, including usual clinic  
31  
32 appointments and follow-up. With detailed informed consent procedures, it is expected that  
33  
34 women will accept their group allocation following randomization. Participants randomized to  
35  
36 the intervention group will consist of use of the HEARTPA♀N intervention every one to two  
37  
38 days, in addition to usual care, for a period of 3 months. The HEARTPA♀N intervention will be  
39  
40 delivered on restricted password-protected applications that will permit tracking of adherence  
41  
42 (number of logins to app and website using Google Analytics). Participants will be encouraged to  
43  
44 log-in to HEARTPA♀N every one to two days (via automated alerts) over the 3-month period to  
45  
46 develop and track goals related to pain, activities, sleep, and emotions. Participants will be  
47  
48 directed to the project coordinator for technical problems.  
49  
50  
51

52  
53 *Blinding.* It is not possible to blind the participants to group allocation due to the specific  
54  
55 nature of the HEARTPA♀N intervention; however, a data analyst at the University of Toronto's  
56  
57  
58  
59

1  
2 Faculty of Nursing who is blinded to treatment allocation will conduct the analysis ensuring  
3  
4 neutrality of the outcome assessment.  
5

## 6 Outcomes

7  
8 A process evaluation will be used to assess the feasibility of the implementation of the  
9  
10 intervention. Recruitment and retention will be determined through the use of the study log,  
11  
12 which will document each potential participant contacted, whether or not they chose to  
13  
14 participate in the trial, reasons for non-participation, whether or not they completed follow-up  
15  
16 assessments and reasons for dropout. Issues and/or difficulties encountered during trial  
17  
18 implementation will be tracked. Adverse events will be recorded on an Adverse Event Form and  
19  
20 engagement will be assessed using Google Analytics. We will assess acceptability and  
21  
22 satisfaction at the end of the 3-month period in all participants in the intervention group using a  
23  
24 modified Acceptability e-Scale (AES)<sup>76</sup>. A preliminary efficacy evaluation will also be  
25  
26 undertaken focusing on the outcomes of pain and HRQoL. Pain will be measured using the Brief  
27  
28 Pain Inventory-Short Form (BPI-SF), which rates pain severity and the degree to which pain  
29  
30 interferes with mood, sleep, and other physical activities such as work, social activity and  
31  
32 relations with others. It has good construct validity<sup>77,78</sup>, reliability is reported at 0.86 to 0.91<sup>77</sup>,  
33  
34 and it has detected clinically important differences<sup>4,73,79</sup>. HRQoL will be measured using the SF-  
35  
36 36v2<sup>TM</sup>, which contains 36 items and yields a score for each of the 8 domains of health: physical  
37  
38 functioning, role limitations due to physical health (role-physical), bodily pain, general health  
39  
40 perceptions, vitality, social functioning, role limitations due to emotional problems (role  
41  
42 emotional), and mental health<sup>80</sup>. It has an internal consistency of 0.76 to 0.94<sup>81,82</sup> with construct,  
43  
44 criterion and predictive validity<sup>82</sup>. A participant flow diagram is included in Figure 1.  
45  
46  
47  
48  
49  
50  
51

52 -Insert Figure 1-  
53

## 54 Sample size

55  
56  
57  
58  
59  
60



1  
2 As this is a pilot trial focused on feasibility and primary evaluation of efficacy, we are not testing  
3  
4 for statistical significance<sup>83</sup>. To decide on a sample size, we used the confidence interval  
5  
6 approach based on the feasibility outcomes of recruitment and retention. For a one-sided 95%  
7  
8 confidence interval for the proportion of women recruited and a margin of error of 0.05 (the  
9  
10 lower bound) we would need at least 81 participants to estimate an overall recruitment rate of  
11  
12 0.70. A sample of  $n=49$  would be needed to estimate an overall retention rate of 85%; however,  
13  
14 to estimate retention separately in the intervention and control groups, we will need a total  
15  
16 sample size of 98 ( $49*2$ ). As attrition is one of our measured feasibility outcomes, we have not  
17  
18 accounted for it in the sample size calculations.  
19  
20  
21

## 22 Data management

23  
24 Data will be collected using the HEARTPA♀N application, as well as surveys and stored on a  
25  
26 password-protected server. The trial steering committee includes all research and PAC team  
27  
28 members. As this is a pilot trial, there is not a separate data monitoring and safety committee.  
29  
30

## 31 Statistical methods

32  
33  
34 *Process Evaluation.* Prevalence of refusal, retention, engagement with the intervention  
35  
36 and technical difficulties reported will be calculated, along with their 95% confidence intervals.  
37  
38 Mean acceptability and satisfaction will be calculated from the total score of the Acceptability e-  
39  
40 Scale, along with its standard deviation. We will record symptom descriptions and use of the  
41  
42 symptom triage algorithms, what women did as a result of this recommendation (e.g., self-  
43  
44 management, contact with primary HCP, ED visit). Qualitative process data collected will be  
45  
46 analyzed using methods appropriate to the data obtained.  
47  
48  
49

50  
51 *Primary Effect Evaluation.* We will investigate the variability and sensitivity to change  
52  
53 for outcomes of pain and HRQoL (T2-T1). We will calculate the number of participants who  
54  
55 report clinically meaningful decreases in pain, which has been defined for the BPI-SF as a two-  
56  
57  
58  
59

1 point difference in worst pain<sup>84</sup>. Variability will be estimated using the mean/median scores and  
2 standard deviation, in each group separately, at pre and post-test. Similarly, sensitivity to change  
3 will be assessed by determining the number of participants who had a clinically meaningful  
4 increase in HRQoL scores over time. Although the study will not be powered to detect significant  
5 differences, we will use multiple regression to estimate the effect of group allocation on each  
6 outcome (separately) at post-test, adjusting for baseline scores. This will help determine the  
7 magnitude and direction of effect and provide a signal of the intervention's effectiveness. The  
8 analysis will be conducted using an intent-to-treat approach. As this is a pilot trial, no interim  
9 analyses are planned.

## 22 PATIENT AND PUBLIC INVOLVEMENT

23 Seven women (LC, CA, CF, DP, MP, BR, VSD) with cardiac pain formed the HEARTPA♀N  
24 PAC. They were actively involved in *Phase 1* of this research program (e.g., defining search  
25 terms for our systematic review) and continue to be actively involved in setting the  
26 HEARTPA♀N research agenda for *Phases 2A, 2B and 3*. This includes assisting to define the  
27 scope of the project (e.g., defining patient-reported outcome measures [PROMs] for the pilot  
28 RCT), active involvement in recruitment activities, assisting to write project quarterly  
29 newsletters, and participation in all team meetings. They will be invited to be co-presenters at  
30 scientific conference meetings and public forums (Café Scientifiques) and will assist to write lay  
31 summaries and fact sheets for each phase of our project.

## 45 ETHICS AND DISSEMINATION

46 Ethics approval was obtained from the University of Toronto (36415, November 26<sup>th</sup>, 2018). This  
47 is a 3-year study, Phase 2A recruitment began in March 2019. Informed consent will be obtained  
48 on participants (Supplementary material). To ensure privacy during the pilot RCT, all personally  
49 identifying information will be stored on a separate database from health data on the app.

1  
2 Information that is sent to the smartphone or used by the reporting system will be independent of  
3  
4 their personal information. No personal information will be transmitted after the initial set-up.  
5  
6 For security issues, information that is transmitted will be sent securely via encrypted HTTPS  
7  
8 connection, preventing interception by a third party. All electronic entries will be backed up on a  
9  
10 central server and communication with the central database server will occur through secure  
11  
12 Internet connections. Only the principal investigator and project coordinator will have access to  
13  
14 the data. We will disseminate knowledge of HEARTPA♀N through publication, conference  
15  
16 presentation and educational national public forums (Café Scientifiques), and through fact sheets,  
17  
18 Tweets, and webinars posted in the Women's Xchange Knowledge Translation and Exchange  
19  
20 Centre as well as to key stakeholders and programs.  
21  
22  
23  
24  
25  
26  
27  
28  
29  
30  
31  
32  
33  
34  
35  
36  
37  
38  
39  
40  
41  
42  
43  
44  
45  
46  
47  
48  
49  
50  
51  
52  
53  
54  
55  
56  
57  
58  
59  
60

1  
2 **Acknowledgements** We would like to thank the PAC for their active involvement in setting the  
3  
4 HEARTPA♀N research agenda, including providing letters of support and defining patient-  
5  
6 oriented outcome measures (PROMs) for the pilot RCT. We would also like to thank the Heart  
7  
8 and Stroke Foundation for supporting HEARTPA♀N and working together to share the findings  
9  
10 and the products generated from our work. The Women's Xchange will provide ongoing sex and  
11  
12 gender consultative support throughout the project, opportunities for trainees to learn more about  
13  
14 sex and gender integration in health research, and also assist with knowledge translation and  
15  
16 exchange.  
17  
18

19  
20 **Contributors** The PI (Parry) and Co-PI (Clarke) conceived the study. Co-PIs (Bjørnnes,  
21  
22 Cafazzo, Cooper, Dhukai, Harvey, Katz, Laloo, Leegaard, Légaré, McFetridge-Durdle,  
23  
24 McGillion, Norris, Patterson, Pilote, Pink, Price, Stinson, Victor, Watt-Watson, Auld, Faubert, D  
25  
26 Park, M Park, Rickard, Spiteri DeBonis) contributed to the study design and are assisting with  
27  
28 study implementation across Phases 2A, 2B and 3. All authors are grant holders except our  
29  
30 Human Factors Designers: Lovas, Parent and Uddin. Our Human Factors Designers (Lovas,  
31  
32 Parente and Uddin) are involved in Phases 2A/2B (HEARTPA♀N content and core feature-  
33  
34 set/usability testing) and have contributed to writing these components of the manuscript.  
35  
36 Cafazzo, Laloo and Stinson provided methodological expertise on mobile device functionality  
37  
38 and the sequential phased approach to developing the HEARTPA♀N application. Leegaard,  
39  
40 Bjørnnes and Victor provided methodological expertise: Leegaard and Bjørnnes will lead all  
41  
42 qualitative analyses and Victor will lead the primary statistical analysis of the pilot RCT. Seven  
43  
44 women (Cooper, Auld, Faubert, D Park, M Park, Rickard, Spiteri DeBonis) with cardiac pain  
45  
46 formed the HEARTPA♀N PAC and are Co-PIs. Harvey, Légaré, Norris, Price and Pilote will  
47  
48 inform and assist to validate our triage algorithms. All other authors will assist to build and/or  
49  
50 approve content for the HEARTPA♀N application (Parry, Clarke, Dhukai, Katz, McFetridge-  
51  
52  
53  
54  
55  
56  
57  
58  
59  
60

1  
2 Durdle, McGillion, Patterson, Pink, Watt-Watson). All authors approved the final manuscript  
3  
4 prior to submission and are accountable for all aspects in ensuring accuracy and integrity of work  
5  
6 across all phases of the study.  
7

8  
9 **Funding** This work was supported by a Canadian Institutes of Health Research (CIHR) Project  
10  
11 Grant Fall 2017 competition (389044), Ottawa, Ontario, Canada.  
12

13  
14 **Competing interests** None declared.  
15

16  
17 **Supplemental material.** Model consent form.  
18  
19  
20  
21  
22  
23  
24  
25  
26  
27  
28  
29  
30  
31  
32  
33  
34  
35  
36  
37  
38  
39  
40  
41  
42  
43  
44  
45  
46  
47  
48  
49  
50  
51  
52  
53  
54  
55  
56  
57  
58  
59  
60

## REFERENCES

1. Johnston N, Schenck-Gustafsson K, Lagerqvist B. Are we using cardiovascular medications and coronary angiography appropriately in men and women with chest pain? *European Heart Journal*. 2011;32(11):1331-1336.
2. Qureshi W, Blaha M, Nasir K, al-Mallah M. Gender differences in coronary plaque composition and burden detected in symptomatic patients referred for coronary computed tomographic angiography. *Int J Card Imaging*. 2013;29(2):463-469.
3. Kok M, van der Heijden L, Sen H, et al. Sex differences in chest pain after implantation of newer generation coronary drug-eluting stents: A patient-level pooled analysis from the TWENTE and DUTCH PEERS trials. *JACC Cardiovascular Interventions*. 2016;9(6):553-561.
4. Parry M, Watt-Watson J, Hodnett E, Tranmer J, Dennis C, Brooks D. Pain Experiences of Men and Women after Coronary Artery Bypass Graft Surgery. *Journal of Cardiovascular Nursing*. 2010;25(3):E9-15.
5. King KM, Parry M, Southern D, Faris P, Tsuyuki RT. Women's Recovery from Sternotomy-Extension (WREST-E) study: examining long-term pain and discomfort following sternotomy and their predictors. *Heart*. 2008;94(4):493-497.
6. Bjørnnes A, Parry M, Lie I, et al. Pain experiences of men and women after cardiac surgery. *Journal of Clinical Nursing*. 2016.
7. Choiniere M, Watt-Watson J, Victor J, et al. Prevalence of and risk factors for persistent postoperative nonanginal pain after cardiac surgery: a 2-year prospective multicentre study. *CMAJ*. 2014;186(7):e213-e223.
8. Bordoni B, Marelli F, Morabito B, Sacconi B, Severino P. Post-sternotomy pain syndrome following cardiac surgery: case report. *J Pain Res*. 2017;10:1163-1169.

- 1  
2 9. Agrawal S, Mehta P, Bairey C. Cardiac Syndrome X-Update 2014. *Cardiology Clinics*.  
3  
4 2014;32(3):463-478.  
5
- 6  
7 10. Tamis-Holland J, Jneid H, Reynolds H, et al. Contemporary Diagnosis and Management  
8  
9 of Patients with Myocardial Infarction in the Absence of Obstructive Coronary Artery  
10  
11 Disease. *Circulation*. 2019;139:e891-e908.  
12
- 13  
14 11. Thygesen K, Alpert J, Jaffe A, et al. Fourth Universal Definition of Myocardial Infarction  
15  
16 (2018). *Journal of the American College of Cardiology*. 2018;72(18):2231-2264.  
17
- 18  
19 12. Wei J, Cheng S, Bairey Merz C. Coronary microvascular dysfunction causing cardiac  
20  
21 ischemia in women. *JAMA*. 2019;322(23):2334-2335.  
22
- 23  
24 13. Pepine C, Ferdinand K, Shaw L, et al. Emergence of Nonobstructive Coronary Artery  
25  
26 Disease: A Woman's Problem and Need for Change in Definition on Angiography.  
27  
28 *Journal of the American College of Cardiology*. 2015;66(17):1918-1933.  
29
- 30  
31 14. CDC. *Health, United States, 2011 With a Special Feature on Socioeconomic Status and*  
32  
33 *Health*. National Center for Health Statistics;2011.  
34
- 35  
36 15. Ferry A, Anand A, Strachan F, et al. Presenting symptoms in men and women diagnosed  
37  
38 with myocardial infarction using sex-specific criteria. *J Am Heart Assoc*. 2019;8.  
39
- 40  
41 16. Mehta I, Beckie T, DeVon H, et al. Acute myocardial infarction in women: a scientific  
42  
43 statement from the American Heart Association. *Circulation*. 2016;133:1-32.  
44
- 45  
46 17. Parry M, Watt-Watson J, Hodnett E, Tranmer J, Dennis C, Brooks D. Pain experiences of  
47  
48 men and women after coronary artery bypass graft surgery. *Journal of Cardiovascular*  
49  
50 *Nursing*. 2010;25(3):E9-E15.  
51
- 52  
53 18. Canto J, Canto E, Goldberg R. Time to standardize and broaden the criteria of acute  
54  
55 coronary symptoms presentations in women. *Canadian Journal of Cardiology*.  
56  
57 2014;30:721-728.  
58  
59

- 1  
2 19. Kirchberger I, Heier M, Wende R, von Scheidt W, Meisinger C. The patient's  
3  
4 interpretation of myocardial infarction symptoms and its role in the decision process to  
5  
6 seek treatment: the MONICA/KORA Myocardial Infarction Registry. *Clin Res Cardiol.*  
7  
8 2012;101:909-916.  
9
- 10  
11 20. Sjostrom-Strand A, Fridlund B. Women's descriptions of symptoms and delay reasons in  
12  
13 seeking medical care at the time of a first myocardial infarction: A qualitative study.  
14  
15 *International Journal of Nursing Studies.* 2008;45:1003-1010.  
16
- 17  
18 21. von Eisenhart Rothe A, Albarqouni L, Gartner C, Walz L, Smenes K, Ladwig K. Sex  
19  
20 specific impact of prodromal chest pain on pre-hospital delay time during an acute  
21  
22 myocardial infarction: Findings from the multicenter MEDEA Study with 619 STEMI  
23  
24 patients. *International Journal of Cardiology.* 2015;201:581-586.  
25
- 26  
27 22. Sabbag A, Matetzky S, Gottlieb S, et al. Recent temporal trends in the presentation,  
28  
29 management, and outcome of women hospitalized with acute coronary syndromes. *The*  
30  
31 *American Journal of Medicine.* 2015;128(4):380-388.  
32
- 33  
34 23. Arthur H, Campbell P, Harvey P, et al. Women, Cardiac Syndrome X, and Microvascular  
35  
36 Heart Disease. *Canadian Journal of Cardiology.* 2012;28:S42-S49.  
37
- 38  
39 24. Altintas E, Yigit F, Taskintuna N. The impact of psychiatric disorders with cardiac  
40  
41 syndrome X on quality of life: 3 months prospective study. *International Journal of*  
42  
43 *Clinical and Experimental Medicine.* 2014;7(10):3520-3527.  
44
- 45  
46 25. Pacheco C, Bairey Merz C. Women in Cardiovascular Clinical Trials - What are the  
47  
48 Barriers to Address to Improve Enrollment? *Canadian Journal of Cardiology.*  
49  
50 2019;35:552-554.  
51
- 52  
53 26. Kuehn B. Boosting Women's Participation in Cardiovascular Trials. *Circulation.*  
54  
55 2018;138(1366-1367).  
56  
57  
58  
59



- 1  
2 27. Parry M, Bjornnes A, Clarke H, et al. Self-management of cardiac pain in womne: an  
3  
4 evidence map. *BMJ Open*. 2017;7.  
5  
6 28. Lorig K, Holman H. Self-management education: history, definition, outcomes, and  
7  
8 mechanisms. *Annals of Behavioral Medicine*. 2003;26(1):1-7.  
9  
10 29. Bandura A. Self-efficacy: Toward a unifying theory of behavioral change. *Psychological*  
11  
12 *Review*. 1977;84(2):191-215.  
13  
14 30. Johnston L, Foster M, Shennan J, Starkey N, Johnson A. The effectiveness of an  
15  
16 acceptance and commitment therapy self-help intervention for chronic pain. *Clinical*  
17  
18 *Journal of Pain*. 2010;26(5):393-402.  
19  
20 31. Mcgillion M, Arthur H, Victor J, Watt-Watson J, Cosman T. Effectiveness of  
21  
22 psychoeducational interventions for improving symptoms, health-related quality of life,  
23  
24 and psychological well being in patients with stable angina. *Current Cardiology Reviews*.  
25  
26 2008;4:1-11.  
27  
28 32. Perry K, Nicholas M, Middleton J. Multidisciplinary cognitive behavioural pain  
29  
30 management programmes for people with a spinal cord injury: design and  
31  
32 implementation. *Disability Rehabilitation Journal*. 2011;33(13):1272-1280.  
33  
34 33. Naylor M, Keefe F, Brigidi B, Naud S, Helzer J. Therapeutic interactive voice response  
35  
36 for chronic pain reduction and relapse prevention. *Pain*. 2008;134(3):335-345.  
37  
38 34. Dysvik E, Kvaley J, Stokkeland R, Natvig G. The effectiveness of a multidisciplinary  
39  
40 pain management programme managing chronic pain on pain perceptions, health-related  
41  
42 quality of life and stages of change - a non-randomized controlled study. *International*  
43  
44 *Journal of Nursing Studies*. 2010;47(7):826-835.  
45  
46  
47  
48  
49  
50  
51  
52  
53  
54  
55  
56  
57  
58  
59  
60

- 1  
2 35. Glombiewski J, Hartwich-Tersek J, Rief W. Two psychological interventions are effective  
3  
4 in severely disabled, chronic back pain patients: a randomized controlled trial.  
5  
6 *International Journal of Behavioral Medicine*. 2010;17(2):97-107.  
7  
8  
9 36. Parry M, Bjornnes A, Victor J, et al. Self-management interventions for women with  
10  
11 cardiac pain: A systematic review and meta-analysis. *Canadian Journal of Cardiology*.  
12  
13 2018;34:458-467.  
14  
15  
16 37. Knight-Agarwal C, Davis D, Williams L, Davey R, Cox R, Clark A. Development and  
17  
18 pilot testing of the eating4two mobile phone app to monitor gestational weight gain. *JMIR*  
19  
20 *Mhealth Uhealth*. 2015;3(2):e44.  
21  
22  
23 38. Willcox J, Campbell K, McCarthy E, et al. Testing the feasibility of a mobile technology  
24  
25 intervention promoting healthy gestational weight gain in pregnant women (txt4two)-  
26  
27 study protocol for a randomised controlled trial. *Trials*. 2015;16:1-8.  
28  
29  
30 39. Waring M, Moore Simas T, Xiao R, et al. Pregnant women's interest in a website or  
31  
32 mobile application for healthy gestational weight gain. *Sexual & Reproductive*  
33  
34 *HealthCare*. 2014;5(4):182-184.  
35  
36  
37 40. Fukuoka Y, Komatsu J, Suarez L, et al. The mPED randomized controlled clinical trial:  
38  
39 applying mobile persuasive technologies to increase physical activity in sedentary women  
40  
41 protocol. *BMC Public Health*. 2011;11:1-8.  
42  
43  
44 41. Thomas J, Wing R. Health-e-call, a smartphone-assisted behavioral obesity treatment:  
45  
46 pilot study. *JMIR Mhealth Uhealth*. 2013;1(1):e3.  
47  
48  
49 42. Llanos A, Krok J, Peng J, et al. Effects of a walking intervention using mobile technology  
50  
51 and interactive voice response on serum adipokines among postmenopausal women at  
52  
53 increased breast cancer risk. *Hormones and Cancer*. 2014;5(2):98-103.  
54  
55  
56  
57  
58  
59  
60

- 1  
2 43. Wen K, Miller S, Kilby L, et al. Preventing postpartum smoking relapse among inner city  
3 women: development of a theory-based and evidence-guided text messaging intervention.  
4  
5  
6 *JMIR Research Protocols*. 2014;3(2):e20.  
7  
8  
9 44. Licskai C, Sands T, Ferrone M. Development and pilot testing of a mobile health solution  
10 for asthma self-management: asthma action plan smartphone application pilot study.  
11  
12 *Canadian Respiratory Journal*. 2013;20(4):301-306.  
13  
14  
15 45. CATALYST. Smartphone behaviour in Canada and the implications for marketers in  
16 2016. <http://catalyst.ca/2016-canadian-smartphone-behaviour/>. Published 2016. Accessed.  
17  
18  
19  
20 46. Life in the fast lane: How are Canadians managing?  
21  
22 <https://www150.statcan.gc.ca/n1/daily-quotidien/171114/dq171114a-eng.htm?HPA=1>.  
23  
24 Published 2017. Accessed December 20, 2019.  
25  
26  
27 47. Silow-Carroll S, Smith B. Clinical management apps: Creating partnerships between  
28 providers and patients. 2013;30:1-10.  
29  
30  
31 48. Fawcett J, Watson J, Neuman B, Walker PH, Fitzpatrick JJ. On Nursing Theories and  
32 Evidence *Journal of Nursing Scholarship*. 2001;33(2):115-119.  
33  
34  
35  
36 49. Ryan P, Sawin KJ. The Individual and Family Self-Management Theory: Background and  
37 Perspectives on Context, Process, and Outcomes. *Nurs Outlook*. 2009;57(4):217-225.  
38  
39  
40  
41 50. Danaher B, Brendryen H, Seeley J, Tyler M, Woolley T. From black box to toolbox:  
42 Outlining device functionality, engagement activities, and the pervasive information  
43 architecture of mHealth interventions. *Internet Interventions*. 2014;2:91-101.  
44  
45  
46  
47  
48 51. Craig P, Dieppe P, Macintyre S, Michie S, Nazareth I, Petticrew M. Developing and  
49 evaluation complex interventions: the new Medical Research Council guidance. *BMJ*.  
50 2008;337:1-6.  
51  
52  
53  
54  
55  
56  
57  
58  
59  
60

- 1  
2 52. MRC. *A Framework for Development and Evaluation of RCTs fro Complex Interventions*  
3 *to Improve Health*. 2000.  
4  
5  
6 53. Campbell MK, Fitzpatrick R, Haines A, et al. Framework for design and evaluation of  
7 complex interventions to improve health. *British Medical Journal*. 2000;321:694-696.  
8  
9  
10 54. Danaher B, Seeley J. Methodological issues in research on Web-based behavioral  
11 interventions. *Annals of Behavioral Medicine*. 2009;38:28-39.  
12  
13  
14 55. Holzinger A. Usability engineering methods for software developers. *Communications of*  
15 *the ACM*. 2005;48(1):71-74.  
16  
17  
18 56. Callahan C, Unverzagt F, Hui S, Perkins A, Hendrie H. Six-Item Screener to Identify  
19 Cognitive Impairment Among Potential Subjects for Clinical Research. *Medical Care*.  
20 2002;40(9):771-781.  
21  
22  
23 57. Carpenter C, DesPain B, Keeling T, Shah M, Rothenberger M. The Six-Item Screener and  
24 SD8 for the Detection of Cognitive Impairment in Geriatric Emergency Department  
25 Patients. *Ann Emerg Med*. 2011;57(6):653-661.  
26  
27  
28 58. Kvale S, Brinkmann S. *Interviews: Learning the craft of qualitative interviewing*. Los  
29 Angeles: Sage; 2015.  
30  
31  
32 59. DiCicco-Bloom B, Crabtree B. The Qualitative Research Interview. *Medical Education*.  
33 2006;40:314-321.  
34  
35  
36 60. Jibb L, Stevens B, Nathan P, Cafazzo J, Stinson J. A smartphone-based pain management  
37 app for adolescents with cancer: Establishing system requirements and a pain care  
38 algorithm based on literature review, interviews, and consensus. *JMIR Research*  
39 *Protocols*. 2014;3(1):e15.  
40  
41  
42  
43  
44  
45  
46  
47  
48  
49  
50  
51  
52  
53  
54  
55  
56  
57  
58  
59  
60

- 1  
2 61. Stinson J, Gupta A, Dupuis F, et al. Usability testing of an online self-management  
3  
4 program for adolescents with cancer. *Journal of Pediatric Oncology Nursing*.  
5  
6 2014;32(2):70-82.  
7  
8  
9 62. Breakey V, Warias A, Ignas D, White M, Blanchette V, Stinson J. The value of usability  
10  
11 testing for Internet-based adolescent self-management interventions: "Managing  
12  
13 Hemophilia Online". *BMC Medical Informatics and Decision Making*. 2013;13:113.  
14  
15  
16 63. Macefield R. How to specify the participant group size for usability studies: A  
17  
18 practitioner's guide. *Journal of Usability Studies*. 2009;5:34-45.  
19  
20  
21 64. Nielsen J, Landauer T. A Mathematical Model of the Finding of Usability Problems.  
22  
23 Paper presented at: Proceedings of ACM INTERCHI'93 Conference; 24-29 April 1993,  
24  
25 1993; Amsterdam, The Netherlands.  
26  
27  
28 65. Jaspers M. A comparison of usability methods for testing interactive health technologies:  
29  
30 Methodological aspects and empirical evidence. *Int J Med Inf*. 2009;78(5):340-353.  
31  
32  
33 66. Brooke J. A "quick and dirty" usability scale. In: Jordan P, Thomas B, Weerdmeester B,  
34  
35 McClelland I, eds. *Usability evaluation in industry*. London: Taylor & Francis; 1996.  
36  
37  
38 67. Bangor A, Kortum PT, Miller JT. An Empirical Evaluation of the System Usability Scale.  
39  
40 *International Journal of Human-Computer Interaction*. 2008;24(6):574-594.  
41  
42  
43 68. Kushniruk A. Evaluation in the design of health information systems: application of  
44  
45 approaches emerging from usability engineering. *Computers in Biology and Medicine*.  
46  
47 2002;32:141-149.  
48  
49  
50 69. Biørn-Hansen A, Majchrzak T, Grønli T. Progressive Web Apps: The possible web-native  
51  
52 unifier for mobile development. Paper presented at: Proceedings of the 13th International  
53  
54 Conference on Web Information Systems and Technologies (WEBIST 2017)2017.  
55  
56  
57  
58  
59

- 1  
2 70. Majchrzak T, Biørn-Hansen A, Grønli T. Progressive Web Apps: the Definite Approach  
3 to Cross-Platform Development. Paper presented at: Proceedings of the 51st Hawaii  
4 International Conference on System Sciences 2018.  
5  
6  
7  
8  
9 71. Malavolta I. Beyond native apps: Web technologies to the rescue! . Paper presented at:  
10 Mobile! '16 2016; Amsterdam, Netherlands.  
11  
12  
13 72. Cotugna N, Vickery C, Carpentier-Haefele K. Evaluation of literacy level of patient  
14 education pages in health-related journals. *Journal of Community Health*.  
15 2005;30(3):213-219.  
16  
17  
18  
19  
20 73. Parry M, Watt-Watson J, Hodnett E, Tranmer J, Dennis C-L, Brooks D. Cardiac Home  
21 Education and Support Trial (CHEST): A pilot study. *Canadian Journal of Cardiology*.  
22 2009;25(12):e393-e398.  
23  
24  
25  
26  
27 74. Suresh K. An overview of randomization techniques: An unbiased assessment of outcome  
28 in clinical research. *J Hum Reprod*. 2011;4(1):8-11.  
29  
30  
31  
32 75. Kernan W, Viscoli C, Makuch R, Brass L, Horwitz R. Stratified Randomization for  
33 Clinical Trials. *Journal of Clinical Epidemiology*. 1999;52(1):19-26.  
34  
35  
36  
37 76. Tariman J, Berry D, Halpenny B, Wolpin S, Schepp K. Validation and testing of the  
38 Acceptability E-scale for web-based patient-reported outcomes in cancer care. *Applied*  
39 *Nursing Research*. 2011;24(1):53-58.  
40  
41  
42  
43 77. McDowell I, Newell C. *Measuring health: A guide to rating scales and questionnaires*.  
44 Vol 2nd ed. New York: Oxford University Press; 1996.  
45  
46  
47  
48 78. Watt-Watson J, Stevens B, Katz J, Costello J, Reid G, David T. Impact of preoperative  
49 education on pain outcomes after coronary artery bypass graft surgery. *Pain*.  
50 2004;109:73-85.  
51  
52  
53  
54  
55  
56  
57  
58  
59  
60

- 1  
2 79. Watt-Watson J, Stevens B, Costello J, Katz J, Reid G. Impact of preoperative education  
3  
4 on pain management outcomes after coronary artery bypass graft surgery. *Canadian*  
5  
6 *Journal of Nursing Research*. 2000;31:41-56.  
7  
8  
9 80. Ware J, Kosinski M, Dewey J. How to score Version 2 of the SF-36 Health Survey: A  
10  
11 User's Manual. In. Boston: The Health Institute, New England Medical Center; 2002.  
12  
13 81. Irvine D, O'Brien-Pallas L, Murray M, et al. The reliability and validity of two health  
14  
15 status measures for evaluation outcomes of home care nursing. *Research in Nursing &*  
16  
17 *Health*. 2000;23:43-54.  
18  
19  
20 82. Ware J. SF-36 Health Survey: Manual and Interpretation Guide. In. Boston: New  
21  
22 England Medical Center, The Health Institute; 1993.  
23  
24 83. Thabane L, Ma J, Chu R, et al. A tutorial on pilot studies: the what, why and how. *BMC*  
25  
26 *Medical Research Methodology*. 2010;10.  
27  
28  
29 84. Mathias S, Crosby R, Qian Y, Jiang QW, Dansey R, Chung K. Estimating minimally  
30  
31 important differences for the worst pain rating of the Brief Pain Inventory-Short Form. *J*  
32  
33 *Support Oncol*. 2011;9(2):72-78.  
34  
35  
36  
37  
38  
39  
40  
41  
42  
43  
44  
45  
46  
47  
48  
49  
50  
51  
52  
53  
54  
55  
56  
57  
58  
59  
60

1  
2 **FIGURE LEGEND**  
3

4 **Figure 1** Anticipated participant flow through in pilot RCT.  
5  
6  
7  
8  
9  
10  
11  
12  
13  
14  
15  
16  
17  
18  
19  
20  
21  
22  
23  
24  
25  
26  
27  
28  
29  
30  
31  
32  
33  
34  
35  
36  
37  
38  
39  
40  
41  
42  
43  
44  
45  
46  
47  
48  
49  
50  
51  
52  
53  
54  
55  
56  
57  
58  
59  
60

For peer review only



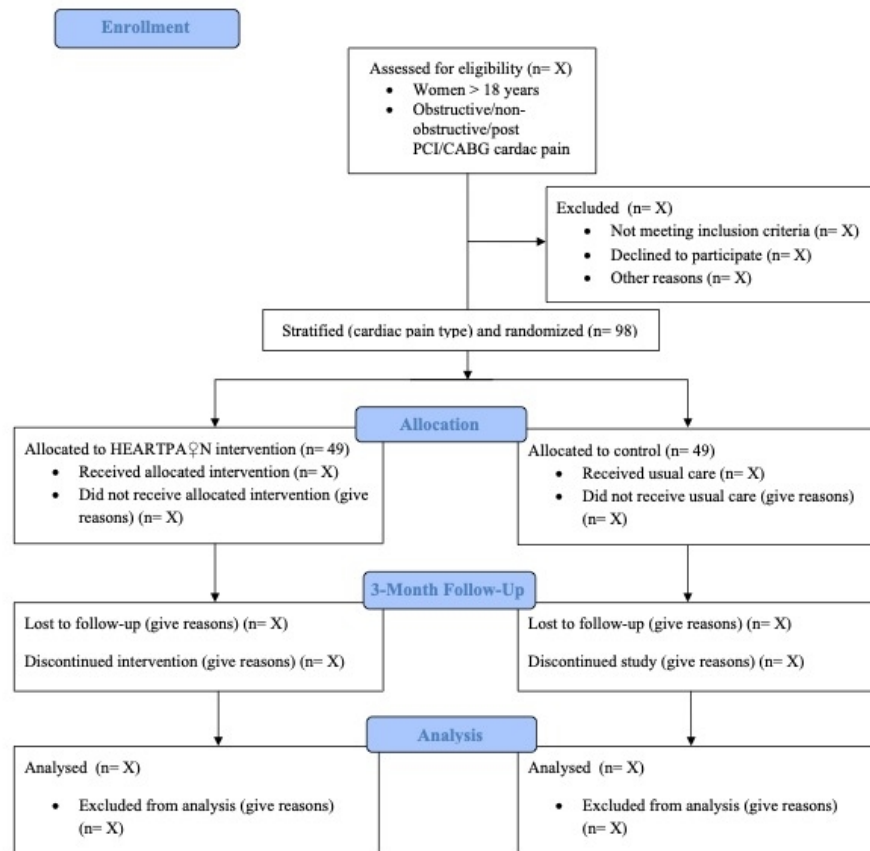

Figure 1 Anticipated participant flow through in pilot RCT.

215x279mm (72 x 72 DPI)

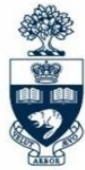

**BLOOMBERG**  
LAWRENCE S. BLOOMBERG  
FACULTY OF NURSING  
UNIVERSITY OF TORONTO

**Participant Information and Consent Form**  
**Study 1**

---

**Principal Investigator:**

**Dr. Monica Parry, Lawrence S. Bloomberg Faculty of Nursing, University of Toronto**

**Phone: (416) 946 – 3561**

**Email: women.heartpain@utoronto.ca**

---

**Co-Investigators:**

Dr. Hance Clarke - University Health Network  
Dr. Ann Kristin Bjørnnes – Oslo Metropolitan University  
Dr. Joseph Cafazzo – University Health Network  
Ms. Abida Dhukai – University of Toronto  
Dr. Paula Harvey – Women’s College Hospital  
Dr. Joel Katz – York University  
Dr. Chitra Lalloo – Hospital for Sick Children  
Dr. Marit Leegaard – Oslo Metropolitan University  
Dr. France Légaré - Université Laval  
Dr. Judith McFetridge-Durdle – Florida State University  
Dr. Michael McGillion – McMaster University  
Dr. Colleen Norris – University of Alberta  
Ms. Rose Patterson – Anishnawbe Health Toronto  
Dr. Louise Pilote – Research Institute of the McGill University Health Centre  
Ms. Leah Pink – Sinai Health System  
Dr. Jennifer Price – Women’s College Hospital  
Dr. Jennifer Stinson – Hospital for Sick Children  
Mr. J. Charles Victor – University of Toronto  
Dr. Judy Watt-Watson – Lawrence S. Bloomberg Faculty of Nursing  
Ms. Carol Auld – Patient Advisor  
Ms. Lynn Cooper – Patient Advisor  
Ms. Christine Faubert – Patient Advisor  
Ms. Deborah Park – Patient Advisor  
Ms. Marianne Park – Patient Advisor  
Ms. Beatrice Rickard – Patient Advisor  
Ms. Vincenza Spiteri DeBonis – Patient Advisor

**Title of Project:** Development and Usability Testing of HEARTPAIN: An Integrated Smartphone and Web-Based Intervention for Women with Cardiac Pain

**Purpose and Background**

More women die of coronary artery disease (CAD) than cancer, chronic lower respiratory disease, Alzheimer’s disease, and accidents combined. Coronary artery disease is also the leading cause of death of women across all ages, and recent data show an increase in CAD incidence and deaths in

women younger than 55 years of age. Women with CAD have cardiac pain that differs from that of men. The overall goal of this program of research is to develop and assess a HEARTPAIN app and website that will help women self-manage cardiac pain. Feedback from women is a necessary step to designing HEARTPAIN.

### **Procedures**

If I agree to participate in this study, I understand that the following things will happen:

1. I will be asked to complete a baseline demographic form describing my age, education, employment, type and duration of cardiac pain etc. To protect my privacy and confidentiality, I will have a study ID number instead of my name on the form.
2. I will participate in a discussion group session (face-to-face or by free video/web conferencing) for approximately one hour that may involve 4 to 9 other women who have cardiac pain. Their cardiac pain may be similar or different from the cardiac pain that I experience. The session will be audiotaped and to protect my privacy and anonymity, my last name will not be used. All audio and transcribed files will be kept on the secure server at Bloomberg Nursing and only the PI (Parry) and Project Coordinator (Leyden) will have access to the password-protected server. Study data will be kept for seven years and then destroyed.
3. I understand that I can volunteer to participate in the 2-day consensus conference.
4. I understand that I can volunteer to participate in future studies as HEARTPAIN is developed/tested.

### **Potential Benefits**

I understand that by participating in this study that there may be no direct benefits. However, I understand that by participating in this study I may have a better understanding of my cardiac pain. I may also become more aware of cardiac pain in other women.

I understand that I can get a plain language summary of the study results by checking the box below:

- I would like a copy of a plain language summary of the study results sent to me in an email link.

### **Potential Risks**

I understand that there are no known risks to participating in this study. If I find that the discussion group upsets me, I can discuss this with the researchers who are conducting this study. I can have the option of a one-to-one telephone interview.

If you experience medical distress during a discussion group session, we ask that you let the facilitator know about your distress and medical attention will be sought.

### **Cost**

I understand that there is no charge for participating in this study. I may incur transportation and/or parking costs and these will be reimbursed as outlined in the financial compensation section.

### **Financial Compensation**

I understand that if I need to travel within the GTA to participate in a discussion group my transportation costs will be reimbursed (e.g., TTC tokens, parking), in accordance with University of

1  
2 Toronto's reimbursement to participant guidelines. I also understand if I attend the 2-day consensus  
3 conference that my transportation costs will be covered (e.g., TTC tokens, parking, economy travel), in  
4 accordance with University of Toronto's reimbursement to participant guidelines. [Participant  
5 guidelines for study reimbursements: [http://www.research.utoronto.ca/policies-and-  
6 procedures/compensation-and-reimbursement-of-research-participants/](http://www.research.utoronto.ca/policies-and-procedures/compensation-and-reimbursement-of-research-participants/)]. Original receipts and/or paid  
7 invoices will be required before payment is provided.  
8  
9

### 10 **Confidentiality**

11 I understand that information about specific individuals in this study will be kept strictly confidential  
12 and will not be available to anyone except the Principal Investigator (PI) and members of the  
13 investigative team. Only an identification number will appear on the demographic questionnaires, and  
14 therefore my responses will remain anonymous. One copy of my name and my study identification  
15 number will be kept in a locked drawer in the researcher's office. No one but Dr. Parry and the Project  
16 Coordinator will have access to the file. All information obtained in this study will be used for research  
17 purposes only. I will be able to access the results of the study from the PI when it is complete.  
18 I understand that if I participate in a discussion group, my anonymity will be preserved through the use  
19 of my first name only.  
20  
21

22  
23 I understand that if I participate in a discussion group, my anonymity will be preserved through the use  
24 of my first name only.  
25

26 I understand that I must respect the privacy and confidentiality of other study participants. The names  
27 of others involved in this study, and any personal information discussed during the group session are to  
28 be kept strictly confidential.  
29

30  
31 The research study with which you are participating may be reviewed for quality assurance to ensure  
32 that required laws and guidelines are followed. If chosen, representatives of the Human Research  
33 Ethics Program (HREP), may access study related data and/or consent materials as part of their review.  
34 All information accessed by the HREP will be upheld to the same standard of confidentiality that has  
35 been stated by the research team.  
36  
37

### 38 **Right to Refuse or Withdraw**

39 I understand that my participation in this study is entirely voluntary and I am free to refuse to take part  
40 in the discussion group or to withdraw at any time prior to the discussion group without penalty. During  
41 the discussion group, I also understand that I can choose not to answer any given question without  
42 penalty. I understand if I withdraw from the study that my data will only be withdrawn if I explicitly  
43 request this to be done. I also understand that during and after the discussion groups, it will not be  
44 possible for me to withdraw my data from the study.  
45  
46

### 47 **Contact**

48 **I understand that if I have any questions about the study, I can contact Dr. Monica Parry at 416-  
49 946-3561 (Principal Investigator).** I understand that if I have questions about my rights as a research  
50 participant, I can contact the University of Toronto, Office of Research Ethics at  
51 [ethics.review@utoronto.ca](mailto:ethics.review@utoronto.ca) or 416-946-3273. I may keep this copy of the information and consent letter  
52 for my own reference.  
53  
54

### 55 **SUBJECT STATEMENT AND SIGNATURE SECTION**

56 I have read and understand the consent form for this study. I have had the purposes, procedures and  
57

1  
2 technical language of this study explained to me. I have been given enough time to consider the above  
3 information and to seek advice if I chose to do so. I have had the opportunity to ask questions which  
4 have been answered to my satisfaction. I am voluntarily signing this form.  
5  
6

7 \_\_\_\_\_  
8 (Signature of participant)

\_\_\_\_\_ (Date)

9  
10 **STATEMENT OF INVESTIGATOR AND SIGNATURE SECTION**

11 I, or one of my colleagues, have carefully explained to the subject the nature of the above research  
12 study. I certify that, to the best of my knowledge, the subject understands clearly the nature of the study  
13 and demands, benefits, and risks involved to subjects in this study.  
14  
15

16 \_\_\_\_\_  
17 (Signature of study personnel)

\_\_\_\_\_ (Date)

18  
19  
20  
21  
22  
23  
24  
25  
26  
27  
28  
29  
30  
31  
32  
33  
34  
35  
36  
37  
38  
39  
40  
41  
42  
43  
44  
45  
46  
47  
48  
49  
50  
51  
52  
53  
54  
55  
56  
57

For peer review only

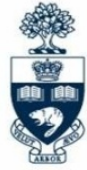

**BLOOMBERG**  
LAWRENCE S. BLOOMBERG  
FACULTY OF NURSING  
UNIVERSITY OF TORONTO

**Health Care Provider Information and Consent Form  
Study 1**

**Principal Investigator:**

**Dr. Monica Parry, Lawrence S. Bloomberg Faculty of Nursing, University of Toronto**

**Phone: (416) 946 – 3561**

**Email: [women.heartpain@utoronto.ca](mailto:women.heartpain@utoronto.ca)**

**Co-Investigators:**

Dr. Hance Clarke - University Health Network  
Dr. Ann Kristin Bjørnnes – Oslo Metropolitan University  
Dr. Joseph Cafazzo – University Health Network  
Ms. Abida Dhukai – University of Toronto  
Dr. Paula Harvey – Women’s College Hospital  
Dr. Joel Katz – York University  
Dr. Chitra Laloo – Hospital for Sick Children  
Dr. Marit Leegaard – Oslo Metropolitan University  
Dr. France Légaré - Université Laval  
Dr. Judith McFetridge-Durdle – Florida State University  
Dr. Michael McGillion – McMaster University  
Dr. Colleen Norris – University of Alberta  
Ms. Rose Patterson – Anishnawbe Health Toronto  
Dr. Louise Pilote – Research Institute of the McGill University Health Centre  
Ms. Leah Pink – Sinai Health System  
Dr. Jennifer Price – Women’s College Hospital  
Dr. Jennifer Stinson – Hospital for Sick Children  
Mr. J. Charles Victor – University of Toronto  
Dr. Judy Watt-Watson – Lawrence S. Bloomberg Faculty of Nursing  
Ms. Carol Auld – Patient Advisor  
Ms. Lynn Cooper – Patient Advisor  
Ms. Christine Faubert – Patient Advisor  
Ms. Deborah Park – Patient Advisor  
Ms. Marianne Park – Patient Advisor  
Ms. Beatrice Rickard – Patient Advisor  
Ms. Vincenza Spiteri DeBonis – Patient Advisor

**Title of Project:** Development and Usability Testing of HEARTPAIN: An Integrated Smartphone and Web-Based Intervention for Women with Cardiac Pain

**Purpose and Background**

More women die of coronary artery disease (CAD) than cancer, chronic lower respiratory disease, Alzheimer’s disease, and accidents combined. Coronary artery disease is also the leading cause of

1  
2 death of women across all ages, and recent data show an increase in CAD incidence and deaths in  
3 women younger than 55 years of age. Women with CAD have cardiac pain that differs from that of  
4 men. The overall goal of this program of research is to develop and assess a HEARTPAIN app and  
5 website that will help women self-manage cardiac pain. Feedback from health care providers is a  
6 necessary step to designing HEARTPAIN.  
7

## 8 **Procedures**

9 If I agree to participate in this study, I understand that the following things will happen:

- 10  
11  
12 1. I will be asked to complete a baseline demographic form describing my age, education, and  
13 employment etc. To protect my privacy and confidentiality, I will have a study ID number instead of  
14 my name on the form.  
15  
16  
17 2. I will participate in an interview session for approximately one hour, which may involve other health  
18 care providers who manage women who have cardiac pain. In this session I will be asked to describe  
19 the women I see with cardiac pain symptoms, and how I assess, manage and make decisions about their  
20 symptoms. The session will be audiotaped and to protect my privacy and anonymity, my last name will  
21 not be used.  
22  
23  
24 3. I understand that I can volunteer to participate in the 2-day consensus conference.  
25  
26 4. I understand that I can volunteer to participate in future studies as HEARTPAIN is developed/tested.  
27

## 28 **Potential Benefits**

29 I understand that by participating in this study I may have a better understanding of how others assess,  
30 manage and make decisions about cardiac pain in women. I may also become more aware of cardiac  
31 pain and cardiac pain symptoms in women.  
32  
33

34 I understand that by participating in this study that there may be no direct benefits. However, I may  
35 have a better understanding of how others assess, manage, and make decisions about cardiac pain in  
36 women. I may also become more aware of cardiac pain and cardiac pain symptoms in women.  
37  
38

39 I understand that I can get a plain language summary of the study results by checking the box  
40 below:

- 41  
42  I would like a copy of a plain language summary of the study results sent to me in an email link.  
43  
44

## 45 **Potential Risks**

46 I understand that there are no known risks to participating in this study. However, there may be  
47 unforeseeable risks. If I find that the focus group is difficult for me to attend, I can discuss this with the  
48 researchers who are conducting this study. I can have the option of a one-to-one telephone interview.  
49  
50

## 51 **Cost**

52 I understand that there is no charge for participating in this study.  
53  
54

## 55 **Financial Compensation**

56 I understand there is no financial compensation provided for participation in this study.  
57

### Confidentiality

I understand that information about specific individuals in this study will be kept strictly confidential and will not be available to anyone except the Principal Investigator (PI) and members of the investigative team. Only an identification number will appear on the demographic questionnaires, and therefore my responses will remain anonymous. One copy of my name and my study identification number will be kept in a locked drawer in the researcher's office. No one but Dr. Parry and the Project Coordinator will have access to the file. All information obtained in this study will be used for research purposes only. I will be able to access the results of the study from the PI when it is complete.

I understand that if I participate in a discussion group, my anonymity will be preserved through the use of my first name only.

I understand that I must respect the privacy and confidentiality of other study participants. The names of others involved in this study, and any personal information discussed during the group session are to be kept strictly confidential.

The research study with which you are participating may be reviewed for quality assurance to ensure that required laws and guidelines are followed. If chosen, representatives of the Human Research Ethics Program (HREP), may access study related data and/or consent materials as part of their review. All information accessed by the HREP will be upheld to the same standard of confidentiality that has been stated by the research team.

### Right to Refuse or Withdraw

I understand that my participation in this study is entirely voluntary and I am free to refuse to take part in the discussion group or to withdraw at any time prior to the discussion group without penalty. During the discussion group, I also understand that I can choose not to answer any given question without penalty. I understand if I withdraw from the study that my data will only be withdrawn if I explicitly request this to be done. I also understand that during and after the discussion groups, it will not be possible for me to withdraw my data from the study.

### Contact

**I understand that if I have any questions about the study, I can contact Dr. Monica Parry at 416-946-3561 (Principal Investigator).** I understand that if I have question about my rights as a research participant, I can contact the University of Toronto, Office of Research Ethics at [ethics.review@utoronto.ca](mailto:ethics.review@utoronto.ca) or 416-946-3273. I may keep this copy of the information and consent letter for my own reference.

### SUBJECT STATEMENT AND SIGNATURE SECTION

I have read and understand the consent form for this study. I have had the purposes, procedures and technical language of this study explained to me. I have been given enough time to consider the above information and to seek advice if I chose to do so. I have had the opportunity to ask questions which have been answered to my satisfaction. I am voluntarily signing this form.

\_\_\_\_\_  
(Signature of participant)

\_\_\_\_\_  
(Date)

### STATEMENT OF INVESTIGATOR AND SIGNATURE SECTION



1  
2  
3  
4  
5  
6  
7  
8  
9  
10  
11  
12  
13  
14  
15  
16  
17  
18  
19  
20  
21  
22  
23  
24  
25  
26  
27  
28  
29  
30  
31  
32  
33  
34  
35  
36  
37  
38  
39  
40  
41  
42  
43  
44  
45  
46  
47  
48  
49  
50  
51  
52  
53  
54  
55  
56  
57  
58  
59  
60

I, or one of my colleagues, have carefully explained to the subject the nature of the above research study. I certify that, to the best of my knowledge, the subject understands clearly the nature of the study and demands, benefits, and risks involved to subjects in this study.

\_\_\_\_\_  
(Signature of study personnel)

\_\_\_\_\_  
(Date)

For peer review only

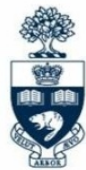

**BLOOMBERG**  
LAWRENCE S. BLOOMBERG  
FACULTY OF NURSING  
UNIVERSITY OF TORONTO

**Participant Information and Consent Form**  
**Study 2**

---

**Principal Investigator:**

**Dr. Monica Parry, Lawrence S. Bloomberg Faculty of Nursing, University of Toronto**

**Phone: (416) 946 – 3561**

**Email: women.heartpain@utoronto.ca**

---

**Co-Investigators:**

Dr. Hance Clarke - University Health Network  
Dr. Ann Kristin Bjørnnes – Oslo Metropolitan University  
Dr. Joseph Cafazzo – University Health Network  
Ms. Abida Dhukai – University of Toronto  
Dr. Paula Harvey – Women’s College Hospital  
Dr. Joel Katz – York University  
Dr. Chitra Lalloo – Hospital for Sick Children  
Dr. Marit Leegaard – Oslo Metropolitan University  
Dr. France Légaré - Université Laval  
Dr. Judith McFetridge-Durdle – Florida State University  
Dr. Michael McGillion – McMaster University  
Dr. Colleen Norris – University of Alberta  
Ms. Rose Patterson – Anishnawbe Health Toronto  
Dr. Louise Pilote – Research Institute of the McGill University Health Centre  
Ms. Leah Pink – Sinai Health System  
Dr. Jennifer Price – Women’s College Hospital  
Dr. Jennifer Stinson – Hospital for Sick Children  
Mr. J. Charles Victor – University of Toronto  
Dr. Judy Watt-Watson – Lawrence S. Bloomberg Faculty of Nursing  
Ms. Carol Auld – Patient Advisor  
Ms. Lynn Cooper – Patient Advisor  
Ms. Christine Faubert – Patient Advisor  
Ms. Deborah Park – Patient Advisor  
Ms. Marianne Park – Patient Advisor  
Ms. Beatrice Rickard – Patient Advisor  
Ms. Vincenza Spiteri DeBonis – Patient Advisor

**Title of Project:** Development and Usability Testing of HEARTPAIN: An Integrated Smartphone and Web-Based Intervention for Women with Cardiac Pain

**Purpose and Background**

More women die of coronary artery disease (CAD) than cancer, chronic lower respiratory disease, Alzheimer’s disease, and accidents combined. Coronary artery disease is also the leading cause of

1  
2 death of women across all ages, and recent data show an increase in CAD incidence and deaths in  
3 women younger than 55 years of age. Women with CAD have cardiac pain that differs from that of  
4 men. The overall goal of this program of research is to develop and assess a HEARTPAIN app and  
5 website that will help women self-manage cardiac pain. Feedback from women is a necessary step to  
6 designing HEARTPAIN.  
7

## 8 **Procedures**

9 If I agree to participate in this study, I understand that the following things will happen:

10  
11  
12 1. I will be asked to complete a baseline demographic form describing my age, education, employment,  
13 type and duration of cardiac pain etc. To protect my privacy and confidentiality, I will have a study ID  
14 number instead of my name on the form.  
15

16  
17 2. I will be asked to use the HEARTPAIN app and website as I work through cardiac pain scenarios  
18 and describe my experiences with HEARTPAIN. I will be observed during the session that will last for  
19 1-1.5 hours and take place in a quiet room at the Centre for Global eHealth Innovation. At the end of  
20 the session I will be asked four short questions and asked to complete a short questionnaire. The  
21 session will be video and audio-recorded and to protect my privacy and anonymity, my last name will  
22 not be used. All video/audio and transcribed files will be kept on the secure server at Bloomberg  
23 Nursing and only the PI (Parry) and Project Coordinator (Leyden) will have access to the password-  
24 protected server. Study data will be kept for seven years and then destroyed.  
25  
26

27 3. I understand that I can volunteer to participate in future studies as HEARTPAIN is developed/tested.  
28

## 29 **Potential Benefits**

30 Although there is no guarantee of direct benefits, I do understand that by participating in this study that  
31 I may have a better understanding of my cardiac pain.  
32  
33

34 I understand that I can get a plain language summary of the study results by checking the box below:

- 35  
36  I would like a copy of a plain language summary of the study results sent to me in an email link.  
37  
38

## 39 **Potential Risks**

40 I understand that there are no known risks to participating in this study. However, there may be  
41 unforeseeable risks. If I find that a cardiac pain scenario upsets me, I can discuss this with the  
42 researchers who are conducting this study. A mutually agreeable alternative scenario will be given to  
43 me.  
44

45  
46 If you experience medical distress during a scenario session, we ask that you let the facilitator know  
47 about your distress and medical attention will be sought.  
48

## 49 **Cost**

50 I understand that there is no charge for participating in this study. I may incur transportation, parking  
51 and/or out-of-pocket costs and these will be reimbursed as outlined in the financial compensation  
52 section.  
53

## 54 **Financial Compensation**

1  
2 I understand that my transportation and out-of-pocket expenses will be reimbursed, in accordance with  
3 University of Toronto's reimbursement to participant guidelines. Out-of-pocket expenses include, but  
4 are not limited to: ground transportation to/from session, accommodation if necessary, meals as  
5 required. [Participant guidelines for study reimbursements: [http://www.research.utoronto.ca/policies-  
6 and-procedures/compensation-and-reimbursement-of-research-participants/](http://www.research.utoronto.ca/policies-and-procedures/compensation-and-reimbursement-of-research-participants/)]. Original receipts and/or  
7 paid invoices will be required before payment is provided.  
8  
9

10 If the study results in the commercialization of this intervention, I understand that I will not be entitled  
11 to any financial benefits resulting from it.  
12

### 13 **Confidentiality**

14 I understand that information about specific individuals in this study will be kept strictly confidential  
15 and will not be available to anyone except the Principal Investigator (PI) and members of the  
16 investigative team. Only an identification number will appear on the demographic questionnaires, and  
17 therefore my responses will remain anonymous. One copy of my name and my study identification  
18 number will be kept in a locked drawer in the researcher's office. No one but Dr. Parry and the Project  
19 Coordinator will have access to the file. All information obtained in this study will be used for research  
20 purposes only. I will be able to access the results of the study from the PI when it is complete.  
21  
22

23  
24 The research study with which you are participating may be reviewed for quality assurance to ensure  
25 that required laws and guidelines are followed. If chosen, representatives of the Human Research  
26 Ethics Program (HREP), may access study related data and/or consent materials as part of their review.  
27 All information accessed by the HREP will be upheld to the same standard of confidentiality that has  
28 been stated by the research team.  
29

### 30 **Right to Refuse or Withdraw**

31 I understand that my participation in this study is entirely voluntary and I am free to refuse to take part  
32 in the usability testing or to withdraw at any time prior to the usability testing without penalty. During  
33 the usability testing, I also understand that I can choose not to answer any given question without  
34 penalty. I understand if I withdraw from the study that my data will only be withdrawn if I explicitly  
35 request this to be done. I also understand that during and after the usability testing, it will not be  
36 possible for me to withdraw my data from the study.  
37  
38

### 39 **Contact**

40 I understand that if I have any questions about the study, I can contact Dr. Monica Parry at 416-  
41 946-3561 (Principal Investigator). I understand that if I have question about my rights as a research  
42 participant, I can contact the University of Toronto, Office of Research Ethics at  
43 ethics.review@utoronto.ca or 416-946-3273. I may keep this copy of the information and consent letter  
44 for my own reference.  
45  
46

### 47 **SUBJECT STATEMENT AND SIGNATURE SECTION**

48 I have read and understand the consent form for this study. I have had the purposes, procedures and  
49 technical language of this study explained to me. I have been given enough time to consider the above  
50 information and to seek advice if I chose to do so. I have had the opportunity to ask questions which  
51 have been answered to my satisfaction. I am voluntarily signing this form.  
52  
53

54  
55  
56 \_\_\_\_\_  
(Signature of participant)

56 \_\_\_\_\_  
(Date)

**STATEMENT OF INVESTIGATOR AND SIGNATURE SECTION**

I, or one of my colleagues, have carefully explained to the subject the nature of the above research study. I certify that, to the best of my knowledge, the subject understands clearly the nature of the study and demands, benefits, and risks involved to subjects in this study.

\_\_\_\_\_  
(Signature of study personnel)

\_\_\_\_\_  
(Date)

For peer review only

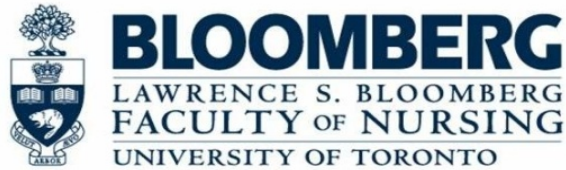

**Participant Information and Consent Form  
Study 3**

---

**Principal Investigator:**

**Dr. Monica Parry, Lawrence S. Bloomberg Faculty of Nursing, University of Toronto**

**Phone: (416) 946 – 3561**

**Email: [women.heartpain@utoronto.ca](mailto:women.heartpain@utoronto.ca)**

---

**Co-Investigators:**

Dr. Hance Clarke - University Health Network  
Dr. Ann Kristin Bjørnnes – Oslo Metropolitan University  
Dr. Joseph Cafazzo – University Health Network  
Ms. Abida Dhukai – University of Toronto  
Dr. Paula Harvey – Women’s College Hospital  
Dr. Joel Katz – York University  
Dr. Chitra Lalloo – Hospital for Sick Children  
Dr. Marit Leegaard – Oslo Metropolitan University  
Dr. France Légaré - Université Laval  
Dr. Judith McFetridge-Durdle – Florida State University  
Dr. Michael McGillion – McMaster University  
Dr. Colleen Norris – University of Alberta  
Ms. Rose Patterson – Anishnawbe Health Toronto  
Dr. Louise Pilote – Research Institute of the McGill University Health Centre  
Ms. Leah Pink – Sinai Health System  
Dr. Jennifer Price – Women’s College Hospital  
Dr. Jennifer Stinson – Hospital for Sick Children  
Mr. J. Charles Victor – University of Toronto  
Dr. Judy Watt-Watson – Lawrence S. Bloomberg Faculty of Nursing  
Ms. Carol Auld – Patient Advisor  
Ms. Lynn Cooper – Patient Advisor  
Ms. Christine Faubert – Patient Advisor  
Ms. Deborah Park – Patient Advisor  
Ms. Marianne Park – Patient Advisor  
Ms. Beatrice Rickard – Patient Advisor  
Ms. Vincenza Spiteri DeBonis – Patient Advisor

**Title of Project:** Development and Usability Testing of HEARTPAIN: An Integrated Smartphone and Web-Based Intervention for Women with Cardiac Pain

**Purpose and Background**

More women die of coronary artery disease (CAD) than cancer, chronic lower respiratory disease, Alzheimer’s disease, and accidents combined. Coronary artery disease is also the leading cause of

1  
2 death of women across all ages, and recent data show an increase in CAD incidence and deaths in  
3 women younger than 55 years of age. Women with CAD have cardiac pain that differs from that of  
4 men. The overall goal of this program of research is to develop and assess a HEARTPAIN app and  
5 website that will help women self-manage cardiac pain. Feedback from women is a necessary step to  
6 designing HEARTPAIN.  
7

## 8 **Procedures**

9 If I agree to participate in this study, I understand that the following things will happen:

10  
11  
12 1. I will be asked to attend one in-person session to learn about the study, provide consent, and  
13 complete a baseline demographic form describing my age, education, employment, type and duration  
14 of cardiac pain etc. To protect my privacy and confidentiality, I will have a study ID number instead of  
15 my name on the form.  
16

17  
18 2. I will be asked to complete two questionnaires that relate to my pain and health-related quality of  
19 life. In addition, I will be asked to fill out these same questionnaires at the end of the 3-month study. To  
20 protect my privacy and confidentiality, I will have a study ID number instead of my name on the  
21 questionnaires.  
22

23  
24 3. I understand that there will be two groups of participants in this study: HEARTPAIN group and a  
25 control group. I will be randomly assigned (e.g., like flipping a coin) to one of these two groups. I  
26 understand that if I am assigned to the control group, I will receive the usual care and supports given to  
27 women with cardiac pain, including usual clinic appointments and follow-up. If I am assigned to the  
28 HEARTPAIN group, I will also receive the usual care and supports given to women with cardiac pain,  
29 including usual clinic appointments and follow-up. In addition, I will log-in to the pain diary app daily  
30 for 3 months to complete pain diary entries and develop and track my goals. I can also use the  
31 HEARTPAIN website to learn more about cardiac pain.  
32

33  
34 4. To ensure privacy, all my personal information (e.g., name, address, phone number) will be stored  
35 separately from the health data (e.g., risk factors, pain descriptors) that I enter on the HEARTPAIN  
36 app/website. Information that is entered in the smartphone app/website or used by the reporting system  
37 will be separate from my personal information (e.g., name, address, phone number). No personal  
38 information (e.g., name, address, phone number) will be transmitted. For security issues, I will access  
39 the app/website using a study number and all health information that is transmitted will be sent securely  
40 through an encrypted HTTPS connection that prevents interception by a third party.  
41  
42

43  
44 5. I understand that my attendance in the HEARTPAIN study is not meant to replace my regular  
45 ongoing health care. I should not change any aspect of my regular treatment without first talking to my  
46 doctor.  
47

48 6. I understand that I can volunteer to participate in future studies as HEARTPAIN is developed/tested.  
49

## 50 **Potential Benefits**

51 I understand that by participating in this study I may have a better understanding of my cardiac pain.

52  
53 I understand that I can get a plain language summary of the study results by checking the box below:

54  
55  
56  I would like a copy of a plain language summary of the study results sent to me in an email link.  
57

### Potential Risks

I understand that there are no known risks to participating in this study. However, there may be unforeseeable risks. If I find that it is difficult for me to attend the in-person session, I can discuss this with the researchers who are conducting this study.

If you experience medical distress during the three-month app trial phase, please contact your local family doctor. If your medical distress is urgent, please call 911.

### Cost

I understand that there is no charge for participating in this study. I may incur transportation, parking and/or out-of-pocket costs and these will be reimbursed as outlined in the financial compensation section.

### Financial Compensation

I understand that if I need to travel to attend the in-person session my transportation costs will be reimbursed, in accordance with University of Toronto's reimbursement to participant guidelines. I also understand that a gift card will be provided at study completion (\$25). [Participant guidelines for study reimbursements: <http://www.research.utoronto.ca/policies-and-procedures/compensation-and-reimbursement-of-research-participants/>]. Original receipts and/or paid invoices will be required before payment is provided. If I am assigned to the HEARTPAIN group I will log-in to the pain diary app daily for 3 months to complete pain diary entries and develop and track my goals. This will be done using a Smartphone. If I need a Smartphone to participate in the study, one will be provided for the duration of the study. The study will also pay for data on the phone (\$85 each month). If the Smartphone gets lost/stolen/broken during the 3-month study, it will be replaced at no charge.

If the study results in the commercialization of this intervention, I understand that I will not be entitled to any financial benefits resulting from it.

### Confidentiality

I understand that information about specific individuals in this study will be kept strictly confidential and will not be available to anyone except the Principal Investigator (PI) and members of the investigative team. Only an identification number will appear on the demographic questionnaires, and therefore my responses will remain anonymous. One copy of my name and my study identification number will be kept in a locked drawer in the researcher's office. No one but Dr. Parry and the Project Coordinator will have access to the file. All information obtained in this study will be used for research purposes only. I will be able to access the results of the study from the PI when it is complete.

The research study with which you are participating may be reviewed for quality assurance to ensure that required laws and guidelines are followed. If chosen, representatives of the Human Research Ethics Program (HREP), may access study related data and/or consent materials as part of their review. All information accessed by the HREP will be upheld to the same standard of confidentiality that has been stated by the research team.

### Right to Refuse or Withdraw

I understand that my participation in this study is entirely voluntary and I am free to withdraw at any time without penalty. I also understand that I can choose not to answer any given question without penalty. I understand if I withdraw from the study that my data will only be withdrawn if I explicitly



1  
2 request this to be done. I also understand that after I receive my group assignment, it will not be  
3 possible for me to withdraw my data from the study.  
4

5 **Contact**

6 **I understand that if I have any questions about the study, I can contact Dr. Monica Parry at 416-**  
7 **946-3561 (Principal Investigator).** I understand that if I have question about my rights as a research  
8 participant, I can contact the University of Toronto, Office of Research Ethics at  
9 ethics.review@utoronto.ca or 416-946-3273. I may keep this copy of the information and consent letter  
10 for my own reference.  
11  
12  
13  
14  
15  
16  
17  
18  
19  
20  
21  
22  
23  
24  
25  
26  
27  
28  
29  
30  
31  
32  
33  
34  
35  
36  
37  
38  
39  
40  
41  
42  
43  
44  
45  
46  
47  
48  
49  
50  
51  
52  
53  
54  
55  
56  
57

For peer review only

**SUBJECT STATEMENT AND SIGNATURE SECTION**

I have read and understand the consent form for this study. I have had the purposes, procedures and technical language of this study explained to me. I have been given enough time to consider the above information and to seek advice if I chose to do so. I have had the opportunity to ask questions which have been answered to my satisfaction. I am voluntarily signing this form.

---

(Signature of participant)

---

(Date)

**STATEMENT OF INVESTIGATOR AND SIGNATURE SECTION**

I, or one of my colleagues, have carefully explained to the subject the nature of the above research study. I certify that, to the best of my knowledge, the subject understands clearly the nature of the study and demands, benefits, and risks involved to subjects in this study.

---

(Signature of study personnel)

---

(Date)

# SPIRIT and SPIRIT-PRO reporting checklist for protocol of a clinical trial.

|                                                         | Reporting Item                                                                                                                                                                                                                                                                                               | Page Number     |
|---------------------------------------------------------|--------------------------------------------------------------------------------------------------------------------------------------------------------------------------------------------------------------------------------------------------------------------------------------------------------------|-----------------|
| <b>Administrative information</b>                       |                                                                                                                                                                                                                                                                                                              |                 |
| Title                                                   | <a href="#">#1</a> Descriptive title identifying the study design, population, interventions, and, if applicable, trial acronym                                                                                                                                                                              | 1               |
| Trial registration                                      | <a href="#">#2a</a> Trial identifier and registry name. If not yet registered, name of intended registry                                                                                                                                                                                                     | 4               |
| Trial registration: data set                            | <a href="#">#2b</a> All items from the World Health Organization Trial Registration Data Set                                                                                                                                                                                                                 | 2, 4, 12-16, 18 |
| Protocol version                                        | <a href="#">#3</a> Date and version identifier                                                                                                                                                                                                                                                               | 2               |
| Funding                                                 | <a href="#">#4</a> Sources and types of financial, material, and other support                                                                                                                                                                                                                               | 18              |
| Roles and responsibilities: contributorship             | <a href="#">#5a</a> Names, affiliations, and roles of protocol contributors. <b>SPIRIT-PRO Elaboration/Extension:</b> Specify individual(s) responsible for the PRO content of the trial protocol                                                                                                            | 18              |
| Roles and responsibilities: sponsor contact information | <a href="#">#5b</a> Name and contact information for the trial sponsor                                                                                                                                                                                                                                       | 2, 18           |
| Roles and responsibilities: sponsor and funder          | <a href="#">#5c</a> Role of study sponsor and funders, if any, in study design; collection, management, analysis, and interpretation of data; writing of the report; and the decision to submit the report for publication, including whether they will have ultimate authority over any of these activities | 18              |

|    |                           |                     |                                                          |            |
|----|---------------------------|---------------------|----------------------------------------------------------|------------|
| 1  | Roles and                 | <a href="#">#5d</a> | Composition, roles, and responsibilities of the          | 15, 18     |
| 2  | responsibilities:         |                     | coordinating centre, steering committee, endpoint        |            |
| 3  | committees                |                     | adjudication committee, data management team, and        |            |
| 4  |                           |                     | other individuals or groups overseeing the trial, if     |            |
| 5  |                           |                     | applicable (see Item 21a for data monitoring             |            |
| 6  |                           |                     | committee)                                               |            |
| 7  |                           |                     |                                                          |            |
| 8  |                           |                     |                                                          |            |
| 9  |                           |                     |                                                          |            |
| 10 |                           |                     |                                                          |            |
| 11 | <b>Introduction</b>       |                     |                                                          |            |
| 12 |                           |                     |                                                          |            |
| 13 | Background and            | <a href="#">#6a</a> | Description of research question and justification for   | 6-8, 11-12 |
| 14 | rationale                 |                     | undertaking the trial, including summary of relevant     |            |
| 15 |                           |                     | studies (published and unpublished) examining            |            |
| 16 |                           |                     | benefits and harms for each intervention. <b>SPIRIT-</b> |            |
| 17 |                           |                     | <b>PRO Elaboration/Extension:</b> Describe the PRO-      |            |
| 18 |                           |                     | specific research question and rationale for PRO         |            |
| 19 |                           |                     | assessment and summarize PRO findings in relevant        |            |
| 20 |                           |                     | studies                                                  |            |
| 21 |                           |                     |                                                          |            |
| 22 |                           |                     |                                                          |            |
| 23 |                           |                     |                                                          |            |
| 24 |                           |                     |                                                          |            |
| 25 |                           |                     |                                                          |            |
| 26 |                           |                     |                                                          |            |
| 27 | Background and            | <a href="#">#6b</a> | Explanation for choice of comparators                    | 13         |
| 28 | rationale: choice of      |                     |                                                          |            |
| 29 | comparators               |                     |                                                          |            |
| 30 |                           |                     |                                                          |            |
| 31 |                           |                     |                                                          |            |
| 32 | Objectives                | <a href="#">#7</a>  | Specific objectives or hypotheses. <b>SPIRIT-PRO</b>     | 14         |
| 33 |                           |                     | <b>Elaboration/Extension:</b> State specific PRO         |            |
| 34 |                           |                     | objectives or hypotheses (including relevant PRO         |            |
| 35 |                           |                     | concepts/domains)                                        |            |
| 36 |                           |                     |                                                          |            |
| 37 |                           |                     |                                                          |            |
| 38 |                           |                     |                                                          |            |
| 39 |                           |                     |                                                          |            |
| 40 | Trial design              | <a href="#">#8</a>  | Description of trial design including type of trial (eg, | 12         |
| 41 |                           |                     | parallel group, crossover, factorial, single group),     |            |
| 42 |                           |                     | allocation ratio, and framework (eg, superiority,        |            |
| 43 |                           |                     | equivalence, non-inferiority, exploratory)               |            |
| 44 |                           |                     |                                                          |            |
| 45 |                           |                     |                                                          |            |
| 46 |                           |                     |                                                          |            |
| 47 | <b>Methods:</b>           |                     |                                                          |            |
| 48 | <b>Participants,</b>      |                     |                                                          |            |
| 49 | <b>interventions, and</b> |                     |                                                          |            |
| 50 | <b>outcomes</b>           |                     |                                                          |            |
| 51 |                           |                     |                                                          |            |
| 52 |                           |                     |                                                          |            |
| 53 |                           |                     |                                                          |            |
| 54 | Study setting             | <a href="#">#9</a>  | Description of study settings (eg, community clinic,     | 12         |
| 55 |                           |                     | academic hospital) and list of countries where data      |            |
| 56 |                           |                     | will be collected. Reference to where list of study      |            |
| 57 |                           |                     | sites can be obtained                                    |            |
| 58 |                           |                     |                                                          |            |
| 59 |                           |                     |                                                          |            |
| 60 |                           |                     |                                                          |            |

|    |                      |                      |                                                                                                                                                                                                                                                                                                                                                                                                   |        |
|----|----------------------|----------------------|---------------------------------------------------------------------------------------------------------------------------------------------------------------------------------------------------------------------------------------------------------------------------------------------------------------------------------------------------------------------------------------------------|--------|
| 1  | Eligibility criteria | <a href="#">#10</a>  | Inclusion and exclusion criteria for participants. If applicable, eligibility criteria for study centres and individuals who will perform the interventions (eg, surgeons, psychotherapists). <b>SPIRIT-PRO</b>                                                                                                                                                                                   | 9, 12  |
| 2  |                      |                      |                                                                                                                                                                                                                                                                                                                                                                                                   |        |
| 3  |                      |                      |                                                                                                                                                                                                                                                                                                                                                                                                   |        |
| 4  |                      |                      |                                                                                                                                                                                                                                                                                                                                                                                                   |        |
| 5  |                      |                      |                                                                                                                                                                                                                                                                                                                                                                                                   |        |
| 6  |                      |                      |                                                                                                                                                                                                                                                                                                                                                                                                   |        |
| 7  |                      |                      |                                                                                                                                                                                                                                                                                                                                                                                                   |        |
| 8  |                      |                      |                                                                                                                                                                                                                                                                                                                                                                                                   |        |
| 9  |                      |                      |                                                                                                                                                                                                                                                                                                                                                                                                   |        |
| 10 |                      |                      |                                                                                                                                                                                                                                                                                                                                                                                                   |        |
| 11 |                      |                      |                                                                                                                                                                                                                                                                                                                                                                                                   |        |
| 12 |                      |                      |                                                                                                                                                                                                                                                                                                                                                                                                   |        |
| 13 |                      |                      |                                                                                                                                                                                                                                                                                                                                                                                                   |        |
| 14 |                      |                      |                                                                                                                                                                                                                                                                                                                                                                                                   |        |
| 15 |                      |                      |                                                                                                                                                                                                                                                                                                                                                                                                   |        |
| 16 |                      |                      |                                                                                                                                                                                                                                                                                                                                                                                                   |        |
| 17 | Interventions:       | <a href="#">#11a</a> | Interventions for each group with sufficient detail to allow replication, including how and when they will be administered                                                                                                                                                                                                                                                                        | 13     |
| 18 | description          |                      |                                                                                                                                                                                                                                                                                                                                                                                                   |        |
| 19 |                      |                      |                                                                                                                                                                                                                                                                                                                                                                                                   |        |
| 20 |                      |                      |                                                                                                                                                                                                                                                                                                                                                                                                   |        |
| 21 |                      |                      |                                                                                                                                                                                                                                                                                                                                                                                                   |        |
| 22 |                      |                      |                                                                                                                                                                                                                                                                                                                                                                                                   |        |
| 23 | Interventions:       | <a href="#">#11b</a> | Criteria for discontinuing or modifying allocated interventions for a given trial participant (eg, drug dose change in response to harms, participant request, or improving / worsening disease)                                                                                                                                                                                                  | 13, 14 |
| 24 | modifications        |                      |                                                                                                                                                                                                                                                                                                                                                                                                   |        |
| 25 |                      |                      |                                                                                                                                                                                                                                                                                                                                                                                                   |        |
| 26 |                      |                      |                                                                                                                                                                                                                                                                                                                                                                                                   |        |
| 27 |                      |                      |                                                                                                                                                                                                                                                                                                                                                                                                   |        |
| 28 |                      |                      |                                                                                                                                                                                                                                                                                                                                                                                                   |        |
| 29 |                      |                      |                                                                                                                                                                                                                                                                                                                                                                                                   |        |
| 30 | Interventions:       | <a href="#">#11c</a> | Strategies to improve adherence to intervention protocols, and any procedures for monitoring adherence (eg, drug tablet return; laboratory tests)                                                                                                                                                                                                                                                 | 12-13  |
| 31 | adherence            |                      |                                                                                                                                                                                                                                                                                                                                                                                                   |        |
| 32 |                      |                      |                                                                                                                                                                                                                                                                                                                                                                                                   |        |
| 33 |                      |                      |                                                                                                                                                                                                                                                                                                                                                                                                   |        |
| 34 |                      |                      |                                                                                                                                                                                                                                                                                                                                                                                                   |        |
| 35 | Interventions:       | <a href="#">#11d</a> | Relevant concomitant care and interventions that are permitted or prohibited during the trial                                                                                                                                                                                                                                                                                                     | 13     |
| 36 | concomitant care     |                      |                                                                                                                                                                                                                                                                                                                                                                                                   |        |
| 37 |                      |                      |                                                                                                                                                                                                                                                                                                                                                                                                   |        |
| 38 |                      |                      |                                                                                                                                                                                                                                                                                                                                                                                                   |        |
| 39 | Outcomes             | <a href="#">#12</a>  | Primary, secondary, and other outcomes, including the specific measurement variable (eg, systolic blood pressure), analysis metric (eg, change from baseline, final value, time to event), method of aggregation (eg, median, proportion), and time point for each outcome. Explanation of the clinical relevance of chosen efficacy and harm outcomes is strongly recommended. <b>SPIRIT-PRO</b> | 14, 15 |
| 40 |                      |                      |                                                                                                                                                                                                                                                                                                                                                                                                   |        |
| 41 |                      |                      |                                                                                                                                                                                                                                                                                                                                                                                                   |        |
| 42 |                      |                      |                                                                                                                                                                                                                                                                                                                                                                                                   |        |
| 43 |                      |                      |                                                                                                                                                                                                                                                                                                                                                                                                   |        |
| 44 |                      |                      |                                                                                                                                                                                                                                                                                                                                                                                                   |        |
| 45 |                      |                      |                                                                                                                                                                                                                                                                                                                                                                                                   |        |
| 46 |                      |                      |                                                                                                                                                                                                                                                                                                                                                                                                   |        |
| 47 |                      |                      |                                                                                                                                                                                                                                                                                                                                                                                                   |        |
| 48 |                      |                      |                                                                                                                                                                                                                                                                                                                                                                                                   |        |
| 49 |                      |                      |                                                                                                                                                                                                                                                                                                                                                                                                   |        |
| 50 |                      |                      |                                                                                                                                                                                                                                                                                                                                                                                                   |        |
| 51 |                      |                      |                                                                                                                                                                                                                                                                                                                                                                                                   |        |
| 52 |                      |                      |                                                                                                                                                                                                                                                                                                                                                                                                   |        |
| 53 |                      |                      |                                                                                                                                                                                                                                                                                                                                                                                                   |        |
| 54 |                      |                      |                                                                                                                                                                                                                                                                                                                                                                                                   |        |
| 55 |                      |                      |                                                                                                                                                                                                                                                                                                                                                                                                   |        |
| 56 |                      |                      |                                                                                                                                                                                                                                                                                                                                                                                                   |        |
| 57 |                      |                      |                                                                                                                                                                                                                                                                                                                                                                                                   |        |
| 58 |                      |                      |                                                                                                                                                                                                                                                                                                                                                                                                   |        |
| 59 |                      |                      |                                                                                                                                                                                                                                                                                                                                                                                                   |        |
| 60 |                      |                      |                                                                                                                                                                                                                                                                                                                                                                                                   |        |

value, time to event) and the principal time point or period of interest

|                                                                                                                                                                                                                                                                                                                                                             |                      |                                                                                                                                                                                                                                                                                                                                                                                                                                                                                                                 |                                                                                                                                                                                                                                                                                                                                                                                                                                                                                                                                              |                       |
|-------------------------------------------------------------------------------------------------------------------------------------------------------------------------------------------------------------------------------------------------------------------------------------------------------------------------------------------------------------|----------------------|-----------------------------------------------------------------------------------------------------------------------------------------------------------------------------------------------------------------------------------------------------------------------------------------------------------------------------------------------------------------------------------------------------------------------------------------------------------------------------------------------------------------|----------------------------------------------------------------------------------------------------------------------------------------------------------------------------------------------------------------------------------------------------------------------------------------------------------------------------------------------------------------------------------------------------------------------------------------------------------------------------------------------------------------------------------------------|-----------------------|
| 1<br>2<br>3<br>4<br>5<br>6<br>7<br>8<br>9<br>10<br>11<br>12<br>13<br>14<br>15<br>16<br>17<br>18<br>19<br>20<br>21<br>22<br>23<br>24<br>25<br>26<br>27<br>28<br>29<br>30<br>31<br>32<br>33<br>34<br>35<br>36<br>37<br>38<br>39<br>40<br>41<br>42<br>43<br>44<br>45<br>46<br>47<br>48<br>49<br>50<br>51<br>52<br>53<br>54<br>55<br>56<br>57<br>58<br>59<br>60 | Participant timeline | <a href="#">#13</a>                                                                                                                                                                                                                                                                                                                                                                                                                                                                                             | Time schedule of enrolment, interventions (including any run-ins and washouts), assessments, and visits for participants. A schematic diagram is highly recommended. <b>SPIRIT-PRO Elaboration/Extension:</b> Include a schedule of PRO assessments, providing a rationale for the time points, and justifying if the initial assessment is not prerandomization. Specify time windows, whether PRO collection is prior to clinical assessments, and, if using multiple questionnaires, whether order of administration will be standardized | 12-14<br><br>Figure 1 |
| Sample size                                                                                                                                                                                                                                                                                                                                                 | <a href="#">#14</a>  | Estimated number of participants needed to achieve study objectives and how it was determined, including clinical and statistical assumptions supporting any sample size calculations. <b>SPIRIT-PRO Elaboration/Extension:</b> When a PRO is the primary endpoint, state the required sample size (and how it was determined) and recruitment target (accounting for expected loss to follow-up). If sample is not established based on the PRO endpoint, then discuss the power of the principal PRO analyses | 14-15                                                                                                                                                                                                                                                                                                                                                                                                                                                                                                                                        |                       |
| Recruitment                                                                                                                                                                                                                                                                                                                                                 | <a href="#">#15</a>  | Strategies for achieving adequate participant enrolment to reach target sample size                                                                                                                                                                                                                                                                                                                                                                                                                             | 12-13                                                                                                                                                                                                                                                                                                                                                                                                                                                                                                                                        |                       |
| <b>Methods:</b>                                                                                                                                                                                                                                                                                                                                             |                      |                                                                                                                                                                                                                                                                                                                                                                                                                                                                                                                 |                                                                                                                                                                                                                                                                                                                                                                                                                                                                                                                                              |                       |
| <b>Assignment of interventions (for controlled trials)</b>                                                                                                                                                                                                                                                                                                  |                      |                                                                                                                                                                                                                                                                                                                                                                                                                                                                                                                 |                                                                                                                                                                                                                                                                                                                                                                                                                                                                                                                                              |                       |
| Allocation:<br>sequence<br>generation                                                                                                                                                                                                                                                                                                                       | <a href="#">#16a</a> | Method of generating the allocation sequence (eg, computer-generated random numbers), and list of any factors for stratification. To reduce predictability of a random sequence, details of any planned restriction (eg, blocking) should be provided in a separate document that is unavailable to those who                                                                                                                                                                                                   | 12, 13                                                                                                                                                                                                                                                                                                                                                                                                                                                                                                                                       |                       |

|    |                        |                                                                            |       |
|----|------------------------|----------------------------------------------------------------------------|-------|
| 1  |                        | enrol participants or assign interventions                                 |       |
| 2  |                        |                                                                            |       |
| 3  | Allocation             | <a href="#">#16b</a> Mechanism of implementing the allocation sequence     | 13    |
| 4  | concealment            | (eg, central telephone; sequentially numbered,                             |       |
| 5  | mechanism              | opaque, sealed envelopes), describing any steps to                         |       |
| 6  |                        | conceal the sequence until interventions are                               |       |
| 7  |                        | assigned                                                                   |       |
| 8  |                        |                                                                            |       |
| 9  |                        |                                                                            |       |
| 10 |                        |                                                                            |       |
| 11 | Allocation:            | <a href="#">#16c</a> Who will generate the allocation sequence, who will   | 13    |
| 12 | implementation         | enrol participants, and who will assign participants to                    |       |
| 13 |                        | interventions                                                              |       |
| 14 |                        |                                                                            |       |
| 15 |                        |                                                                            |       |
| 16 |                        |                                                                            |       |
| 17 | Blinding (masking)     | <a href="#">#17a</a> Who will be blinded after assignment to interventions | 13-14 |
| 18 |                        | (eg, trial participants, care providers, outcome                           |       |
| 19 |                        | assessors, data analysts), and how                                         |       |
| 20 |                        |                                                                            |       |
| 21 |                        |                                                                            |       |
| 22 | Blinding (masking):    | <a href="#">#17b</a> If blinded, circumstances under which unblinding is   | N/A   |
| 23 | emergency              | permissible, and procedure for revealing a                                 |       |
| 24 | unblinding             | participant's allocated intervention during the trial                      |       |
| 25 |                        |                                                                            |       |
| 26 |                        |                                                                            |       |
| 27 |                        |                                                                            |       |
| 28 | <b>Methods: Data</b>   |                                                                            |       |
| 29 | <b>collection,</b>     |                                                                            |       |
| 30 | <b>management, and</b> |                                                                            |       |
| 31 | <b>analysis</b>        |                                                                            |       |
| 32 |                        |                                                                            |       |
| 33 |                        |                                                                            |       |
| 34 |                        |                                                                            |       |
| 35 | Data collection plan   | <a href="#">#18a</a> Plans for assessment and collection of outcome,       | 12-15 |
| 36 |                        | baseline, and other trial data, including any related                      |       |
| 37 |                        | processes to promote data quality (eg, duplicate                           |       |
| 38 |                        | measurements, training of assessors) and a                                 |       |
| 39 |                        | description of study instruments (eg, questionnaires,                      |       |
| 40 |                        | laboratory tests) along with their reliability and                         |       |
| 41 |                        | validity, if known. Reference to where data collection                     |       |
| 42 |                        | forms can be found, if not in the protocol. <b>SPIRIT-</b>                 |       |
| 43 |                        | <b>PRO Elaboration/Extension:</b> Justify the PRO                          |       |
| 44 |                        | instrument to be used and describe domains, number                         |       |
| 45 |                        | of items, recall period, and instrument scaling and                        |       |
| 46 |                        | scoring (e.g., range and direction of scores indicating                    |       |
| 47 |                        | a good or poor outcome). Evidence of PRO                                   |       |
| 48 |                        | instrument measurement properties, interpretation                          |       |
| 49 |                        | guidelines, and patient acceptability and burden                           |       |
| 50 |                        | should be provided or cited if available, ideally in the                   |       |
| 51 |                        |                                                                            |       |
| 52 |                        |                                                                            |       |
| 53 |                        |                                                                            |       |
| 54 |                        |                                                                            |       |
| 55 |                        |                                                                            |       |
| 56 |                        |                                                                            |       |
| 57 |                        |                                                                            |       |
| 58 |                        |                                                                            |       |
| 59 |                        |                                                                            |       |
| 60 |                        |                                                                            |       |

population of interest. State whether the measure will be used in accordance with any user manual and specify and justify deviations if planned. Include a data collection plan outlining the permitted mode(s) of administration (e.g., paper, telephone, electronic, other) and setting (e.g., clinic, home, other). Specify if more than one language version will be used and state whether translated versions have been developed using currently recommended methods. When the trial context requires someone other than a trial participant to answer on his or her behalf (a proxy-reported outcome), state and justify the use of a proxy respondent. Provide or cite evidence of the validity of proxy assessment if available

|                                                                                                                                                                                                                                                              |                                                   |                                                                                                                                                                                                                                                                                                                                                                                                                                                                    |              |
|--------------------------------------------------------------------------------------------------------------------------------------------------------------------------------------------------------------------------------------------------------------|---------------------------------------------------|--------------------------------------------------------------------------------------------------------------------------------------------------------------------------------------------------------------------------------------------------------------------------------------------------------------------------------------------------------------------------------------------------------------------------------------------------------------------|--------------|
| <p>1<br/>2<br/>3<br/>4<br/>5<br/>6<br/>7<br/>8<br/>9<br/>10<br/>11<br/>12<br/>13<br/>14<br/>15<br/>16<br/>17<br/>18<br/>19<br/>20<br/>21<br/>22<br/>23<br/>24<br/>25<br/>26<br/>27<br/>28<br/>29<br/>30<br/>31<br/>32<br/>33<br/>34<br/>35<br/>36<br/>37</p> | <p>Data collection plan: <a href="#">#18b</a></p> | <p>Plans to promote participant retention and complete follow-up, including list of any outcome data to be collected for participants who discontinue or deviate from intervention protocols. <b>SPIRIT-PRO Elaboration/Extension:</b> Specify PRO data collection and management strategies for minimizing avoidable missing data. Describe the process of PRO assessment for participants who discontinue or deviate from the assigned intervention protocol</p> | <p>12-14</p> |
| <p>38<br/>39<br/>40<br/>41<br/>42<br/>43<br/>44<br/>45<br/>46<br/>47</p>                                                                                                                                                                                     | <p>Data management <a href="#">#19</a></p>        | <p>Plans for data entry, coding, security, and storage, including any related processes to promote data quality (eg, double data entry; range checks for data values). Reference to where details of data management procedures can be found, if not in the protocol</p>                                                                                                                                                                                           | <p>15</p>    |
| <p>48<br/>49<br/>50<br/>51<br/>52<br/>53<br/>54<br/>55<br/>56<br/>57<br/>58<br/>59<br/>60</p>                                                                                                                                                                | <p>Statistics: outcomes <a href="#">#20a</a></p>  | <p>Statistical methods for analysing primary and secondary outcomes. Reference to where other details of the statistical analysis plan can be found, if not in the protocol. <b>SPIRIT-PRO Elaboration/Extension:</b> State PRO analysis methods, including any plans for addressing multiplicity/type I (<math>\alpha</math>) error</p>                                                                                                                           | <p>15-16</p> |



|    |                        |                      |                                                            |       |
|----|------------------------|----------------------|------------------------------------------------------------|-------|
| 1  | Statistics: additional | <a href="#">#20b</a> | Methods for any additional analyses (eg, subgroup          | N/A   |
| 2  | analyses               |                      | and adjusted analyses)                                     |       |
| 3  |                        |                      |                                                            |       |
| 4  |                        |                      |                                                            |       |
| 5  | Statistics: analysis   | <a href="#">#20c</a> | Definition of analysis population relating to protocol     | 15-16 |
| 6  | population and         |                      | non-adherence (eg, as randomised analysis), and            |       |
| 7  | missing data           |                      | any statistical methods to handle missing data (eg,        |       |
| 8  |                        |                      | multiple imputation). <b>SPIRIT-PRO</b>                    |       |
| 9  |                        |                      |                                                            |       |
| 10 |                        |                      |                                                            |       |
| 11 |                        |                      | <b>Elaboration/Extension:</b> State how missing data will  |       |
| 12 |                        |                      | be described and outline the methods for handling          |       |
| 13 |                        |                      | missing items or entire assessments (e.g., approach        |       |
| 14 |                        |                      | to imputation and sensitivity analyses)                    |       |
| 15 |                        |                      |                                                            |       |
| 16 |                        |                      |                                                            |       |
| 17 |                        |                      |                                                            |       |
| 18 | <b>Methods:</b>        |                      |                                                            |       |
| 19 | <b>Monitoring</b>      |                      |                                                            |       |
| 20 |                        |                      |                                                            |       |
| 21 |                        |                      |                                                            |       |
| 22 | Data monitoring:       | <a href="#">#21a</a> | Composition of data monitoring committee (DMC);            | 15    |
| 23 | formal committee       |                      | summary of its role and reporting structure;               |       |
| 24 |                        |                      | statement of whether it is independent from the            |       |
| 25 |                        |                      | sponsor and competing interests; and reference to          |       |
| 26 |                        |                      | where further details about its charter can be found, if   |       |
| 27 |                        |                      | not in the protocol. Alternatively, an explanation of      |       |
| 28 |                        |                      | why a DMC is not needed                                    |       |
| 29 |                        |                      |                                                            |       |
| 30 |                        |                      |                                                            |       |
| 31 |                        |                      |                                                            |       |
| 32 |                        |                      |                                                            |       |
| 33 |                        |                      |                                                            |       |
| 34 | Data monitoring:       | <a href="#">#21b</a> | Description of any interim analyses and stopping           | 15-16 |
| 35 | interim analysis       |                      | guidelines, including who will have access to these        |       |
| 36 |                        |                      | interim results and make the final decision to             |       |
| 37 |                        |                      | terminate the trial                                        |       |
| 38 |                        |                      |                                                            |       |
| 39 |                        |                      |                                                            |       |
| 40 |                        |                      |                                                            |       |
| 41 | Harms                  | <a href="#">#22</a>  | Plans for collecting, assessing, reporting, and            | 13-14 |
| 42 |                        |                      | managing solicited and spontaneously reported              |       |
| 43 |                        |                      | adverse events and other unintended effects of trial       |       |
| 44 |                        |                      | interventions or trial conduct. <b>SPIRIT-PRO</b>          |       |
| 45 |                        |                      |                                                            |       |
| 46 |                        |                      | <b>Elaboration/Extension:</b> State whether or not PRO     |       |
| 47 |                        |                      | data will be monitored during the study to inform the      |       |
| 48 |                        |                      | clinical care of individual trial participants and, if so, |       |
| 49 |                        |                      | how this will be managed in a standardized way.            |       |
| 50 |                        |                      | Describe how this process will be explained to             |       |
| 51 |                        |                      | participants; e.g., in the participant information sheet   |       |
| 52 |                        |                      | and consent form                                           |       |
| 53 |                        |                      |                                                            |       |
| 54 |                        |                      |                                                            |       |
| 55 |                        |                      |                                                            |       |
| 56 |                        |                      |                                                            |       |
| 57 |                        |                      |                                                            |       |
| 58 |                        |                      |                                                            |       |
| 59 |                        |                      |                                                            |       |
| 60 |                        |                      |                                                            |       |

|    |                                      |                      |                                                                                                                                                                                                                                    |                        |
|----|--------------------------------------|----------------------|------------------------------------------------------------------------------------------------------------------------------------------------------------------------------------------------------------------------------------|------------------------|
| 1  | Auditing                             | <a href="#">#23</a>  | Frequency and procedures for auditing trial conduct, if any, and whether the process will be independent from investigators and the sponsor                                                                                        | N/A                    |
| 2  |                                      |                      |                                                                                                                                                                                                                                    |                        |
| 3  |                                      |                      |                                                                                                                                                                                                                                    |                        |
| 4  |                                      |                      |                                                                                                                                                                                                                                    |                        |
| 5  |                                      |                      |                                                                                                                                                                                                                                    |                        |
| 6  | <b>Ethics and</b>                    |                      |                                                                                                                                                                                                                                    |                        |
| 7  | <b>dissemination</b>                 |                      |                                                                                                                                                                                                                                    |                        |
| 8  |                                      |                      |                                                                                                                                                                                                                                    |                        |
| 9  |                                      |                      |                                                                                                                                                                                                                                    |                        |
| 10 | Research ethics approval             | <a href="#">#24</a>  | Plans for seeking research ethics committee / institutional review board (REC / IRB) approval                                                                                                                                      | 16-17                  |
| 11 |                                      |                      |                                                                                                                                                                                                                                    |                        |
| 12 |                                      |                      |                                                                                                                                                                                                                                    |                        |
| 13 |                                      |                      |                                                                                                                                                                                                                                    |                        |
| 14 | Protocol amendments                  | <a href="#">#25</a>  | Plans for communicating important protocol modifications (eg, changes to eligibility criteria, outcomes, analyses) to relevant parties (eg, investigators, REC / IRBs, trial participants, trial registries, journals, regulators) | N/A                    |
| 15 |                                      |                      |                                                                                                                                                                                                                                    |                        |
| 16 |                                      |                      |                                                                                                                                                                                                                                    |                        |
| 17 |                                      |                      |                                                                                                                                                                                                                                    |                        |
| 18 |                                      |                      |                                                                                                                                                                                                                                    |                        |
| 19 |                                      |                      |                                                                                                                                                                                                                                    |                        |
| 20 |                                      |                      |                                                                                                                                                                                                                                    |                        |
| 21 |                                      |                      |                                                                                                                                                                                                                                    |                        |
| 22 |                                      |                      |                                                                                                                                                                                                                                    |                        |
| 23 | Consent or assent                    | <a href="#">#26a</a> | Who will obtain informed consent or assent from potential trial participants or authorised surrogates, and how (see Item 32)                                                                                                       | 12-13                  |
| 24 |                                      |                      |                                                                                                                                                                                                                                    |                        |
| 25 |                                      |                      |                                                                                                                                                                                                                                    |                        |
| 26 |                                      |                      |                                                                                                                                                                                                                                    |                        |
| 27 |                                      |                      |                                                                                                                                                                                                                                    |                        |
| 28 |                                      |                      |                                                                                                                                                                                                                                    |                        |
| 29 | Consent or assent: ancillary studies | <a href="#">#26b</a> | Additional consent provisions for collection and use of participant data and biological specimens in ancillary studies, if applicable                                                                                              | N/A                    |
| 30 |                                      |                      |                                                                                                                                                                                                                                    |                        |
| 31 |                                      |                      |                                                                                                                                                                                                                                    |                        |
| 32 |                                      |                      |                                                                                                                                                                                                                                    |                        |
| 33 |                                      |                      |                                                                                                                                                                                                                                    |                        |
| 34 | Confidentiality                      | <a href="#">#27</a>  | How personal information about potential and enrolled participants will be collected, shared, and maintained in order to protect confidentiality before, during, and after the trial                                               | 12-17                  |
| 35 |                                      |                      |                                                                                                                                                                                                                                    |                        |
| 36 |                                      |                      |                                                                                                                                                                                                                                    |                        |
| 37 |                                      |                      |                                                                                                                                                                                                                                    |                        |
| 38 |                                      |                      |                                                                                                                                                                                                                                    |                        |
| 39 |                                      |                      |                                                                                                                                                                                                                                    |                        |
| 40 |                                      |                      |                                                                                                                                                                                                                                    |                        |
| 41 | Declaration of interests             | <a href="#">#28</a>  | Financial and other competing interests for principal investigators for the overall trial and each study site                                                                                                                      | 18                     |
| 42 |                                      |                      |                                                                                                                                                                                                                                    |                        |
| 43 |                                      |                      |                                                                                                                                                                                                                                    |                        |
| 44 |                                      |                      |                                                                                                                                                                                                                                    |                        |
| 45 | Data access                          | <a href="#">#29</a>  | Statement of who will have access to the final trial dataset, and disclosure of contractual agreements that limit such access for investigators                                                                                    | 17                     |
| 46 |                                      |                      |                                                                                                                                                                                                                                    |                        |
| 47 |                                      |                      |                                                                                                                                                                                                                                    |                        |
| 48 |                                      |                      |                                                                                                                                                                                                                                    |                        |
| 49 |                                      |                      |                                                                                                                                                                                                                                    |                        |
| 50 |                                      |                      |                                                                                                                                                                                                                                    |                        |
| 51 | Ancillary and post trial care        | <a href="#">#30</a>  | Provisions, if any, for ancillary and post-trial care, and for compensation to those who suffer harm from trial participation                                                                                                      | Supplementary Material |
| 52 |                                      |                      |                                                                                                                                                                                                                                    |                        |
| 53 |                                      |                      |                                                                                                                                                                                                                                    |                        |
| 54 |                                      |                      |                                                                                                                                                                                                                                    |                        |
| 55 |                                      |                      |                                                                                                                                                                                                                                    |                        |
| 56 |                                      |                      |                                                                                                                                                                                                                                    |                        |
| 57 | Dissemination policy: trial results  | <a href="#">#31a</a> | Plans for investigators and sponsor to communicate trial results to participants, healthcare professionals,                                                                                                                        | 16-17                  |
| 58 |                                      |                      |                                                                                                                                                                                                                                    |                        |
| 59 |                                      |                      |                                                                                                                                                                                                                                    |                        |
| 60 |                                      |                      |                                                                                                                                                                                                                                    |                        |

the public, and other relevant groups (eg, via publication, reporting in results databases, or other data sharing arrangements), including any publication restrictions

|    |                      |                      |                                                        |
|----|----------------------|----------------------|--------------------------------------------------------|
| 1  |                      |                      |                                                        |
| 2  |                      |                      |                                                        |
| 3  |                      |                      |                                                        |
| 4  |                      |                      |                                                        |
| 5  |                      |                      |                                                        |
| 6  |                      |                      |                                                        |
| 7  | Dissemination        | <a href="#">#31b</a> | Authorship eligibility guidelines and any intended use |
| 8  | policy: authorship   |                      | of professional writers                                |
| 9  |                      |                      |                                                        |
| 10 |                      |                      |                                                        |
| 11 | Dissemination        | <a href="#">#31c</a> | Plans, if any, for granting public access to the full  |
| 12 | policy: reproducible |                      | protocol, participant-level dataset, and statistical   |
| 13 | research             |                      | code                                                   |
| 14 |                      |                      |                                                        |
| 15 |                      |                      |                                                        |
| 16 |                      |                      |                                                        |
| 17 | <b>Appendices</b>    |                      |                                                        |
| 18 |                      |                      |                                                        |
| 19 | Informed consent     | <a href="#">#32</a>  | Model consent form and other related documentation     |
| 20 | materials            |                      | given to participants and authorised surrogates        |
| 21 |                      |                      |                                                        |
| 22 |                      |                      |                                                        |
| 23 |                      |                      |                                                        |
| 24 |                      |                      |                                                        |
| 25 | Biological           | <a href="#">#33</a>  | Plans for collection, laboratory evaluation, and       |
| 26 | specimens            |                      | storage of biological specimens for genetic or         |
| 27 |                      |                      | molecular analysis in the current trial and for future |
| 28 |                      |                      | use in ancillary studies, if applicable                |
| 29 |                      |                      |                                                        |
| 30 |                      |                      |                                                        |
| 31 |                      |                      |                                                        |
| 32 |                      |                      |                                                        |

Chan A-W, Tetzlaff JM, Altman DG, Laupacis A, Gøtzsche PC, Krleža-Jerić K, Hróbjartsson A, Mann H, Dickersin K, Berlin J, Doré C, Parulekar W, Summerskill W, Groves T, Schulz K, Sox H, Rockhold FW, Rennie D, Moher D. SPIRIT 2013 Statement: Defining standard protocol items for clinical trials. *Ann Intern Med.* 2013;158(3):200-207

Calvert M, Kyle D, Mercieca-Bebber R, Slade A, Chan AW, King MT, and the SPIRIT-PRO Group. Guidelines for the Inclusion of Patient-Reported Outcomes in Clinical Trial Protocols, The SPIRIT-PRO Extension. *JAMA.* 2018; 319(5):483-494.
